# Supplementary material for: Asymmetric synthesis of propargylic alcohols via aldol reaction of aldehydes with ynals promoted by prolinol ether–transition metal–Brønsted acid cooperative catalysis
Source: Royal Society of Chemistry journal article supplement (doi:10.1039/c3sc51027a), 2013-01-01

# Asymmetric Synthesis of Propargylic Alcohols via Aldol Reaction of Aldehydes with Ynals Promoted by Prolinol Ether/Transition Metal/Brønsted Acid Cooperative Catalysis.

Enrique Gómez-Bengoña, Jesús M. García, Sandra Jiménez, Irati Lapuerta, Antonia Mielgo, José M. Odriozola, Itziar Otazo, Jesús Razkin, Iñaki Urruzuno, Silvia Vera, Mikel Oiarbide and Claudio Palomo.\*

Departamento de Química Orgánica I, Facultad de Química, Universidad del País Vasco  
UPV/EHU, Paseo Manuel Lardizabal 3, 20080 San Sebastián, Spain

## SUPPLEMENTARY INFORMATION

### Table of Contents

|                                                                                          |    |
|------------------------------------------------------------------------------------------|----|
| <b>A) General information</b> .....                                                      | 2  |
| <b>B) Preparation of aldehydes</b> .....                                                 | 2  |
| <b>C) Preparation of propargylic aldehydes</b> .....                                     | 10 |
| <b>D) General Procedure for the Cross-Aldol reactions</b> .....                          | 14 |
| <b>E) Reaction Scope</b> .....                                                           | 16 |
| <b>F) Reduction of propargylic aldol adducts</b> .....                                   | 33 |
| F.1) Hydrogenation of aldol adducts 3Ae, 3Bf, 3Ca and 4De .....                          | 33 |
| F.2) Partial reduction of 8Aa, 8Af, 8Ff .....                                            | 35 |
| <b>G) Elaboration of Propargylic Alcohols</b> .....                                      | 36 |
| G.1) Diiodination of adduct 3Af .....                                                    | 37 |
| G.2) Intramolecular hydroamination of aldol adduct 8Cf .....                             | 38 |
| G.3) Intramolecular hydroalkoxylation of adduct 3Af .....                                | 40 |
| G.4) Intramolecular cycloaddition reaction .....                                         | 41 |
| <b>H) Cross-aldol reaction of aliphatic aldehydes with aromatic aldehydes</b> .....      | 43 |
| <b>I) Results from other amine catalysts</b> .....                                       | 45 |
| <b>J) Determination of the relative and absolute configuration of adducts</b> .....      | 46 |
| <i>Relative configuration</i> .....                                                      | 46 |
| <i>Absolute configuration</i> .....                                                      | 46 |
| <b>K) Determination of absolute/relative configuration of 19 by X-Ray analysis</b> ..... | 50 |
| <b>L) <sup>1</sup>H and <sup>13</sup>C RMN of compounds</b> .....                        | 58 |
| <b>M) HPLC chromatograms of selected products</b> .....                                  | 94 |

## A) General information

Methylene chloride ( $\text{CH}_2\text{Cl}_2$ ) was distilled from  $\text{CaH}_2$ , THF was dried in a It Pure Solv column. Ethyl acetate and hexane were used as reagent grade. Purification of reaction products was carried out by flash column chromatography using silica gel 60 (0.040-0.063 mm, 230-400 mesh). Analytical thin layer chromatography (TLC) was performed on 0.25 mm silica gel 60-F plates. Visualization was accomplished with UV light and a solution obtained by admixing ammonium molybdate (21 g), cerium sulphate (1 g) and concentrated sulphuric acid (31 ml) in 470 mL of water, followed by heating. Melting points were measured with a Buchi SMP-20 melting point apparatus and are uncorrected.  $^1\text{H}$  and  $^{13}\text{C}$  NMR spectra were recorded on Bruker Advance-300 and are reported in ppm from internal tetramethylsilane (TMS). Analytical high performance liquid chromatography (HPLC) was performed on Waters-600E, equipped with 2996 and 2998 photodiode array UV detector, using Daicel Chiralpak AD-H, AS-H, OD-H, AY-H, IB, IC and IA columns. Optical rotations were recorded on a Jasco P-2000 polarimeter. MS spectra were recorded on an ESI-ion trap Mass spectrometer (Agilent 1100 series LC/MSD, SL model). Amine catalyst **4** was prepared according to previously reported procedure.<sup>1</sup>

## B) Preparation of aldehydes

Aldehydes **1A-C**, and **1F** were obtained from commercial sources and distilled prior use.

Aldehydes **1D**, **1E**, **1G** and **1H** were prepared according to reported procedures, as follow.

### *tert*-Butyl-5-oxopentanoate (**1D**)

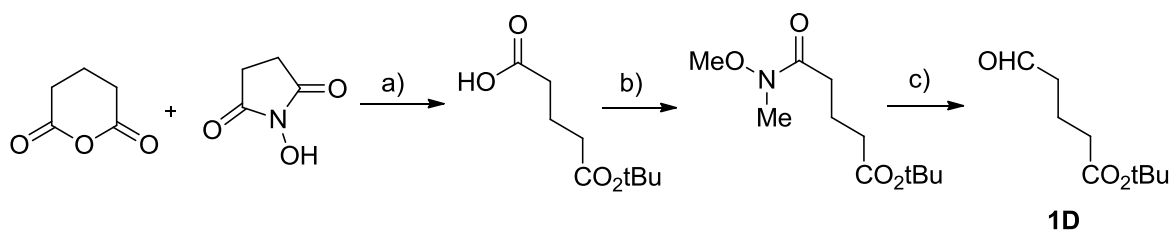

<sup>1</sup> Gómez-Bengoa, E.; Jimenez, J.; Lapuerta, .I.; Mielgo, A.; Oiarbide, M.; Otazo, I.; Velilla, I.; Vera, S.; Palomo, C. *Chem. Sci.* **2012**, *3*, 2949-2957.

### Procedure for Step a:<sup>2</sup>

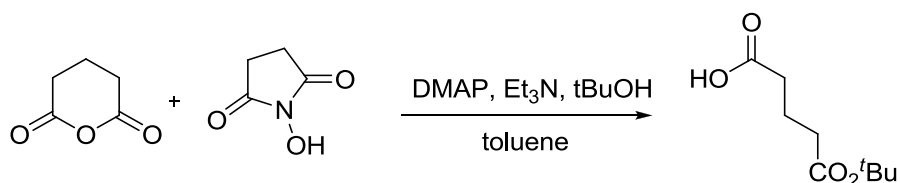

Glutaric anhydride (10.0 g, 87.6 mmol) was weighed into a dry flask and purged with N<sub>2</sub>. Dry toluene (50 mL) was added followed by *N*-hydroxysuccinimide (3.0 g, 26.1 mmol), 4-dimethylaminopyridine (1.07 g, 8.8 mmol), anhydrous *tert*-butanol (24.3 mL, 262.3 mmol), and triethylamine (3.6 mL, 25.8 mmol). The flask was fitted with a reflux condenser, heated to 115 °C, and allowed to stir for 16 h. The solution was cooled to room temperature, diluted with 300 mL EtOAc, and washed with 5% aqueous NaHSO<sub>4</sub> solution (3×, 100 mL) and brine (100 mL). The organic layer was dried over MgSO<sub>4</sub>, filtered and concentrated. The crude material was purified by column chromatography on silicagel (eluent hexanes/EtOAc 1:1) to yield 8.32 g (50% yield) of a colorless oil. The physical and spectroscopic data were in agreement with those described in the literature. <sup>1</sup>H NMR (300MHz, CDCl<sub>3</sub>): δ 10.83 (bs, 1H), 2.42 (t, *J* = 7.4 Hz, 2H), 2.31 (t, *J* = 2.31 Hz, 2H), 1.92 (m, 2H), 1.45 (s, 9H).

### Procedure for Step b:

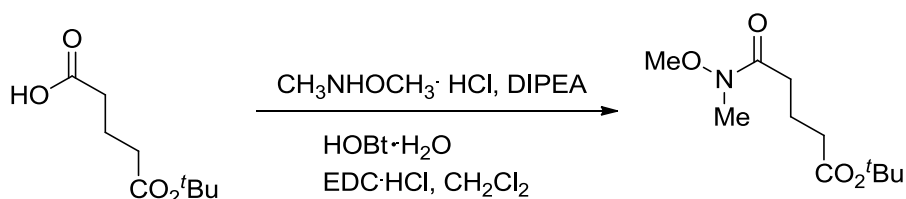

Thus obtained carboxylic acid (8.2 g, 44 mmol) was dissolved in CH<sub>2</sub>Cl<sub>2</sub> (200 mL) and to the solution were successively added hydrochloride *N,O*-dimethylhydroxylamine (4.72 g, 48.4 mmol), 1-hydroxybenzotriazole hydrate (6.53 g, 48.4 mmol), diisopropylethylamine (17 mL, 97 mmol), and EDC·HCl (9.28 g, 48.4 mmol). The mixture was stirred at room temperature for 2 h and then concentrated under vacuum to remove most of the CH<sub>2</sub>Cl<sub>2</sub>. The crude material was diluted with EtOAc (300 mL),

<sup>2</sup> Y. Chi, E. P. English, W. C. Pomerantz, W. S. Horne, L. A. Joyce, L. R. Alexander, W. S. Fleming, E. A. Hopkins, S. H. Gellman *J. Am. Chem. Soc.* **2007**, 129, 6050-6055

and washed successively with 5% aqueous NaHSO<sub>4</sub> solution (3× 100 mL), 5% aqueous NaHCO<sub>3</sub> solution (3× 100 mL), and brine (100 mL). The organic layer was dried over MgSO<sub>4</sub>, filtered and concentrated to afford 4.8 g (50% yield) of the product as a pale yellow oil which was used without further purification. <sup>1</sup>H NMR (300MHz, CDCl<sub>3</sub>) δ 3.68 (s, 3H), 3.18 (s, 3H), 2.48 (t, *J* = 7.4 Hz, 2H), 2.30 (t, *J* = 7.4 Hz, 2H), 1.92 (m, 2H), 1.45 (s, 9H).

#### Procedure for Step c:

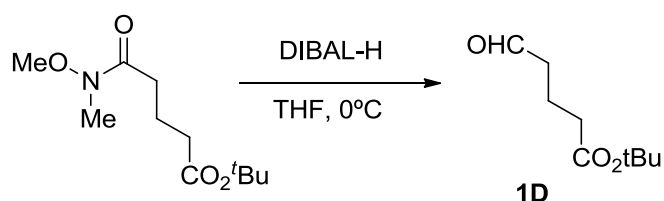

Weinreb amide (5.0 g, 21.6 mmol) was dissolved in dry THF (100 mL) and the solution was cooled to 0 °C under N<sub>2</sub>. Diisobutylaluminum hydride (43 mL of a 1.0 M solution in CH<sub>2</sub>Cl<sub>2</sub>, 43 mmol) was added dropwise. The reaction mixture was allowed to stir at 0 °C for 30 min and then quenched by slow addition of EtOAc (50 mL). The solution was poured into water (200 mL) and extracted with EtOAc (2 × 400 mL). The combined organic layers were washed successively with sat. aqueous NaHCO<sub>3</sub> solution (100 mL) and brine (100 mL), dried over MgSO<sub>4</sub>, filtered and concentrated. The crude material was purified by silicagel column chromatography (eluent hexanes/EtOAc 3:1) to yield 2.2 g (59% yield) of a colorless oil. <sup>1</sup>H NMR (300 MHz, CDCl<sub>3</sub>) δ 9.78 (t, *J* = 1.4 Hz, 1H), 2.51 (td, *J* = 7.3, 1.4 Hz, 2H), 2.28 (t, *J* = 7.3 Hz, 2H), 1.92 (m, 2H), 1.45 (s, 9H).

#### *tert*-Butyl 6-oxohexylcarbamate (**1E**)<sup>3</sup>

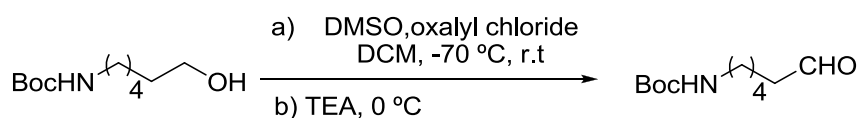

Prepared from *tert*-butyl 6-hydroxyhexylcarbamate (2.0 mL, 10 mmol) by Swern oxidation as follows: A solution of DMSO (2.27 mL, 32.0 mmol) in dichloromethane (16

<sup>3</sup> Adapted from: X. Xiao, S. Antony, G. Kohlhausen, Y. Pommier, M. Cushman, *Bioorg. Med. Chem.* **2004**, *12*, 5147-5160.

mL) was slowly added to a solution of oxalyl chloride (1.4 mL, 16.0 mmol) in dichloromethane (60 mL) previously cooled to  $-70\text{ }^{\circ}\text{C}$ . The resulting mixture was stirred at the same temperature for 5 minutes, after which a solution of the precursor alcohol (8.0 mmol) in dichloromethane (16 mL) was added dropwise and stirred for an additional hour at  $-70\text{ }^{\circ}\text{C}$ . Triethylamine (6.68 mL, 48 mmol) was subsequently slowly added, the resulting mixture allowed to reach  $0\text{ }^{\circ}\text{C}$ , and stirred at that temperature for one hour. The resulting mixture was poured into water (40 mL) and diluted with  $\text{Et}_2\text{O}$  (400 mL). The organic layer was separated and washed with brine (2 x 75 mL), dried over  $\text{MgSO}_4$  and concentrated under reduced pressure. The crude product was purified by silicagel flash column chromatography (eluent hexane:ethyl acetate). The title compound was obtained as a colorless oil: 1.85 g, (85% yield). The physical and spectroscopic data were in agreement with those described in the literature.

$^1\text{H}$ -RMN (300 MHz,  $\text{CDCl}_3$ )  $\delta$ : 9.76 (t,  $J = 1.7\text{ Hz}$ , 1H), 3.11 (d,  $J = 6.5\text{ Hz}$ , 2H), 2.43, (dt,  $J = 1.7, 7.2, 7.3\text{ Hz}$ , 2H), 1.70-1.23 (m, 6H), 1.44 (s, 9H).

### 6,6-Dimethoxyhexanal (**1G**)<sup>4,5</sup>

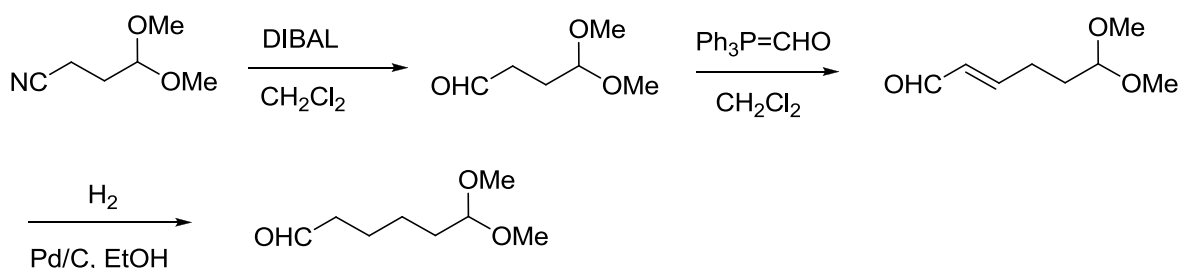

<sup>4</sup> Adapted from: Takeishi, K.; Sugishima, K.; Sasaki, K.; Tanaka, K. *Chem. Eur. J.* **2004**, *10*, 5681-5688.

<sup>5</sup> Adapted from: Lopez, R.; Zalacain, M.; Palomo, C. *Chem. Eur. J.* **2011**, *17*, 2450-2457.

### Procedure for Step a:

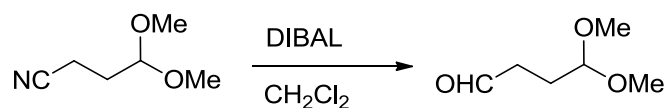

DIBAL (0.95 M in *n*-hexane, 24.4 mL, 23.2 mmol) was added a solution of 3-cyanopropionaldehyde dimethyl acetal (3.02 mL, 23.5 mmol) in CH<sub>2</sub>Cl<sub>2</sub> (120 mL) at -78 °C and the resulting mixture was stirred for 1h. The resulting mixture was warmed slowly to RT, and treated with excess saturated aqueous NH<sub>4</sub>Cl. The reaction mixture was then diluted with water and extracted with CH<sub>2</sub>Cl<sub>2</sub>. The organic layer was washed with water, dried over MgSO<sub>4</sub>, and concentrated, which afforded crude 4,4-dimethoxybutyaldehyde (2.6 g, 19.6 mmol, 84 %) as a pale yellow oil.

### Procedure for Step b:

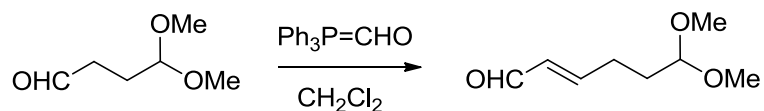

The aldehyde was added dropwise in CH<sub>2</sub>Cl<sub>2</sub> (10 mL) at 0 °C to a solution of formylmethylenetriphenylphosphorane (10 g, 34 mmol, 2 equiv) in CH<sub>2</sub>Cl<sub>2</sub> (20 mL). The resulting mixture was stirred at the same temperatura for 2 h, warmed up to 50 °C, and stirred for 24 h. Upon reaction completion, the solvent was removed under reduced pressure and the crude product was purified by flash column chromatography (eluent mixtures EtOAc / Hexane 80:20) to afford the corresponding pure adehyde (50 % yield) as a pale yellow oil.

### Procedure for Step c:

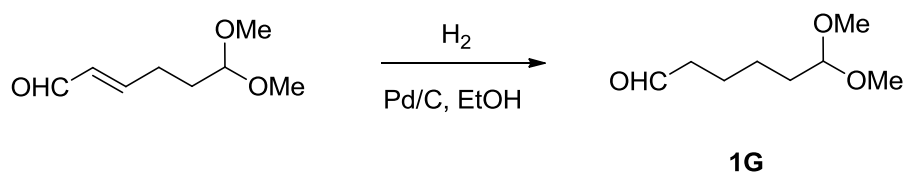

To a 25 mL flash charged with a solution of enal (948 mg, 6 mmol) in ethanol (12 mL) was added Pd/C (10% wt, 180 mg). The flask was filled with hydrogen gas and stirred for 16 h at room temperature under hydrogen balloon. The mixture was filtered over celite pad and the filtrate was concentrated. Purification on a silica gel column (hexane/AcOEt, 80:20) provided 768 mg of the aldehyde **1G** (4.8 mmol, 80% yield) as a pale yellow oil.  $^1\text{H}$  NMR (300 MHz,  $\text{CDCl}_3$ )  $\delta$  9.80 (t,  $J = 1.7$  Hz, 1H), 4.39 (dd,  $J = 7.1$  Hz, 4.1, 1H), 3.35 (s, 6H), 2.44 (dd,  $J = 8.2, 6.5$  Hz, 3H), 1.97 (td,  $J = 7.3, 5.4$  Hz, 4H), 1.43 (tdd,  $J = 10.8, 7.2, 4.0$  Hz, 2H).

### Synthesis of (E)-6-(3,5-dimethylphenoxy)-4-methylhex-4-enal (**1H**)

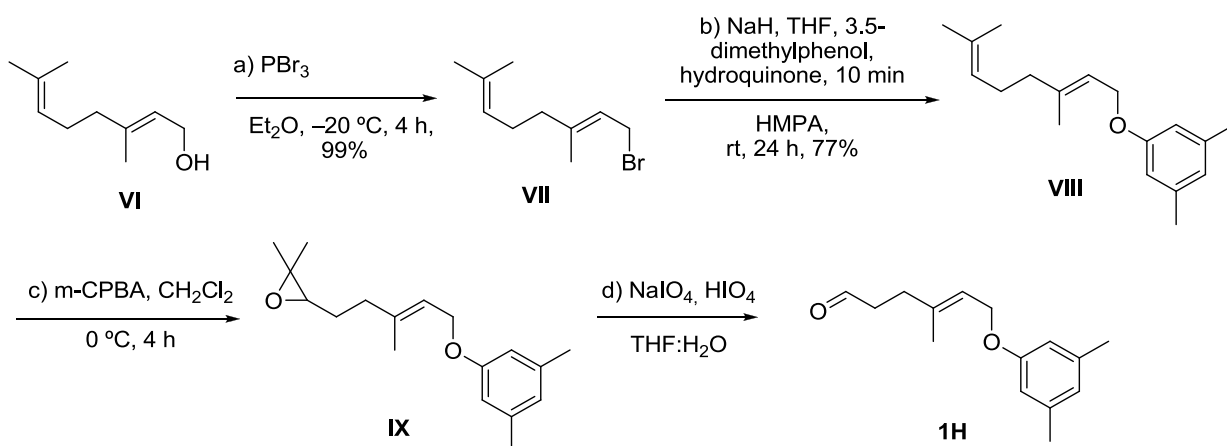

### Procedure for step a (VII)<sup>6</sup>

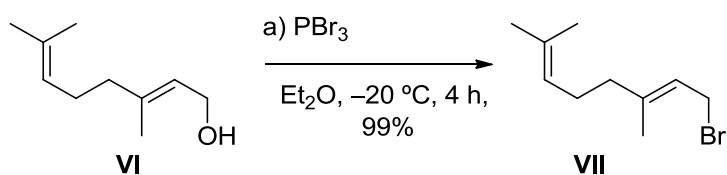

To a solution of *trans*-geraniol (17.5 mL, 100 mmol) in ether (75 mL) at  $-20\text{ }^\circ\text{C}$  was added a solution of phosphorus tribromide (4.7 mL, 50 mmol) in ether (45 mL) within 10 min, and the reaction mixture was stirred for 4 h. The reaction was quenched with water, extracted with petroleum ether, washed in turn with water, with saturated aqueous  $\text{NaHCO}_3$ , and brine. The organic layer was dried ( $\text{MgSO}_4$ ) and evaporated at  $30\text{ }^\circ\text{C}$  to provide (*E*)-geranyl bromide (**II**) (21.7 g, 99%) of as a labile yellow liquid which was used without further purification.  $^1\text{H}$  NMR (300 MHz,  $\text{CDCl}_3$ )  $\delta$  5.53 (tq,  $J = 6.5, 1.5$  Hz, 1H), 5.08 (m, 1H), 4.02 (d,  $J = 8.4$  Hz, 2H), 2.16 – 2.00 (m, 4H), 1.73 (s, 3H), 1.69 (s, 3H), 1.60 (s, 3H).

### Procedure for step b (VIII)<sup>7</sup>

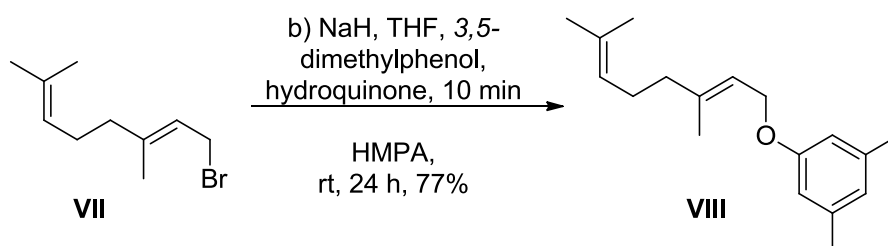

To a stirred suspension of sodium hydride (60% in oil, 1050 mg, 25.25 mmol) in THF (75 mL) at room temperature under argon atmosphere was added 3,5-dimethylphenol (25 mmol) portion wise followed by a catalytic amount of hydroquinone (10% mmol). The mixture was stirred for 0.5 h at room temperature. Hexamethylphosphoramide (HMPA, 17.5 mL) and geranyl bromide (**II**) (25 mmol) were successively added. The whole mixture was stirred for 1 day. After decomposition of excess sodium hydride with methanol (2 mL), the mixture was poured into ice-water and extracted with ether. The combined organic layers were dried, concentrated and purified by column chromatography on silica gel (hexane-ethyl acetate 95:5 as eluent) to give geranyl aryl ether (**III**) (70% yield) as a yellow oil.  $^1\text{H}$  RMN (300 MHz,  $\text{CDCl}_3$ )  $\delta$  6.56-6.80 (m, 3H),

<sup>6</sup> Paz, J.L.; Rodroquez, J.A.R.; *J. Braz. Chem. Soc.* **2003**, *14*, 975-981.

<sup>7</sup> Ishihara, K.; Nakamura, S.; Yamamoto, H. *J. Am. Chem. Soc.* **1999**, *121*, 4906-4907.



5,50 (tq,  $J = 6.6, 1.5$  Hz, 1H), 5,06-5,14 (m, 1H), 4,51 (d,  $J = 6,6$ , 2H), 2,29 (s, 6H), 2,10 (m, 4H) 1,74 (s, 3H), 1,69 (s, 3H), 1,62 (s, 3H).

#### Procedure for step c (IX)<sup>8</sup>

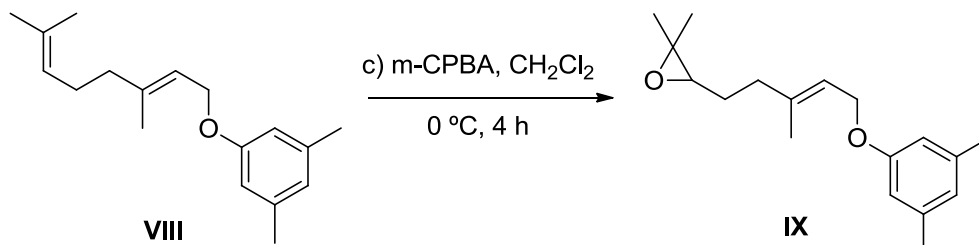

To a solution of geranyl phenyl ether (**VIII**) (17.6 mmol) in CH<sub>2</sub>Cl<sub>2</sub> (45 mL) was added dropwise *m*-chloroperbenzoic acid (4.9 g, 70%, 19.4 mmol) in CH<sub>2</sub>Cl<sub>2</sub> (50 mL) at 0 °C. After the addition was complete, the mixture was stirred at 0 °C for another 4 h. The reaction was quenched by the addition of 50 mL of saturated NaHCO<sub>3</sub>, the organic phase was separated, and the aqueous phase was extracted with CH<sub>2</sub>Cl<sub>2</sub> (3 x 50 mL). The combined organic extracts were washed with brine, dried over Na<sub>2</sub>SO<sub>4</sub>, and concentrated in vacuum. The crude product was purified by silica gel chromatography (hexane-ethyl acetate 90:10 as eluent) to give (**IV**) (4.11 g, 87%) as a yellow oil. <sup>1</sup>H RMN (300 MHz, CDCl<sub>3</sub>) δ 6.54-6.60 (m, 3H), 5.50 (tq,  $J = 6.5, 1.3$  Hz, 1H), 4.51 (d,  $J = 6.4$  Hz, 2H), 2.71 (t,  $J = 6.2$ , 1H), 2.28 (s, 6H), 2.21 (m, 2H), 1.76 (s, 3H), 1.68 (m, 2H) 1.31 (s, 3H), 1.27 (s, 3H).

#### Procedure for step d (1H)<sup>9</sup>

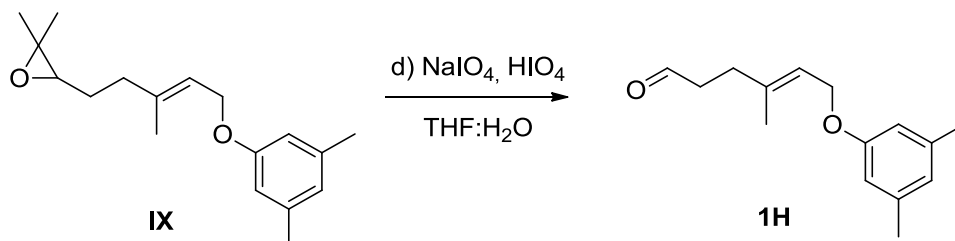

A solution of epoxide (**IX**) (1.0 eq) in THF:H<sub>2</sub>O (10:1, 30 mL) was treated sequentially at 0 °C with NaIO<sub>4</sub> (0.6 equiv) and HIO<sub>4</sub>·2H<sub>2</sub>O (1.1 equiv). The resultant biphasic mixture was stirred at 0 °C for 10 min and then warmed to room temperature. After 1 h, the reaction mixture was quenched with saturated aqueous NaHCO<sub>3</sub> (25 mL), poured into

<sup>8</sup> Surendra, K.; E. J. Corey, *J. Am. Chem. Soc.* **2008**, *130* (27), 8865–8869

<sup>9</sup> Surendra, K.; Qiu, W.; E. J. Corey, *J. Am. Chem. Soc.*, **2011**, *133* (25), 9724–9726

H<sub>2</sub>O (25 mL), and the aqueous layer was extracted with EtOAc (3 x 50 ml). The combined organic layers were washed with brine, dried over Na<sub>2</sub>SO<sub>4</sub>, and concentrated *in vacuo*. The crude product was purified by silica gel chromatography (hexane-ethyl acetate 95:5 as eluent) to give the desired aldehyde **1H** as orange oil. Yield: 81% (0.8 g). <sup>1</sup>H RMN (300 MHz, CDCl<sub>3</sub>) δ 7.79 (t, *J* = 1.6 Hz, 1H), 6.53-6.60 (m, 3H), 5.51 (tq, *J*: = 6.4, 1.3 Hz, 1H), 4.50 (d, *J* = 5.9 Hz, 2H), 2.59 (m, 2H), 2.41 (m, 2H), 2.29 (s, 6H), 1.75 (s, 3H).

### Hexane-1,6-dial (**9**)<sup>10</sup>

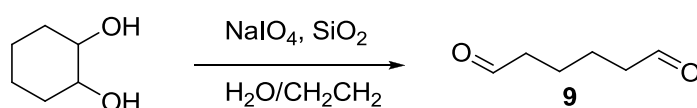

To a vigorously stirred suspension of chromatographic grade silica gel (105 g) in CH<sub>2</sub>Cl<sub>2</sub> (500mL) was added an aqueous solution of NaIO<sub>4</sub> (0.65 M, 68.2 mmol), whence a flaky suspension was formed. 1,2-Cyclohexanediol (6.08 g, 52.3 mmol) in CH<sub>2</sub>Cl<sub>2</sub> (200 mL) was then added, and the reaction was stirred for 24 h. The mixture was filtered on a sintered glass, and the silica gel was thoroughly washed with CH<sub>2</sub>Cl<sub>2</sub>. Evaporation of the solvent afforded the title compound as a colorless oil in quantitative yield (5.91 g). No further purification was necessary.

### C) Preparation of propargylic aldehydes<sup>11</sup>

All propargylic aldehydes were synthesized as described below, except octynal (**2a**) and phenyl propynal (**2f**) that are commercially available.

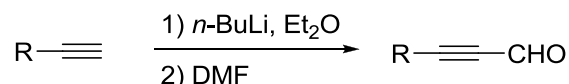

To a round bottomed flask under nitrogen atmosphere filled of dry Et<sub>2</sub>O (50 mL) and cooled to -60 °C, were added dropwise *n*-BuLi (50 mmol, 20 mL, 2.5 M in hexane) and then the corresponding alkyne (50 mmol). The reaction mixture was stirred at this

<sup>10</sup> Lopez, S.; Fernandez-Trillo, F.; Midón, P.; Castedo, L.; Saá, C. *J. Org. Chem.* **2005**, *70*, 6346-6352.

<sup>11</sup> L. Brandsma, *Preparative Acetylenic Chemistry (Studies in Organic Chemistry 34)* Ed. Elsevier, Amsterdam, **1988**, 97-112

temperature for 30 min after which DMF (4.3 mL, 62.5 mmol) was added slowly. The resulting mixture was removed from the bath, warmed slowly to room temperature and stirred at this temperature for 20 minutes. Finally the reaction mixture was poured slowly into a cold solution of water (25 mL) and HCl conc.(4 mL) and a solution of saturated NaHCO<sub>3</sub> was added dropwise until pH 6-7. The organic layer was separated and the aqueous phase extracted with Et<sub>2</sub>O (3x 20 mL). The combined organic layers were dried over MgSO<sub>4</sub>, filtered and concentrated under reduce pressure. The crude product was purified by silica gel chromatography unless otherwise stated.

### Hex-2-ynal (2b)

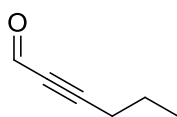

Prepared according to general procedure, starting from 1 pentyne (1.9 mL, 20 mmol). Yellow liquid. Yield: 33% (0.6g).

<sup>1</sup>H NMR (300 MHz, CDCl<sub>3</sub>) δ 9.18 (t, *J* = 0.9 Hz, 1H), 2.39 (td, *J* = 7.0, 0.8 Hz, 2H), 1.64 (dt, *J* = 14.5, 7.3 Hz, 2H), 1.02 (t, *J* = 7.4 Hz, 3H).

### 5-Methylhex-2-ynal (2c)

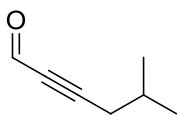

Prepared according to general procedure, starting from 4-methylpent-1-yne (1.4 mL, 10 mmol). Yellow liquid. Yield: 63% (0.7 g).

<sup>1</sup>H NMR (300 MHz, CDCl<sub>3</sub>) δ 9.19 (t, *J* = 0.8 Hz, 1H), 2.31 (dd, *J* = 6.5, 0.8 Hz, 2H), 1.93 (dt, *J* = 13.3, 6.6 Hz, 1H), 1.02 (d, *J* = 6.7 Hz, 7H).

### 5-Phenylpent-2-ynal (2d)

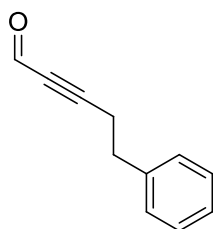

Prepared according to general procedure, starting from 4-phenyl-1-butyne (1.4 mL, 10 mmol). Yellow liquid. Yield: 89% (1.41 g).

<sup>1</sup>H NMR (400 MHz, CDCl<sub>3</sub>) δ 9.18 (t, *J* = 0.8 Hz, 1H), 7.37-7.24 (m, 5H), 2.94 (t, *J* = 7.4 Hz, 2H), 2.74 (dt, *J* = 7.4 Hz, *J* = 0.7 Hz, 2H).

### 3-Cyclohexylpropionaldehyde (2e)<sup>12</sup>

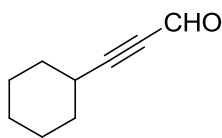

Prepared according to general procedure, starting from ethynylcyclohexane (1.3 mL, 10 mmol). Yellow liquid. Yield: 90% (1.22 g). Spectroscopic data were in agreement with those previously reported.

<sup>1</sup>H NMR (300 MHz, CDCl<sub>3</sub>) δ 9.23 (d, *J* = 0.8 Hz, 1H), 2.70 – 2.55 (m, 1H), 1.96 – 1.83 (m, 2H), 1.83 – 1.67 (m, 2H), 1.56 (m, 3H), 1.48 – 1.23 (m, 3H).

### 3-(*p*-Methoxyphenyl)propionaldehyde (2g)<sup>13</sup>

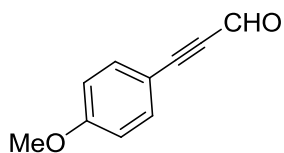

Prepared according to general procedure, starting from 1-ethynyl-4-methoxybenzene (1.30 g, 10 mmol). The crude material was crystallized from hexane. Yield: 52% (0.83 g). Colourless crystals. Spectroscopic data were in agreement with those previously reported.

<sup>1</sup>H NMR (300 MHz, CDCl<sub>3</sub>) δ 9.39 (s, 1H), 7.59 – 7.52 (m, 2H), 6.95 – 6.88 (m, 2H), 3.85 (s, 3H).

### *m*-Chlorofenilpropinal (2h)<sup>14</sup>

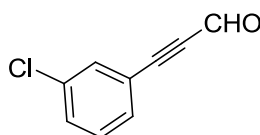

Prepared according to general procedure, starting from 1-chloro-2-ethynylbenzene (1.23 g, 10 mmol). The crude material was purified by flash column chromatography on silica gel (eluting with hexane/ ethyl acetate 98/2) to give the title compound as a yellow oil. Yield: 56% (0.92 g).

<sup>1</sup>H NMR (400 MHz, CDCl<sub>3</sub>) δ: 9.48 (s, 1H), 7.65 (t, *J* = 1.6 Hz, 1H), 7.46 (m, 1H), 7.42 (m, 1H), 7.30 (dd, *J* = 11.7, 4.0 Hz, 1H).

<sup>12</sup> Y. -L. Shen, W. -T. Wu, Q. Liu, G. -L. Wu, L. -M. Wu. *J. Chem. Res.* **2006**, 545-546.

<sup>13</sup> S. Ma, J. Liu, S. Li, B. Chen, J. Cheng, J. Kuang, Y. Liu, B. Wan, Y. Wang, J. Ye, Q. Yu, W. Yuan, S. Yu, *Adv. Synth. Cat.* **2011**, 353, 1005-1017.

<sup>14</sup> C.R. Solorio-Alvarado, A. M. Echavarren, *J. Am. Chem. Soc.* **2010**, 132, 11881-11883.

#### 4,4-Diethoxybut-2-ynal (2i)

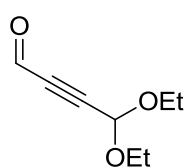

Prepared according to general procedure, starting from propargyl aldehyde diethyl acetal (1.4 mL, 10 mmol) but the reaction mixture was treated pouring it slowly into a cold solution of 10% citric acid (15 mL) and then a solution of saturated NaHCO<sub>3</sub> was added dropwise until pH 6-7. Yield: 50% (0.78 g).

<sup>1</sup>H NMR (400 MHz, CDCl<sub>3</sub>) δ 9.30 (d, *J* = 0.5 Hz, 1H), 5.44 (s, 1H), 3.78 (dq, *J* = 7.1 Hz, *J* = 9.4 Hz, 2H), 3.66 (dq, *J* = 7.1 Hz, *J* = 9.4 Hz, 2H), 1.28 (t, *J* = 7.1 Hz, 6H).

#### 6-Chlorohex-2-ynal (2j)

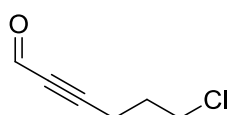

Prepared according to general procedure, starting from 5 chloro-1-pentyne (0.5mL, 5 mmol). Brown liquid. Yield: 56% (0.3g).

<sup>1</sup>H NMR (300 MHz, CDCl<sub>3</sub>) δ 9.18 (s, 1H), 3.66 (t, *J* = 6.2, 2H), 2.64 (t, *J* = 6.9, 2H), 2.18 – 1.96 (m, 2H).

#### 3-(Thiophen-3-yl)propionaldehyde (2k)

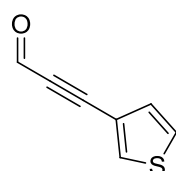

Prepared according to general procedure, starting from 3-ethynylthiophene (0.98mL, 10 mmol). Black oil. Yield: 45% (612.8 mg).

<sup>1</sup>H NMR (300 MHz, CDCl<sub>3</sub>) δ 9.40 (s, 1H), 7.82 (dd, *J* = 2.9, 1.1, 1H), 7.36 (dd, *J* = 5.0, 3.0, 1H), 7.24 (d, *J* = 1.1, 1H).

#### 6-((4-methoxybenzyl)oxy)hex-2-ynal (2l)

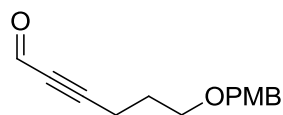

Prepared according to general procedure, starting from 1-methoxy-4-((pent-4-yn-1-yloxy)methyl)benzene<sup>15</sup> (2g, 10 mmol). Brown liquid. Yield: 56% (1.2g).

<sup>1</sup>H NMR (300 MHz, CDCl<sub>3</sub>) δ 9.19 (s, 0H), 7.29 (d, *J* = 8.7, 2H), 6.92 (d, *J* = 8.7, 2H), 4.48 (s, 2H), 3.84 (s, 3H), 3.57 (t, *J* = 5.9, 2H), 2.58 (t, *J* = 7.1, 2H), 1.96 – 1.86 (m, 2H).

<sup>15</sup> K. Frimpong, J. Wzorek, C. Lawlor, K. Spencer, T. Mitzel *J. Org. Chem.* **2009**, *74*, 5861-5870.

### 3-(triisopropylsilyl)propionaldehyde (2m)

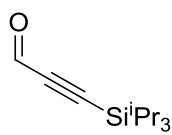

Prepared according to general procedure, starting from triisopropyl(prop-1-yn-1-yl)silane (2.2mL, 10 mmol). Yellow liquid.

Yield: 73% (1.5g).

$^1\text{H NMR}$  (300 MHz,  $\text{CDCl}_3$ )  $\delta$  9.23 (s, 0H), 1.13 (d,  $J = 5.5$ , 18H).

### D) General Procedure for the Cross-Aldol reactions

To a solution of the amine catalyst (0.1 mmol, 20 mol %) in THF (0.5 mL) at  $-60^\circ\text{C}$  were successively added the corresponding donor aldehyde (0.6 mmol, 1.2 equiv.)<sup>16</sup> the Brønsted acid (0.1 mmol, 20 mol %), CuI (0.05 mmol, 10 mol %) and the ynal (0.5 mmol, 1 equiv.). The resulting solution was stirred at  $-60^\circ\text{C}$  for 20 h, and the reaction product was isolated either as alcohol or as acetal following the procedures described below.

The diastereoselectivity of the process was determined by  $^1\text{H-NMR}$  analysis of an aliquot by integration of the corresponding signals in the aldehyde region before reduction of the intermediate aldehyde adduct.<sup>17</sup> The ratio of isomers does not change after reduction of the adduct at the indicated temperature.<sup>18</sup> Finally this diastereomer ratio was also confirmed by HPLC analysis in the diol compound.

The corresponding racemic compounds were prepared according to this same procedure, but using *rac*-**4** as the catalyst.

A) Isolation of the reaction product as alcohol: To the above mixture, a suspension of  $\text{NaBH}_4$  (4.5 mmol, 8 equiv.) in EtOH (1 mL) was added drop-wise at  $-60^\circ\text{C}$ , and after reaction completion (monitored by  $^1\text{H-NMR}$ ), typically (typically 30–60 min), the mixture was quenched with brine (4 mL), and allowed to reach room temperature. After extraction with  $\text{CH}_2\text{Cl}_2$  (3 x 6 mL), the combined organic phases were washed with brine,

<sup>16</sup> For the reactions with propanal a threefold excess of aldehyde was employed.

<sup>17</sup> In some particular cases because of peak overlapping in the aldehyde region the dr was determined by integration of  $\text{CH}_2\text{OH}$ .

<sup>18</sup> Partial epimerization has been observed when the reduction is performed at higher temperatures.

dried over  $\text{MgSO}_4$ , and concentrated under reduced pressure. The resulting crude was purified over silicagel by flash column chromatography to afford the expected adducts.

B) Isolation of the reaction product as dimethyl acetals: To the above mixture 4.5 mL of MeOH, trimethyl orthoformate (0.16 mL, 1.5 mmol) and *p*-toluenesulfonic acid (20.0 mg, 0.1 mmol, 20 mol%) were successively added at  $-60^\circ\text{C}$  and the mixture was allowed to reach room temperature. After 2 h of stirring, the reaction was quenched with  $\text{NaHCO}_3$  sat. (5 mL) and extracted with ethyl acetate (2 x 4 mL). The combined organic layers were washed with brine, dried over  $\text{MgSO}_4$  and concentrated. The residue was purified by flash column chromatography on silica gel to afford the expected adducts.<sup>19</sup>

---

<sup>19</sup> Procedure adapted from, T. Kano, Y. Yamaguchi, Y. Tanaka, K. Maruoka, *Angew. Chem. Int. Ed.* **2007**, *46*, 1738.

## E) Reaction Scope

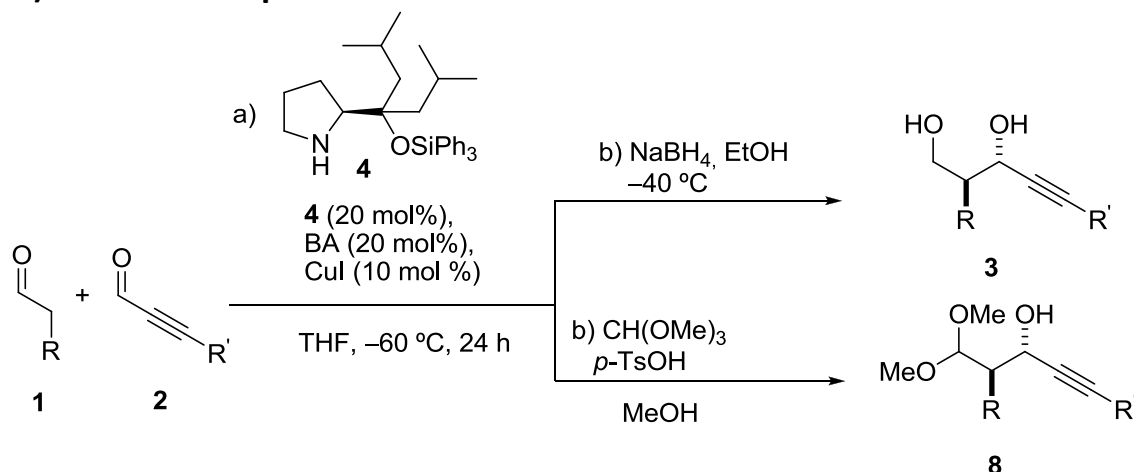

**Table S1:** Functionalized *anti* Propargylic Alcohols<sup>a</sup>

| Entry | R                                                               | R'                                                | Product    | Yield % <sup>b</sup> | <i>anti:syn</i> <sup>c</sup> | ee% <sup>d</sup> |
|-------|-----------------------------------------------------------------|---------------------------------------------------|------------|----------------------|------------------------------|------------------|
| 1     | CH <sub>2</sub> Ph                                              | (CH <sub>2</sub> ) <sub>4</sub> CH <sub>3</sub>   | <b>8Aa</b> | 72                   | >20:1 (7.8:1)                | 99               |
| 2     | CH <sub>2</sub> Ph                                              | (CH <sub>2</sub> ) <sub>2</sub> CH <sub>3</sub>   | <b>3Ab</b> | 68                   | 16:1                         | 99               |
| 3     | CH <sub>2</sub> Ph                                              | (CH <sub>2</sub> ) <sub>2</sub> Ph                | <b>3Ad</b> | 75                   | 19:1                         | 94               |
| 4     | CH <sub>2</sub> Ph                                              | <i>c</i> -C <sub>6</sub> H <sub>11</sub>          | <b>3Ae</b> | 73                   | >20:1 (5.9:1) <sup>e</sup>   | 93               |
| 5     | CH <sub>2</sub> Ph                                              | Ph                                                | <b>3Af</b> | 84                   | 9:1                          | 94               |
| 6     | CH <sub>2</sub> Ph                                              | Ph                                                | <b>8Af</b> | 64                   | 8.5:1                        | 94               |
| 7     | CH <sub>2</sub> Ph                                              | 4-OMeC <sub>6</sub> H <sub>4</sub>                | <b>3Ag</b> | 55                   | 10.2:1                       | 92               |
| 8     | CH <sub>2</sub> Ph                                              | 3-Cl C <sub>6</sub> H <sub>4</sub>                | <b>3Ah</b> | 74                   | 7.2:1                        | 91               |
| 8     | CH <sub>2</sub> Ph                                              | CH(OEt) <sub>2</sub>                              | <b>3Ai</b> | 60                   | 14:1                         | 94               |
| 9     | CH <sub>2</sub> Ph                                              | (CH <sub>2</sub> ) <sub>3</sub> Cl                | <b>3Aj</b> | 65                   | 20:1                         | 99               |
| 10    | CH <sub>3</sub>                                                 | (CH <sub>2</sub> ) <sub>2</sub> Ph                | <b>3Bd</b> | 75                   | 19:1                         | >99              |
| 11    | CH <sub>3</sub>                                                 | Ph                                                | <b>3Bf</b> | 73                   | 5:1                          | 94               |
| 12    | CH <sub>3</sub>                                                 |                                                   | <b>3Bk</b> | 50                   | 9:1                          | 99               |
| 13    | CH <sub>3</sub>                                                 | (CH <sub>2</sub> ) <sub>3</sub> OPMB              | <b>3Cl</b> | 71                   | 9:1                          | 99               |
| 14    | CH(CH <sub>3</sub> ) <sub>2</sub>                               | (CH <sub>2</sub> ) <sub>4</sub> CH <sub>3</sub>   | <b>3Ca</b> | 71                   | 20:1                         | 99               |
| 15    | CH(CH <sub>3</sub> ) <sub>2</sub>                               | Ph                                                | <b>8Cf</b> | 64                   | 9:1                          | 98               |
| 16    | (CH <sub>2</sub> ) <sub>2</sub> CO <sub>2</sub> <sup>t</sup> Bu | <i>c</i> -C <sub>6</sub> H <sub>11</sub>          | <b>3De</b> | 69                   | >20:1(5.4:1) <sup>e</sup>    | 99               |
| 17    | (CH <sub>2</sub> ) <sub>4</sub> NHBoc                           | (CH <sub>2</sub> ) <sub>2</sub> Ph                | <b>3Ed</b> | 71                   | 13:1                         | 95               |
| 18    | CH <sub>2</sub> CH=CH <sub>2</sub>                              | (CH <sub>2</sub> ) <sub>2</sub> CH <sub>3</sub>   | <b>3Fb</b> | 50                   | >20:1                        | 91               |
| 19    | CH <sub>2</sub> CH=CH <sub>2</sub>                              | Ph                                                | <b>8Ff</b> | 84                   | 18:1                         | 94               |
| 21    | CH <sub>2</sub> CH=CH <sub>2</sub>                              | Si <sup>i</sup> Pr <sub>3</sub>                   | <b>8Fm</b> | 70                   | 20:1                         | 99               |
| 21    | (CH <sub>2</sub> ) <sub>3</sub> CH(OMe) <sub>2</sub>            | Ph                                                | <b>8Gf</b> | 51                   | >20:1                        | 99               |
| 22    |                                                                 | CH <sub>2</sub> CH(CH <sub>3</sub> ) <sub>2</sub> | <b>3Hc</b> | 61                   | >20:1(6:1) <sup>e</sup>      | 99               |

<sup>a</sup>Reactions conducted on a 0.5 mmol scale in 0.5 mL of THF (mol ratio **1/2/4/BA/CuI**, 1.5-1.2:1:0.2: 0.2:0.1). <sup>b</sup> Combined yield of the *anti:syn* cross aldol mixture after chromatography. <sup>c</sup> Determined by <sup>1</sup>H-NMR and corroborated by HPLC; data in parentheses refer to reactions carried out with benzoic acid as the sole cocatalyst. <sup>d</sup> Determined by chiral HPLC. <sup>e</sup> NO reactions using either CuCl or CuI as the sole catalyst.



### (2S,3S)-2-Benzyldec-4-yne-1,3-diol (3Aa)

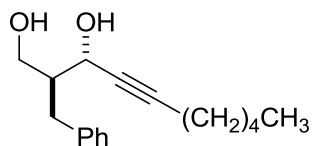

Prepared according to the General Procedure starting from hydrocinnamaldehyde **1A** (0.2 mL, 1.5 mmol) and 2-octynal **2a** (71  $\mu$ L, 0.5 mmol). The title compound was obtained as a 9.8:1 mixture of *anti:syn* isomers. The crude material was purified by flash column chromatography on silica gel (eluting with hexane/ ethyl acetate 80/20) to give the title compound as a colorless oil. Yield: 83 % (107 mg).  $[\alpha]_D^{22} = -4.18$  ( $c = 0.1$ , 93 % ee,  $\text{CH}_2\text{Cl}_2$ ).  $^1\text{H}$  NMR (300 MHz,  $\text{CDCl}_3$ )  $\delta = 7.37$  (s, 5H), 4.52 (d,  $J = 9.1$  Hz, 1H), 4.05 (d,  $J = 3.2$  Hz, 1H), 3.70 (dd,  $J = 11.1, 5.6$  Hz, 1H), 3.01 (dd,  $J = 13.7, 6.2$  Hz, 1H), 2.83 – 2.65 (m, 1H), 2.29 (dtd,  $J = 9.1, 7.0, 2.0$  Hz, 4H), 2.06 (dtd,  $J = 14.6, 5.7, 3.2$  Hz, 1H), 1.68 – 1.50 (m, 1H), 1.45 – 1.28 (m, 2H), 0.99 – 0.89 (m, 3H).  $^{13}\text{C}$  NMR (75 MHz,  $\text{CDCl}_3$ )  $\delta = 140.3, 129.6, 128.8, 126.6, 77.8, 77.4, 77.0, 65.8, 63.7, 48.5, 34.5, 31.5, 30.7, 28.7, 22.6, 19.1, 14.3$ . MS (ESI,  $m/z$ ): calcd for  $\text{C}_{17}\text{H}_{24}\text{O}_2$  ( $\text{M}, \text{H}^+$ ), 261.1810; found, 265.1798.

The enantiomeric purity of the major diastereoisomer was determined by HPLC analysis (Daicel Chiralpak IC, hexane/isopropanol 95/5, flow rate= 1 mL/min, retention times: 35.5 min (min.) and 47.1 min (major)).

### (2R,3S)-2-benzyl-1,1-dimethoxydec-4-yn-3-ol (8Aa)

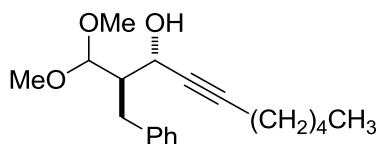

Prepared according to the General Procedure starting from hydrocinnamaldehyde **1A** (0.2 mL, 1.5 mmol) and 2-octynal **2a** (71  $\mu$ L, 0.5 mmol). The title compound was obtained as a 20:1 mixture of *anti:syn* isomers. The crude material was purified by flash column chromatography on silica gel (eluting with hexane/ethyl acetate 90:10) to give the title compound as colourless oil. Yield: 72 % (109 mg).  $[\alpha]_D^{22} = 30.7$  ( $c = 1$ , 99 % ee,  $\text{CH}_2\text{Cl}_2$ ).  $^1\text{H}$  NMR (300 MHz,  $\text{CDCl}_3$ )  $\delta 7.37 - 7.16$  (m, 6H), 4.55 (d,  $J = 3.9$ , 1H), 4.41 (dd,  $J = 7.7, 4.5$ , 1H), 3.47 – 3.44 (m, 3H), 3.41 (s, 4H), 2.93 – 2.79 (m, 2H), 2.21 (ddd,  $J = 9.4, 7.1, 2.9$ , 3H), 1.51 (dt,  $J = 14.0, 7.0$ , 2H), 1.44 – 1.28 (m, 5H), 0.89 (t,  $J = 7.1$ , 3H).  $^{13}\text{C}$  NMR (75 MHz,  $\text{CDCl}_3$ )  $\delta 140.4, 129.5, 128.6, 126.2, 107.1, 86.8, 80.3, 62.3, 56.4, 55.5, 48.6, 31.2, 28.5, 22.4, 18.9, 14.2$ . MS (ESI,  $m/z$ ): calcd for  $\text{C}_{19}\text{H}_{28}\text{O}_3$  ( $\text{M}, \text{H}^+$ ), 304.4238; found ( $\text{M} - \text{CH}_3\text{O}$ ), 273.185.

The enantiomeric purity of the major diastereoisomer was determined by HPLC analysis (Daicel Chiralpak IC, hexane/isopropanol 95/5, flow rate= 1 mL/min, retention times: 14.0 min (major.) and 31.6 min (min)).

### (2S,3S)-2-benzyl-4-yne-1,3-diol (3Ab)

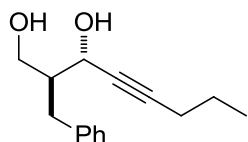

Prepared according to the General Procedure starting from hydrocinnamaldehyde **1A** (0.2 mL, 1.5 mmol) and 2-hexynal **2b** (48mg, 0.5 mmol). The title compound was obtained as a 20:1 mixture of *anti:syn* isomers. The crude material was purified by flash column chromatography on silica gel (eluting with hexane/ethyl acetate 90:10) to give the title compound as a colorless oil. Yield: 68 % (78 mg).  $[\alpha]_D^{22} = 15.7$  ( $c = 1$ , 99 % ee,  $\text{CH}_2\text{Cl}_2$ ).  $^1\text{H}$  NMR (300 MHz,  $\text{CDCl}_3$ )  $\delta$  7.37 – 7.20 (m, 5H), 4.53 (t,  $J = 5.2$  Hz, 1H), 4.10 – 3.98 (m, 1H), 3.71 (dt,  $J = 10.7, 5.3$  Hz, 1H), 3.01 (dd,  $J = 13.7, 6.3$  Hz, 1H), 2.80 – 2.69 (m, 1H), 2.26 (td,  $J = 7.0, 2.0$  Hz, 2H), 2.16 – 2.02 (m, 2H), 1.64 – 1.55 (m, 4H), 1.08 – 0.98 (m, 3H). MS (ESI,  $m/z$ ): calcd for  $\text{C}_{15}\text{H}_{21}\text{O}_2$  ( $\text{M}, \text{H}^+$ ), 233.1542; found ( $\text{M}-\text{CH}_3\text{O}$ ), 233.1541.

The enantiomeric purity of the major diastereoisomer was determined by HPLC analysis (Daicel Chiralpak IC, hexane/isopropanol 95/5, flow rate= 1 mL/min, retention times: 23.0 min (major.) and 33.8 min (min)).

### (2S,3S)-2-Benzyl-7-phenylhept-4-yne-1,3-diol (3Ad)

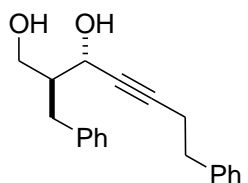

Prepared according to the General Procedure starting from hydrocinnamaldehyde **1A** (99  $\mu\text{L}$ , 0.75 mmol) and 5-phenylpent-2-ynal **2d** (79 mg, 0.5 mmol). The title compound was obtained as a 19:1 mixture of *anti:syn* isomers. The crude material was purified by flash column chromatography on silica gel (eluting with hexane/ ethyl acetate 80/20) to give the title compound as a colourless oil. Yield: 75% (111 mg).  $[\alpha]_D^{23} = -4.38$  ( $c=1$ , 94 % ee,  $\text{CH}_2\text{Cl}_2$ ).  $^1\text{H}$  NMR (400 MHz,  $\text{CDCl}_3$ )  $\delta$  = 7.35 – 7.22 (m, 5H), 4.48 (m, 1H), 3.94 (dd,  $J=10.8, 3.2$  Hz, 1H), 3.61 (dd,  $J=10.8, 5.6$  Hz, 1H), 3.12 (brs, 1H), 2.95 (dd,  $J=14.0, 6.0$  Hz, 1H), 2.87 (t,  $J=7.4$  Hz, 2H), 2.67 (dd,  $J=14.0, 9.0$  Hz, 1H), 2.58 (dt,  $J=7.4, 2.0$  Hz, 2H), 2.02 – 1.98 (m, 1H).  $^{13}\text{C}$  NMR (100 MHz,  $\text{CDCl}_3$ )  $\delta$  = 140.5, 139.9, 129.2, 128.5, 128.4, 126.4,

126.2, 86.1, 81.1, 65.2, 63.2, 47.9, 34.9, 34.0, 20.8. MS (ESI,  $m/z$ ): calcd for  $C_{20}H_{22}O_2$  (M,  $H^+$ ), 295.1610; found, 295.1615.

The enantiomeric purity of the major diastereoisomer was determined by HPLC analysis (Daicel Chiralpak AS-H hexane/isopropanol 90/10, flow rate= 1 mL/min, retention times: 20.7 min (major.) and 28.6 min (min.)).

### (2*S*,3*S*)-2-Benzyl-5-cyclohexylpent-4-yne-1,3-diol (3Ae)

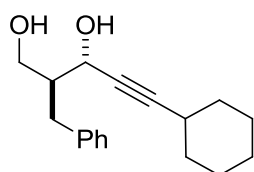

Prepared according to the General Procedure starting from hydrocinnamaldehyde **1A** (0.2 mL, 1.5 mmol) and 3-cyclohexylpropionaldehyde **2e** (68 mg, 0.5 mmol). The title compound was obtained as a 20:1 mixture of *anti:syn* isomers.

The crude material was purified by flash column chromatography on silica gel (eluting with hexane/ ethyl acetate 90/10) to give the title compound as a colourless oil. Yield: 73% (100 mg).  $[\alpha]_D^{24} = -4.6$  ( $c=0.85$ , 93 % ee,  $CH_2Cl_2$ ).  $^1H$  NMR (300 MHz,  $CDCl_3$ )  $\delta = 7.49 - 7.12$  (m, 5H), 4.53 (td,  $J=5.0$ , 1.5 Hz, 1H), 4.10 – 3.97 (m, 1H), 3.70 (dt,  $J=10.8$ , 5.3 Hz, 1H), 3.01 (dd,  $J=13.7$ , 6.2 Hz, 1H), 2.74 (dd,  $J=13.7$ , 8.8 Hz, 1H), 2.60 (d,  $J=5.2$  Hz, 1H), 2.47 (ddd,  $J=7.3$ , 5.3, 2.7 Hz, 1H), 2.30 (d,  $J=5.1$  Hz, 1H), 2.06 (ddd,  $J=11.7$ , 5.8, 2.8 Hz, 1H), 1.89 – 1.25 (m, 10H).  $^{13}C$  NMR (75 MHz,  $CDCl_3$ )  $\delta = 139.9$ , 129.2, 128.5, 126.2, 91.3, 80.1, 65.3, 63.2, 48.2, 34.1, 32.6, 29.0, 25.8, 24.8. MS (ESI,  $m/z$ ): calcd for  $C_{18}H_{24}O_2$  (M,  $H^+$ ), 273.1810; found, 273.1814.

The enantiomeric purity of the major diastereoisomer was determined by HPLC analysis (Daicel Chiralpak IC hexane/isopropanol 90/10, flow rate= 1 mL/min, retention times: 18.9 min (min.) and 24.3 min (major.)).

### (2*S*,3*S*)-2-Benzyl-5-phenylpent-4-yne-1,3-diol (3Af)

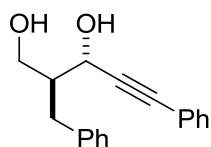

Prepared according to the General Procedure starting from hydrocinnamaldehyde **1A** (0.2 mL, 1.5 mmol) and phenylpropionaldehyde **2f** (61  $\mu$ L, 0.5 mmol). The title compound was obtained as a 9:1 mixture of *anti:syn* isomers. The crude material was

purified by flash column chromatography on silica gel (eluting with hexane/ ethyl acetate 80/20) to give the title compound as a white solid. Yield: 84 % (112 mg).  $[\alpha]_D^{25} = -$

4.3 ( $c=1$ , 94 % ee,  $\text{CH}_2\text{Cl}_2$ ). M.p.: 82-85 °C.  $^1\text{H}$  NMR (300 MHz,  $\text{CDCl}_3$ )  $\delta$  = 7.60 – 7.11 (m, 10H), 4.76 (d,  $J=4.2$  Hz, 1H), 4.15 (dd,  $J=11.0$ , 3.1 Hz, 1H), 3.78 (dd,  $J=11.0$ , 5.3 Hz, 1H), 3.10 (dd,  $J=13.8$ , 6.4 Hz, 1H), 2.84 (dd,  $J=13.8$ , 8.7 Hz, 1H), 2.25 – 2.13 (m, 1H).  $^{13}\text{C}$  NMR (75 MHz,  $\text{CDCl}_3$ )  $\delta$  = 140.1, 132.1, 129.6, 128.9, 128.7, 126.7, 122.9, 89.5, 86.7, 65.9, 63.7, 48.3, 34.5. MS (ESI,  $m/z$ ): calcd for  $\text{C}_{18}\text{H}_{18}\text{O}_2$  ( $\text{M}, \text{H}^+$ ), 267.1340; found, 267.1319.

The enantiomeric purity of the major diastereoisomer was determined by HPLC analysis (Daicel Chiralpak AS-H hexane/isopropanol 90/10, flow rate= 1 mL/min, retention times: 14.1 min (major.) and 17.2 min (min)).

### (3S,4R)-4-Benzyl-5,5-dimethoxy-1-phenylpent-1-yn-3-ol (8Af)

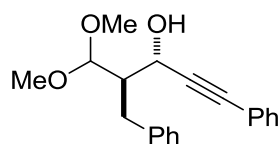

Prepared according to the General Procedure starting from hydrocinnamaldehyde **1A** (0.2 mL, 1.5 mmol) and phenylpropionaldehyde **2f** (61  $\mu\text{L}$ , 0.5 mmol). The title

compound was obtained as a 8.5:1 mixture of *anti:syn* isomers. The crude material was purified by flash column chromatography on silica gel (eluting with hexane/ ethyl acetate 90/10) to give the title compound as a yellow oil. Yield: 64 % (591 mg).  $[\alpha]_D^{24} = 1.11$  ( $c=1$ , 94% ee,  $\text{CH}_2\text{Cl}_2$ ).  $^1\text{H}$  NMR (300 MHz,  $\text{CDCl}_3$ )  $\delta$  7.43 (dd,  $J = 6.7$ , 3.1 Hz, 1H), 7.35 – 7.20 (m, 8H), 4.69 – 4.64 (m, 1H), 4.64 – 4.62 (m, 1H), 3.49 (s, 3H), 3.46 (s, 3H), 2.95 (qd,  $J = 13.9$ , 7.2 Hz, 2H), 2.39 – 2.29 (m, 1H).  $^{13}\text{C}$  NMR (75 MHz,  $\text{CDCl}_3$ )  $\delta$  140.1, 131.8, 129.5, 129.2, 128.7, 128.5, 128.4, 126.4, 107.1, 89.4, 85.9, 62.5, 56.5, 55.7, 48.6, 31.2. MS (ESI,  $m/z$ ): calcd for  $\text{C}_{20}\text{H}_{22}\text{O}_3$  ( $\text{M}, \text{H}^+$ ), 310.3869; found 310.1568.

The enantiomeric purity of the major diastereoisomer was determined by HPLC analysis (Daicel Chiralpak IC hexane/isopropanol 98/2, flow rate= 0.5 mL/min, retention times: 30.9 min (min.) and 36.9 min (major)).

### (2S,3S)-2-Benzyl-5-(4-methoxyphenyl) pent-4-yne-1,3-diol (3Ag)

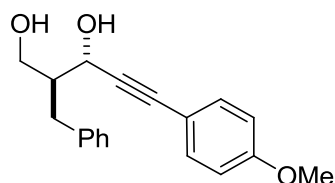

Prepared according to the General Procedure starting from hydrocinnamaldehyde **1A** (0.2 mL, 1.5 mmol) and 3-(4-methoxyphenyl) propionaldehyde **2g** (80 mg, 0.5 mmol). The title compound was obtained as a 10.2:1 mixture of *anti:syn*

isomers. The crude material was purified by flash column chromatography on silica gel

(eluting with hexane/ ethyl acetate 90/10) to give the title compound as a white solid. M.p: 120-123 °C. Yield: 55 % (81 mg).  $[\alpha]_D^{24} = -3.2$  ( $c=0.80$ , 92 % ee,  $\text{CH}_2\text{Cl}_2$ ).  $^1\text{H}$  NMR (300 MHz,  $\text{CDCl}_3$ )  $\delta$  7.48 – 7.20 (m, 7H), 6.95 – 6.82 (m, 2H), 4.75 (t,  $J = 5.1$  Hz, 1H), 4.14 (d,  $J = 10.9$  Hz, 1H), 3.85 (s, 3H), 3.82 – 3.72 (m, 1H), 3.08 (dd,  $J = 13.8, 6.4$  Hz, 1H), 2.83 (dd,  $J = 13.7, 8.7$  Hz, 2H), 2.23 – 2.15 (m, 1H).  $^{13}\text{C}$  NMR (75 MHz,  $\text{CDCl}_3$ )  $\delta$  139.8, 133.2, 129.2, 128.5, 126.2, 114.5, 114.0, 87.7, 86.3, 65.6, 63.3, 55.3, 48.0, 34.1. MS (ESI,  $m/z$ ): calcd for  $\text{C}_{19}\text{H}_{20}\text{O}_2$  (M,  $\text{H}^+$ ), 297.1446; found, 297.1429.

The enantiomeric purity of the major diastereoisomer was determined by HPLC analysis (Daicel Chiralpak AS-H hexane/isopropanol 90/10, flow rate= 1 mL/min, retention times: 28.0 min (major.) and 31.1 min (min.)).

### (2S,3S)-2-Benzyl-5-(4-chlorophenyl)pent-4-yne-1,3-diol (3Ah)

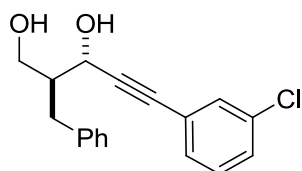

Prepared according to the General Procedure starting from hydrocinnamaldehyde **1A** (0.2 mL, 1.5 mmol) and *m*-chlorophenylpropynal **2h** (72 mg, 0.5 mmol). The crude material was purified by flash column chromatography on silica gel (eluting with hexane/ EtOAc 90/10) to give the title compound as a colourless oil. Yield: 74% (111 mg).  $[\alpha]_D^{24} = -5.7$  ( $c=0.82$ , 91% ee,  $\text{CH}_2\text{Cl}_2$ ).  $^1\text{H}$  NMR (300 MHz,  $\text{CDCl}_3$ )  $\delta$  7.36 – 7.20 (m, 9H), 4.75 (d,  $J = 5.2$  Hz, 1H), 4.22 – 4.12 (m, 1H), 3.78 (dd,  $J = 11.0, 5.3$  Hz, 1H), 3.08 (dd,  $J = 13.8, 6.5$  Hz, 1H), 2.84 (dd,  $J = 14.0, 8.5$  Hz, 1H), 2.23 – 2.13 (m, 1H).  $^{13}\text{C}$  NMR (75 MHz,  $\text{CDCl}_3$ )  $\delta$  139.6, 134.1, 131.5, 129.8, 129.5, 129.1, 128.7, 128.5, 126.3, 124.2, 90.4, 84.7, 65.3, 63.2, 47.7, 34.1. MS (ESI,  $m/z$ ): calcd for  $\text{C}_{18}\text{H}_{17}\text{ClO}_2$  (M,  $\text{H}^+$ ), 302.0888; found, 302.0898.

The enantiomeric purity of the major diastereoisomer was determined by HPLC analysis (Daicel Chiralpak AS-H hexane/isopropanol 90/10, flow rate= 1 mL/min, retention times: 11.7min (mayor.) and 14.0min (min.)).

### (2S,3S)-2-Benzyl-6,6-diethoxyhex-4-yne-1,3-diol (3Ai)

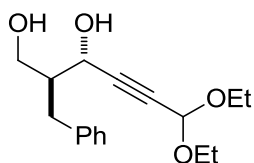

Prepared according to the General Procedure starting from hydrocinnamaldehyde **1A** (99  $\mu\text{L}$ , 0.75 mmol) and 4,4-diethoxybut-2-ynal **2i** (78 mg, 0.5 mmol). The title compound was obtained as a 14:1 mixture of *anti:syn* isomers. The crude material was purified by flash column

chromatography on silica gel (eluting with hexane/ ethyl acetate 80/20) to give the title compound as a yellow oil. Yield: 60% (88 mg).  $[\alpha]_D^{25} = -1.7$  ( $c=1$ , 94 % ee,  $\text{CH}_2\text{Cl}_2$ ).  $^1\text{H}$  NMR (400 MHz,  $\text{CDCl}_3$ )  $\delta = 7.32 - 7.20$  (m, 5H), 5.33 (d,  $J=1.2$  Hz, 1H), 4.57 (d,  $J=4.9$ , 1H), 4.03 (dd,  $J=3.1, 11.0$  Hz, 1H), 3.81-3.72 (m, 3H), 3.69-3.57 (m, 3H), 2.99 (dd,  $J=6.3, 13.7$  Hz, 1H), 2.74 (dd,  $J=8.7, 13.7$  Hz, 1H), 2.09 – 2.02 (m, 1H), 1.25 (t,  $J=7.1$  Hz, 6H).  $^{13}\text{C}$  NMR (100 MHz,  $\text{CDCl}_3$ )  $\delta = 139.6, 129.1, 128.4, 126.1, 91.2, 85.6, 81.1, 64.5, 62.7, 61.0, 47.4, 33.9, 14.9$ . MS (ESI,  $m/z$ ): calcd for  $\text{C}_{17}\text{H}_{24}\text{O}_4$  (M,  $\text{H}^+$ ), 293,1712; found, 293,1716.

The enantiomeric purity of the major diastereoisomer was determined by HPLC analysis (Phenomenex Lux  $3\mu$  Cellulose-4 hexane/isopropanol 93/7, flow rate= 1 mL/min, retention times: 35.8 min (min.) and 48.8 min (major.)).

### (2S,3S)-2-Benzyl-8-chlorooct-4-yne-1,3-diol (3Aj)

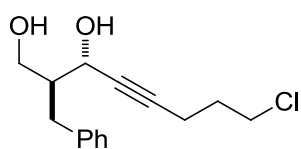

Prepared according to the General Procedure starting from hydrocinnamaldehyde **1A** (0.13 mL, 1 mmol) and 6-chlorohex-2-ynal **2j** (65.3 mg, 0.5 mmol). The title compound was obtained as a 20:1 mixture of *anti:syn* isomers. The crude material was purified by flash column chromatography on silica gel (eluting with hexane/ ethyl acetate 80/20) to give the title compound as a colourless oil. Yield: 65% (85 mg).  $[\alpha]_D^{25} = +0.25$  ( $c=1$ , 99 % ee,  $\text{CH}_2\text{Cl}_2$ ).  $^1\text{H}$  NMR (300 MHz,  $\text{CDCl}_3$ )  $\delta 7.46 - 7.19$  (m, 6H), 4.51 (s, 1H), 4.04 (d,  $J = 10.8$ , 1H), 3.67 (t,  $J = 6.3$ , 3H), 2.99 (dd,  $J = 13.7, 6.2$ , 2H), 2.73 (dd,  $J = 13.7, 8.7$ , 1H), 2.46 (td,  $J = 6.8, 1.9$ , 2H), 2.11 – 1.94 (m, 3H).  $^{13}\text{C}$  NMR (75 MHz,  $\text{CDCl}_3$ )  $\delta 139.9, 129.3, 128.6, 126.4, 85.0, 81.5, 65.4, 63.4, 48.0, 43.8, 34.2, 31.4, 16.3$ . MS (ESI,  $m/z$ ): calcd for  $\text{C}_{15}\text{H}_{19}\text{ClO}_2$  (M,  $\text{H}^+$ ), 266,76; found 266.75.

The enantiomeric purity of the major diastereoisomer was determined by HPLC analysis (Daicel Chiralpak AD-H hexane/isopropanol 98/2, flow rate= 1 mL/min, retention times: 100 min (mayor.) and 115 min (min.)).

### (2S,3S)-2-Methyl-7-phenylhept-4-yne-1,3-diol (3Bd)

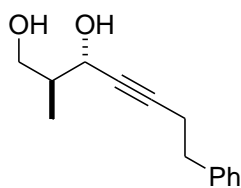

Prepared according to the General Procedure starting from propionaldehyde **1B** (0.11 ml, 1.5 mmol) and 5-phenylpent-2-ynal **2d** (79 mg, 0.5 mmol). The title compound was obtained as a 19:1 mixture of *anti:syn* isomers. The crude material was purified by flash column chromatography on silica gel (eluting with hexane/ ethyl acetate 80/20) to give the title compound as a colourless oil. Yield: 75% (82 mg).  $[\alpha]_D^{25} = +3.7$  ( $c=0.2$ , 99.8 % ee,  $\text{CH}_2\text{Cl}_2$ ).  $^1\text{H}$  NMR (400 MHz,  $\text{CDCl}_3$ )  $\delta = 7.34 - 7.21$  (m, 5H), 4.36 (dt,  $J=6.9, 1.9$  Hz, 1H), 3.76 (dd,  $J=11.0, 3.9$  Hz, 1H), 3.60 (dd,  $J=11.0, 7.2$  Hz, 1H), 2.86 (t,  $J=7.4$  Hz, 2H), 2.56 (td,  $J=7.4, 1.9$  Hz, 2H), 1.98 – 1.88 (m, 1H), 0.97 (d,  $J=7.0$  Hz, 3H).  $^{13}\text{C}$  NMR (100 MHz,  $\text{CDCl}_3$ )  $\delta = 140.5, 128.5, 128.4, 126.3, 85.7, 80.8, 67.1, 66.5, 41.4, 35.0, 20.8, 13.0$ . MS (ESI,  $m/z$ ): calcd for  $\text{C}_{14}\text{H}_{18}\text{O}_2$  (M,  $\text{H}^+$ ), 219,1311; found, 219,1315.

The enantiomeric purity of the major diastereoisomer was determined by HPLC analysis (Daicel Chiralpak AY-H hexane/isopropanol 95/5, flow rate= 1 mL/min, retention times: 26.5 min (major.) and 35.4 min (minor.)).

### (2S,3S)-2-Methyl-5-phenylpent-4-yne-1,3-diol (3Bf)

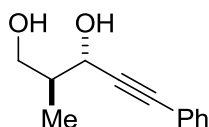

Prepared according to the General Procedure starting from propanal **1B** (0.11 mL, 1.5 mmol) and phenylpropionaldehyde **2f** (61  $\mu\text{L}$ , 0.5 mmol). The title compound was obtained as a 5:1 mixture of *anti:syn* isomers. The crude material was purified by flash column chromatography on silica gel (eluting with hexane/ ethyl acetate 80/20) to give the title compound as a yellow oil. Yield: 73% (69 mg).  $[\alpha]_D^{22} = +4.09$  ( $c= 0.25$ , 94 % ee,  $\text{CH}_2\text{Cl}_2$ ).  $^1\text{H}$  NMR (300 MHz,  $\text{CDCl}_3$ )  $\delta = 7.54 - 7.28$  (m, 5H), 4.67 (d,  $J=6.8$  Hz, 1H), 3.94 (dd,  $J=10.9, 4.0$  Hz, 1H), 3.76 (dd,  $J=10.9, 7.0$  Hz, 1H), 2.20 – 2.07 (m, 1H), 1.14 (d,  $J=7.0$  Hz, 3H).  $^{13}\text{C}$  NMR (75 MHz,  $\text{CDCl}_3$ )  $\delta = 131.7, 128.4, 122.5, 88.0, 86.2, 66.9, 65.8, 40.4, 12.3$ . MS (ESI,  $m/z$ ): calcd for  $\text{C}_{12}\text{H}_{14}\text{O}_2$  (M,  $\text{H}^+$ ), 191.0994; found, 191.0986.

The enantiomeric purity of the major diastereoisomer was determined by HPLC analysis (Daicel Chiralpak IC, hexane/isopropanol 90/10, flow rate= 1 mL/min, retention times: 13.7 min (min.) and 15.6 min (major)).

### (2S,3S)-2-Methyl-5-(thiophen-3-yl)pent-4-yne-1,3-diol (3Bk)

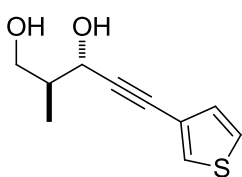

Prepared according to the General Procedure starting from propanal **1B** (0.11 mL, 1.5 mmol) and 3-(thiophen-3-yl)propiolaldehyde **2k** (52 mg, 0.5 mmol). The title compound was obtained as a 9:1 mixture of *anti:syn* isomers. The crude material was purified by flash column chromatography on silica gel (eluting with hexane/ ethyl acetate 70/30) to give the title compound as a yellow oil. Yield: 50% (49mg).  $[\alpha]_D^{25} = +6.5$  ( $c=1$ , 99 % ee,  $\text{CH}_2\text{Cl}_2$ ).  $^1\text{H}$  NMR (300 MHz,  $\text{CDCl}_3$ )  $\delta$  7.49 (dd,  $J = 2.9$ , 1.0 Hz, 1H), 7.39 – 7.23 (m, 1H), 7.14 (dd,  $J = 5.0$ , 1.1 Hz, 1H), 4.65 (s, 1H), 3.96 – 3.91 (m, 1H), 3.80 – 3.70 (m, 1H), 2.72 (d,  $J = 3.9$  Hz, 1H), 2.24 (m, 1H), 2.12 (ddd,  $J = 12.8$ , 6.4, 3.4 Hz, 1H), 1.12 (d,  $J = 7.0$  Hz, 3H).  $^{13}\text{C}$  NMR (75 MHz,  $\text{CDCl}_3$ )  $\delta$  128.8, 127.9, 124.3, 87.4, 66.4, 65.4, 63.4, 40.37, 24.2, 12.1. . MS (ESI,  $m/z$ ): calcd for  $\text{C}_{10}\text{H}_{12}\text{O}_2\text{S}$  (M,  $\text{H}^+$ ), 196.27; found 196.27.

The enantiomeric purity of the major diastereoisomer was determined by HPLC analysis (Daicel Chiralpak IC, hexane/isopropanol 93/7, flow rate= 1.2 mL/min, retention times: 31.9 min (min.) and 41.8 min (major)).

### (2S,3S)-8-((4-Methoxybenzyl)oxy)-2-methyloct-4-yne-1,3-diol (3Bl)

Prepared according to the General Procedure starting from propanal **1B** (0.11 mL, 1.5 mmol) and 6-((4-methoxybenzyl)oxy)hex-2-ynal **2l** (116 mg, 0.5 mmol). The title compound was obtained as a 9:1 mixture of *anti:syn* isomers. The crude material was purified by flash column chromatography on silica gel (eluting with hexane/ ethyl acetate 70/30) to give the title compound as a yellow oil. Yield: 71% (101.1mg).  $[\alpha]_D^{25} = +3.5$  ( $c=1$ , 99 % ee,  $\text{CH}_2\text{Cl}_2$ ).  $^1\text{H}$  NMR (300 MHz,  $\text{CDCl}_3$ )  $\delta$  7.26 (d,  $J = 8.7$ , 2H), 6.88 (d,  $J =$



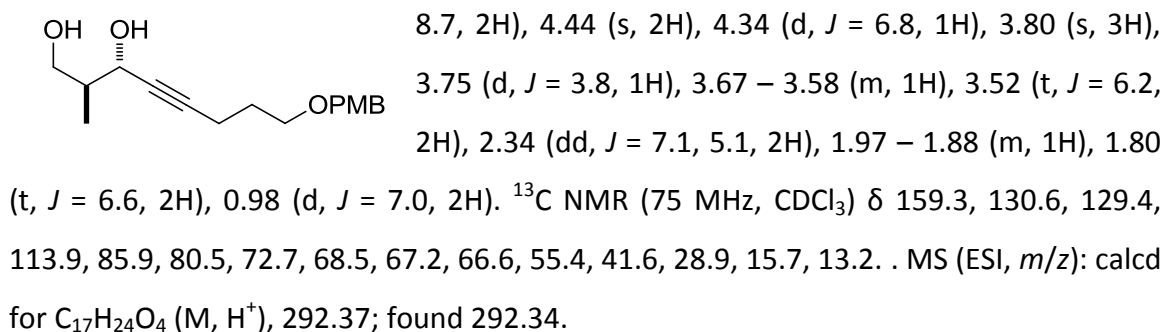

The enantiomeric purity of the major diastereoisomer was determined by HPLC analysis (Daicel Chiralpak OD-H, hexane/isopropanol 95/5, flow rate= 0.75 mL/min, retention times: 46.3 min (min.) and 51.3 min (major)).

### (2S,3S)-2-Isopropyldec-4-yne-1,3-diol (3Ca)

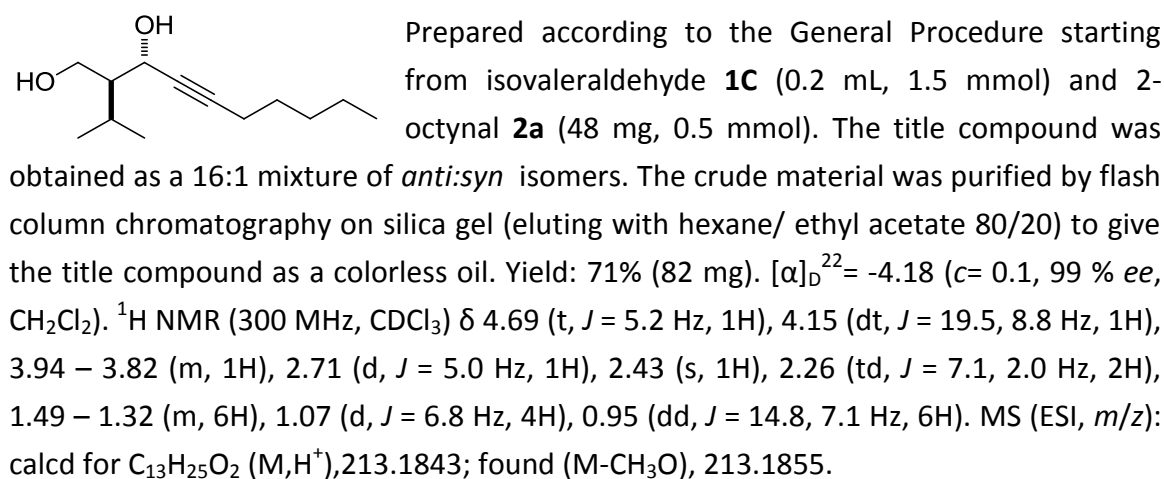

For determination of the *ee*, this adduct was derivatized to the saturated monobenzoate ester as follow.

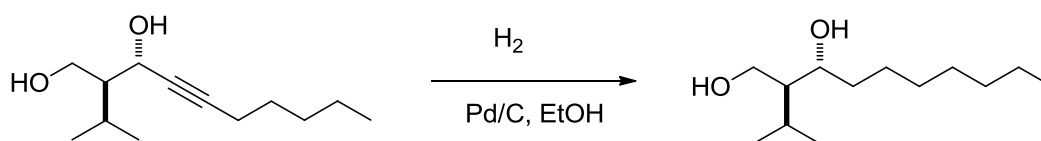

To a 5 mL flask charged with a solution of diol (51 mg, 0.24 mmol) in ethanol (2 mL) was added Pd/C (10% wt, 10 mg). The flask was filled with hydrogen gas and stirred for 16h at rt under hydrogen balloon. The mixture was filtered over celite pad and the filtrate was concentrated. Purification on a silica gel column (hexane/AcOEt, 80:20) provided 31mg of the corresponding saturated diol (31 mg, 0.15 mmol, 62% yield) as a pale yellow oil.  $^1\text{H}$  NMR (300 MHz,  $\text{CDCl}_3$ )  $\delta$  4.02 – 3.81 (m, 3H), 3.81 – 3.69 (m, 1H),

2.01 (dq,  $J = 13.6, 6.8$  Hz, 1H), 1.63 – 1.57 (m, 2H), 1.42 – 1.23 (m, 10H), 1.04 (d,  $J = 6.8$  Hz, 3H), 0.94 (qd,  $J = 6.8, 2.7$  Hz, 6H).  $^{13}\text{C}$  NMR (75 MHz,  $\text{CDCl}_3$ )  $\delta$  77.00, 64.41, 52.98, 39.07, 34.60, 32.43, 32.07, 28.79, 28.59, 25.42, 24.11, 22.22, 16.85.

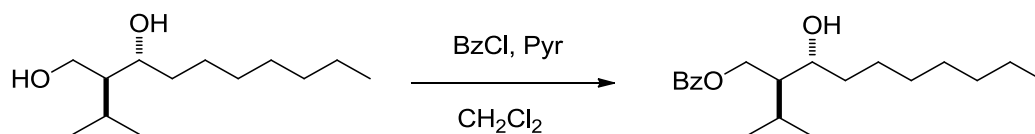

To a solution of the saturated diol (31 mg, 0.15 mmol) in 1.5 mL of  $\text{CH}_2\text{Cl}_2$  – 40 °C was added pyridine (59  $\mu\text{L}$ , 0.732 mmol) and benzoyl chloride (30  $\mu\text{L}$ , 0.30 mmol) at. After stirring for 2 h, this solution was diluted with 10 mL of ethyl acetate, washed with 2  $\times$  10 mL of 0.5 M HCl aqueous solution, dried over  $\text{MgSO}_4$  and concentrated. Purification on a silica gel column (Hexanes/ $\text{AcOEt}$ , 10/1) provided 32 mg of the ester product (0.1 mmol, 67% yield).

The enantiomeric purity of the major diastereoisomer was determined by HPLC analysis (Daicel Chiralpak IC, hexane/ethanol 98/2, flow rate= 1 mL/min, retention times: 15.6 min (major) and 17.6 min (min.)).

### (3*S*,4*R*)-4-(Dimethoxymethyl)-5-methyl-1-phenylhex-1-yn-3-ol (8Cf)

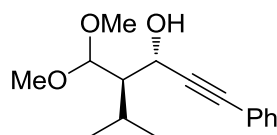

Prepared according to the General Procedure starting from isovaleraldehyde **1c** (0.16 mL, 1.5 mmol) and phenylpropargyl aldehyde **2f** (0.61 mL, 0.5 mmol). The title compound was obtained as a 9:1 mixture of *anti:syn* isomers. The crude material was purified by flash column chromatography on silica gel (eluting with hexane/ ethyl acetate 90/10) to give the title compound as a yellow oil. Yield: 58%. (133 mg)  $[\alpha]_{\text{D}}^{24} = -100.3$  ( $c=1$ , 98 % *ee*,  $\text{CH}_2\text{Cl}_2$ ).  $^1\text{H}$  NMR (300 MHz,  $\text{CDCl}_3$ )  $\delta$  7.44 (dd,  $J = 6.5, 3.1$  Hz, 2H), 7.34 – 7.27 (m, 3H), 4.91 – 4.85 (m, 1H), 4.60 (d,  $J = 4.2$  Hz, 1H), 3.61 (d,  $J = 4.5$  Hz, 1H), 3.46 (d,  $J = 10.4$  Hz, 6H), 2.55 – 2.53 (m, 0H), 2.30 – 2.18 (m, 1H), 1.96 (dt,  $J =$

6.7, 4.2 Hz, 1H), 1.06 (dd,  $J = 11.3, 7.0$  Hz, 7H).  $^{13}\text{C}$  NMR (75 MHz,  $\text{CDCl}_3$ )  $\delta$  131.8, 128.4, 106.9, 62.7, 55.9, 55.0, 51.3, 26.8, 21.4, 20.0. MS (ESI,  $m/z$ ): calcd for  $\text{C}_{16}\text{H}_{22}\text{O}_3$  ( $\text{M}, \text{H}^+$ ), 262.3441; found, 262.1578.

The enantiomeric purity of the major diastereoisomer was determined by HPLC analysis (Daicel Chiralpak IB, hexane/ethanol 95/5, flow rate= 1 mL/min, retention times: 6 min (min) and 7.2 min (major.)).

### (4*S*,5*S*)-*tert*-Butyl-7-cyclohexyl-5-hydroxy-4-(hydroxymethyl)hept-6-ynoate (3De)

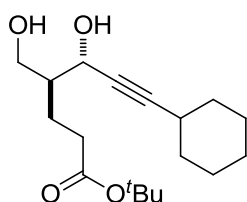

Prepared according to the General Procedure starting from *tert*-Butyl-5-oxopentanoate **1D** (258.3 mg, 1.5 mmol) and 3-cyclohexylpropionaldehyde **2e** (136, 1 mmol). The title compound

was obtained as a 20:1 mixture of *anti:syn* isomers. The crude material was purified by flash column chromatography on silica gel (eluting with hexane/ ethyl acetate 80/20) to give the title compound as a yellow oil. Yield: 52% (160 mg).  $[\alpha]_{\text{D}}^{22} = -7.83$  ( $c = 1.99\%$  ee,  $\text{CH}_2\text{Cl}_2$ ).  $^1\text{H}$  NMR (300 MHz,  $\text{CDCl}_3$ )  $\delta$  4.45 (d,  $J = 3.3$ , 1H), 4.00 – 3.94 (m, 1H), 3.72 – 3.60 (m, 2H), 3.53 – 3.43 (m, 1H), 2.33 (t,  $J = 7.2$ , 3H), 1.86 – 1.63 (m, 9H), 1.42 (s, 12H).  $^{13}\text{C}$  NMR (75 MHz,  $\text{CDCl}_3$ )  $\delta$  173.6, 90.9, 80.7, 80.1, 65.5, 63.1, 45.9, 33.4, 32.7, 29.1, 28.2, 25.9, 24.9, 22.8. MS (ESI,  $m/z$ ): calcd for  $\text{C}_{18}\text{H}_{30}\text{O}_4$  ( $\text{M}, \text{H}^+$ ), 310.4284; found ( $\text{M}-\text{C}_4\text{H}_{10}\text{O}$ ), 237.1491

For determination of the ee, this adduct was derivatized to the saturated monobenzoate ester as for adduct **3Ac**.

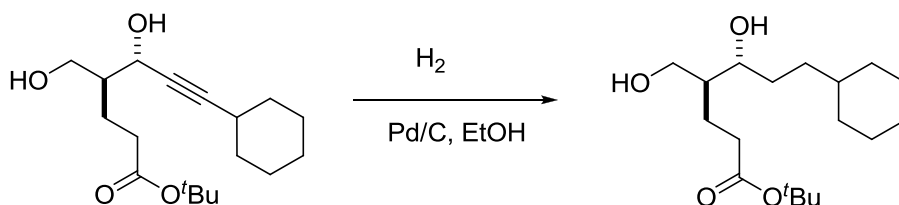

**(4S,5R)-tert-Butyl 7-cyclohexyl-5-hydroxy-4-(hydroxymethyl)heptanoate.**

Yield: Yellow oil. 85 % (63.9 mg)  $^1\text{H}$  NMR (300 MHz,  $\text{CDCl}_3$ )  $\delta$  3.95 (dd,  $J = 11.4, 3.0, 1\text{H}$ ), 3.66 – 3.58 (m, 2H), 2.33 (td,  $J = 7.1, 2.1, 2\text{H}$ ), 1.81 (q,  $J = 7.2, 2\text{H}$ ), 1.69 (s, 7H), 1.58 (d,  $J = 6.8, 3\text{H}$ ), 1.45 (s, 9H), 1.24 (t,  $J = 7.0, 4\text{H}$ ).

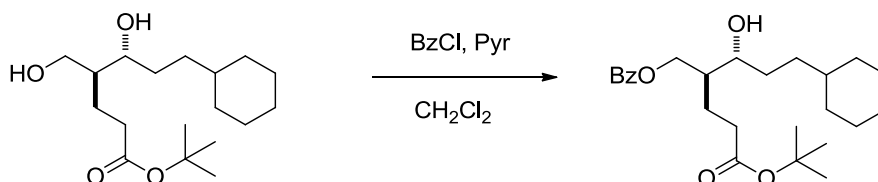

**(S)-2-((R)-3-Cyclohexyl-1-hydroxypropyl)-7,7-dimethyl-5-oxooctyl benzoate**

Purification on a silica gel column (Hexane/AcOEt 90:10) provided 57.2 mg of the product (0.15 mmol, 50% yield).  $^1\text{H}$  NMR (300 MHz,  $\text{CDCl}_3$ )  $\delta$  8.03 (d,  $J = 7.1, 2\text{H}$ ), 7.49 (dt,  $J = 15.1, 7.4, 3\text{H}$ ), 4.45 (dd,  $J = 9.7, 4.7, 2\text{H}$ ), 3.61 (dt,  $J = 8.5, 4.3, 1\text{H}$ ), 2.47 – 2.29 (m, 2H), 1.95 – 1.76 (m, 3H), 1.76 – 1.48 (m, 12H), 1.45 (s, 9H), 1.29 – 1.12 (m, 6H), 0.97 – 0.77 (m, 3H).

The enantiomeric purity of the major diastereoisomer was determined by HPLC analysis (Daicel Chiralpak IC, hexane/ethanol 99/1, flow rate= 1 mL/min, retention times: 34.7 min (min.) and 40.6 min (major)).

**(2S,3S)-2-(4-Boc-aminobutyl)-7-phenylhept-4-yne-1,3-diol (3Ed)**

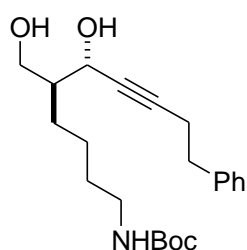

Prepared according to the General Procedure starting from 6-Boc-aminohexanal **1E** (140 mg, 0.65 mmol) and 5-phenylpent-2-ynal **2d** (79 mg, 0.5 mmol). The title compound was obtained as a 13:1 mixture of *anti:syn* isomers. The crude material was purified by flash column chromatography on silica gel (eluting with

hexane/ ethyl acetate 80/20) to give the title compound as a colourless oil. Yield: 71% (134 mg).  $[\alpha]_{\text{D}}^{23} = -1.45$  ( $c=0.94, 95\%$  ee,  $\text{CH}_2\text{Cl}_2$ ).  $^1\text{H}$  NMR (400 MHz,  $\text{CDCl}_3$ )  $\delta = 7.34 - 7.21$  (m, 5H), 4.57 (brs, 1H), 4.45 (m, 1H), 3.98 (m, 1H), 3.68 – 3.62 (m, 1H), 3.22 – 3.08 (m, 2H), 2.95 (br, 1H), 2.86 (t,  $J = 7.6$  Hz, 2H), 2.56 (dt,  $J = 7.6, 2.0$  Hz, 2H), 1.66 – 1.28 (m, 8H), 1.46 (s, 9H).  $^{13}\text{C}$  NMR (100 MHz,  $\text{CDCl}_3$ )  $\delta = 156.4, 140.6, 128.4, 128.3, 126.3, 85.4,$

81.3, 79.3, 65.8, 63.3, 45.9, 39.9, 35.0, 30.3, 28.4, 26.9, 24.0, 20.8. MS (ESI,  $m/z$ ): calcd for  $C_{22}H_{33}NO_4$  (M,  $H^+$ ), 376.2410; found, 376.2414.

The enantiomeric purity of the major diastereoisomer was determined by HPLC analysis (Phenomenex Lux  $3\mu$  Cellulose-4, hexane/isopropanol 90/10, flow rate= 1.5 mL/min, retention times 33.6 min (min.) and 49.23min (mayor.).

### (2S,3S)-2-Allyloct-4-yne-1,3-diol (3Fb)

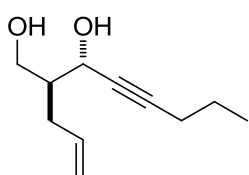

Prepared according to the General Procedure starting from 4-pentenal **1F** (0.6 mL, 0.6 mmol) and hex-2-ynal **2b** (96.1 mg, 0.5 mmol). The title compound was obtained as a 20:1 mixture of *anti:syn* isomers. The crude material was purified by flash column chromatography on silica gel (eluting with hexane/ ethyl acetate 80/20) to give the title compound as a yellow oil. Yield: 50% (44.8 mg).  $^1H$  NMR (300 MHz,  $CDCl_3$ )  $\delta$  5.83 (d,  $J$  = 7.5 Hz, 1H), 5.09 (t,  $J$  = 13.4 Hz, 2H), 4.49 (s, 1H), 3.97 (s, 1H), 3.71 (s, 1H), 2.45 (d,  $J$  = 5.4 Hz, 1H), 2.37 (s, 1H), 2.27 – 2.12 (m, 7H), 1.85 (s, 1H), 1.54 (dd,  $J$  = 14.4, 7.1 Hz, 4H), 1.30 (s, 2H), 1.05 – 0.95 (m, 3H).  $^{13}C$  NMR (75 MHz,  $CDCl_3$ )  $\delta$  136.4, 136.2, 124.6, 117.0, 65.7, 63.9, 46.1, 32.6, 22.2, 20.8, 13.6. MS (ESI,  $m/z$ ): calcd for  $C_{11}H_{18}O_2$  (M,  $H^+$ ), 183.1400; found, 183.1385.

The enantiomeric purity of the major diastereoisomer was determined by chiral HPLC analysis of (4S,5S)-4-(((triphenylsilyl)oxy)methyl)dec-1-en-6-yn-5-ol prepared from **3Fb**.

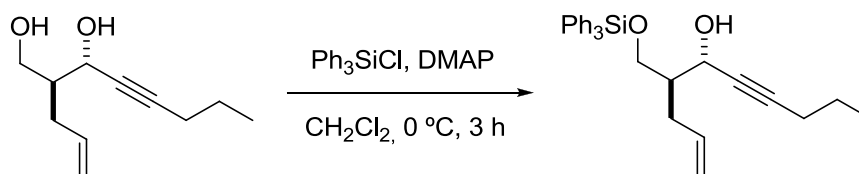

Aduct **3Fb** (47.9 mg; 0.26 mmol) was solved in 1.3 mL of anhydrous  $CH_2Cl_2$  and DMAP (0.31 mmol, 38.1 mg) and  $Ph_3SiCl$  (0.26 mmol, 76.7 mg) was added at 0 °C. The reaction mixture was allowed to stir at 0 °C for 3 h and then quenched by addition of  $H_2O$  (5 mL). The combined organic layers were washed successively with 0.1 M aqueous solution of HCl (10 mL) and sat. aqueous  $NaHCO_3$  solution (10 mL), dried over  $MgSO_4$ , filtered and concentrated. Purification on a silica gel column (hexane/ $AcOEt$ , 90/10) provided 114 mg of the product (0.2 mmol, 80% yield).  $^1H$  NMR (300 MHz,  $CDCl_3$ )  $\delta$  7.66 (dd,  $J$  = 7.8,

1.5 Hz, 6H), 7.46 (dq,  $J = 17.7, 7.0$  Hz, 9H), 5.73 (d,  $J = 7.2$  Hz, 1H), 5.00 (t,  $J = 12.5$  Hz, 2H), 4.61 (s, 1H), 4.23 (d,  $J = 3.9$  Hz, 1H), 3.84 (dd,  $J = 10.1, 5.3$  Hz, 1H), 2.24 – 2.16 (m, 4H), 1.52 (dd,  $J = 14.5, 7.2$  Hz, 2H), 0.98 (t,  $J = 7.3$  Hz, 3H).  $^{13}\text{C}$  NMR (75 MHz,  $\text{CDCl}_3$ )  $\delta$  136.7, 135.6, 133.8, 130.4, 128.1, 116.9, 86.9, 80.2, 65.1, 64.4, 46.1, 32.2, 29.9, 22.3, 20.9.  $[\alpha]_{\text{D}}^{24} = +34.5$  ( $c=0.1$ , 91 % *ee*,  $\text{CH}_2\text{Cl}_2$ ).

The enantiomeric purity of the major diastereoisomer was determined by HPLC analysis (Daicel Chiralpak IB hexane/isopropanol 99/1, flow rate= 1 mL/min, retention times: 7min (min.) and 16.9 min (major.)).

### (3*S*, 4*R*)-4-(Dimethoxymethyl)-1-phenylhept-6-en-1-yn-3-ol (8Ff)

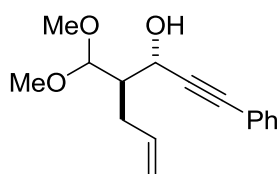

Prepared according to the General Procedure starting from 4-pentenal **1F** (0.15 mL, 1.5 mmol) and phenyl propargyl aldehyde **2f** (0.61 mL, 0.5 mmol). The title compound was obtained as a 8:1 mixture of *anti:syn* isomers. The crude material was purified

by flash column chromatography on silica gel (eluting with hexane/ ethyl acetate 90/10) to give the title compound as a yellow oil. Yield: 84% (109 mg).  $[\alpha]_{\text{D}}^{24} = -8.2$  ( $c=1.05$ , 94 % *ee*,  $\text{CH}_2\text{Cl}_2$ ).  $^1\text{H}$  NMR (300 MHz,  $\text{CDCl}_3$ )  $\delta$  7.51 – 7.31 (m, 5H), 5.94 (ddt,  $J = 17.2, 10.1, 7.2$  Hz, 1H), 5.27 – 5.07 (m, 2H), 4.80 (d,  $J = 5.9$  Hz, 1H), 4.64 (d,  $J = 4.9$  Hz, 1H), 3.50 (s, 3H), 3.49 (s, 3H), 2.55 – 2.37 (m, 2H), 2.20 (ddd,  $J = 10.7, 7.4, 5.7$  Hz, 1H).  $^{13}\text{C}$  NMR (75 MHz,  $\text{CDCl}_3$ )  $\delta$  136.5, 131.6, 128.3, 128.2, 122.4, 117.0, 106.7, 88.9, 85.7, 63.0, 55.9, 54.8, 46.3, 30.3. MS (ESI,  $m/z$ ): calcd for  $\text{C}_{16}\text{H}_{20}\text{O}_3$  (M,  $\text{H}^+$ ), 261.1446; found, 261.1440.

The enantiomeric purity of the major diastereoisomer was determined by HPLC analysis (Daicel Chiralpak AD-H hexane/isopropanol 95/5, flow rate= 1 mL/min, retention times: 19.8 min (min.) and 22.0 min (major.)).

### (3*S*, 4*R*)-4-(dimethoxymethyl)-1-(triisopropylsilyl)hept-6-en-1-yn-3-ol

#### (8Fm)

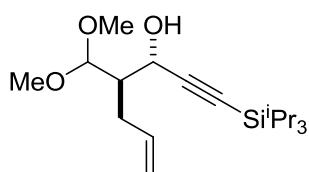

Prepared according to the General Procedure starting from 4-pentenal **1F** (74  $\mu\text{L}$ , 0.75 mmol) and 3-(triisopropylsilyl)propionaldehyde **2m** (105.6 mg, 0.5 mmol).

The title compound was obtained as a 20:1 mixture of *anti:syn* isomers. The crude material was purified by flash column chromatography on silica gel (eluting with hexane/ ethyl acetate 95/5) to give the title compound as a yellow oil. Yellow oil. Yield:55% (53.4mg).  $[\alpha]_D^{25} = +11.9$  ( $c=11$ , 99 % ee,  $\text{CH}_2\text{Cl}_2$ ).  $^1\text{H}$  NMR (500 MHz,  $\text{CDCl}_3$ )  $\delta$  5.90 (d,  $J = 7.6$ , 1H), 5.17 (d,  $J = 17.0$ , 1H), 5.08 (d,  $J = 10.0$ , 1H), 4.64 (d,  $J = 4.8$ , 1H), 4.62 – 4.55 (m, 1H), 3.45 (d,  $J = 1.4$ , 6H), 2.41 (d,  $J = 7.4$ , 2H), 2.07 (s, 1H), 1.11 (s, 18H).  $^{13}\text{C}$  NMR (126 MHz,  $\text{CDCl}_3$ )  $\delta$  136.9, 117.2, 107.6, 106.8, 63.1, 56.2, 54.9, 46.3, 29.7, 18.8, 11.4. MS (ESI,  $m/z$ ): calcd for  $\text{C}_{19}\text{H}_{28}\text{O}_3$  ( $\text{M}, \text{H}^+$ ), 340.57; found ( $\text{M}-2\text{CH}_3\text{O}$ ), 177.1306.

The enantiomeric purity of the major diastereoisomer was determined by chiral HPLC analysis of (((3*S*,4*R*)-4-(dimethoxymethyl)-1-(triisopropylsilyl)hept-6-en-1-yn-3-yl)oxy)triphenylsilane prepared from **8Fm**.

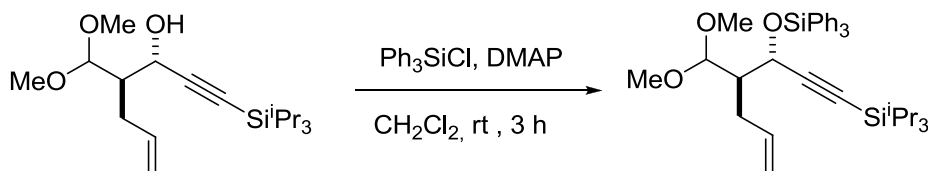

Adduct **8Fm** (121 mg; 0.3 mmol) was solved in 1.5 mL of anhydrous  $\text{CH}_2\text{Cl}_2$  and DMAP (0.45 mmol, 55 mg) and  $\text{Ph}_3\text{ClSi}$  (0.45 mmol, 132.7 mg) was added at rt. The reaction mixture was allowed to stir at rt for 3 h and then quenched by addition of  $\text{H}_2\text{O}$  (5 mL). The combined organic layers were washed successively with 0.1 M aqueous solution of HCl (10 mL) and sat. aqueous  $\text{NaHCO}_3$  solution (10 mL), dried over  $\text{MgSO}_4$ , filtered and concentrated. Purification triturated with ethanol provided 134 mg of the product (0.22 mmol, 75% yield).  $^1\text{H}$  NMR (300 MHz,  $\text{CDCl}_3$ )  $\delta$  7.74 – 7.59 (m, 5H), 7.38 (dt,  $J = 13.9$ , 6.8, 10H), 6.16 – 5.95 (m, 1H), 5.11 – 4.88 (m, 2H), 4.75 (d,  $J = 4.5$ , 1H), 4.35 (d,  $J = 7.5$ , 1H), 3.21 (s, 3H), 3.10 (s, 3H), 2.64 (dd,  $J = 14.0$ , 7.4, 1H), 2.35 (dd,  $J = 13.6$ , 7.0, 1H), 2.10 – 1.98 (m, 1H), 1.15 – 1.08 (m, 3H), 1.09 – 0.99 (m, 18H).  $^{13}\text{C}$  NMR (75 MHz,  $\text{CDCl}_3$ )  $\delta$  138.7, 135.8, 134.3, 130.1, 127.9, 115.0, 106.7, 105.9, 64.8, 53.8, 47.7, 30.7, 18.8, 11.4.

The enantiomeric purity of the major diastereoisomer was determined by HPLC analysis (Daicel Chiralpak AY-H, hexane/isopropanol 98/2, flow rate= 0.5 mL/min, retention times: 4.9 min (major.) and 15 min (min.)).

### (3S,4R)-4-(Dimethoxymethyl)-8,8-dimethoxy-1-phenyloct-1-yn-3-ol (8Gf)

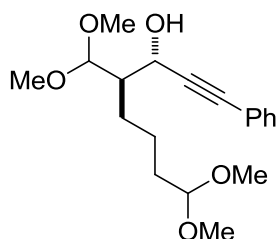

Prepared according to the General Procedure starting from 6,6-dimethoxyhexanal **1G** (0.17 mL, 1.5 mmol) and phenyl propargyl aldehyde **2f** (0.61 mL, 0.5 mmol). The title compound was obtained as a 16:1 mixture of *anti:syn* isomers. The crude material was purified by flash column chromatography on silica gel (eluting with hexane/ ethyl acetate 80/20) to give the title compound as a colorless oil. Yield: 51% (82 mg).  $[\alpha]_D^{22} = -6.18$  ( $c = 0.1$ , 99 % *ee*,  $\text{CH}_2\text{Cl}_2$ ).  $^1\text{H NMR}$  (300 MHz,  $\text{CDCl}_3$ )  $\delta$  7.59 – 7.32 (m, 4H), 4.78 (t,  $J = 5.9$  Hz, 1H), 4.67 (d,  $J = 4.5$  Hz, 1H), 4.41 (t,  $J = 5.4$  Hz, 1H), 3.54 (t,  $J = 3.0$  Hz, 1H), 3.50 (d,  $J = 1.4$  Hz, 1H), 3.40 – 3.30 (m, 6H), 2.07 (dd,  $J = 7.4, 3.0$  Hz, 1H), 1.80 – 1.46 (m, 6H).  $^{13}\text{C NMR}$  (75 MHz,  $\text{CDCl}_3$ )  $\delta$  131.6, 128.3, 122.7, 107.2, 104.4, 89.3, 85.3, 63.0, 56.3, 55.2, 52.7, 46.2, 32.7, 24.9, 22.5.

The enantiomeric purity of the major diastereoisomer was determined by HPLC analysis (Daicel Chiralpak IC, hexane/isopropanol 90/10, flow rate= 1 mL/min, retention times: 23.1 min (min.) and 25.7 min (major)).

### (E)-2-(4-(3,5-Dimethylphenoxy)-2-methylbut-2-en-1-yl)-7-methyloct-4-yne-1,3-diol (3Hc)

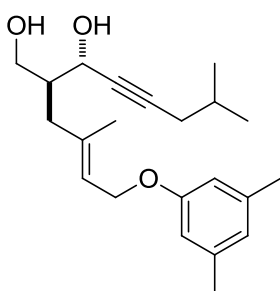

Prepared according to the General Procedure starting from (*E*)-6-(3,5-dimethylphenoxy)-4-methylhex-4-enal **1H** (139.4 mg, 0.6 mmol) and 5-methylhex-2-ynal **2c** (55 mg, 0.5 mmol). The title compound was obtained as a 20:1 mixture of *anti:syn* isomers. The crude material was purified by flash column chromatography on silica gel (eluting with hexane/ ethyl acetate 80/20) to give the title compound as a yellow oil. Yield: 61% (103.3 mg)  $[\alpha]_D^{24} = 6.5$  ( $c = 1$ , 99% *ee*,  $\text{CH}_2\text{Cl}_2$ )  $^1\text{H NMR}$  (300 MHz,  $\text{CDCl}_3$ )  $\delta$  6.60 (s, 1H), 6.53 (s, 2H), 5.58 (s, 1H), 4.51 (d,  $J = 6.4$  Hz, 3H), 3.93 (s, 1H), 3.67 (d,  $J = 5.6$  Hz, 1H), 2.42 (s, 2H), 2.28 (s, 5H), 2.13 (dd,  $J = 6.5, 2.0$  Hz, 3H), 1.97 (s, 1H), 1.88 – 1.79 (m, 1H), 1.76 (s, 2H), 0.98 (d,  $J = 6.6$  Hz, 5H).  $^{13}\text{C NMR}$  (75 MHz,  $\text{CDCl}_3$ )  $\delta$  158.9, 139.3, 138.8, 136.2, 122.7, 112.6, 86.0, 81.1, 65.7, 64.6,



63.7, 44.2, 38.1, 28.1, 28.0, 22.1, 21., 16.6. MS (ESI,  $m/z$ ): calcd for  $C_{22}H_{32}O_3$  ( $M, H^+$ ), 344.4877; found ( $M-H_2O$ ), 327.2324

The enantiomeric purity of the major diastereoisomer was determined by HPLC analysis (Daicel Chiralpak AD-H, hexane/isopropanol 97/3, flow rate= 1 mL/min, retention times: 31.1 min (min.) and 36.6 min (major)).

## F) Reduction of propargylic aldol adducts

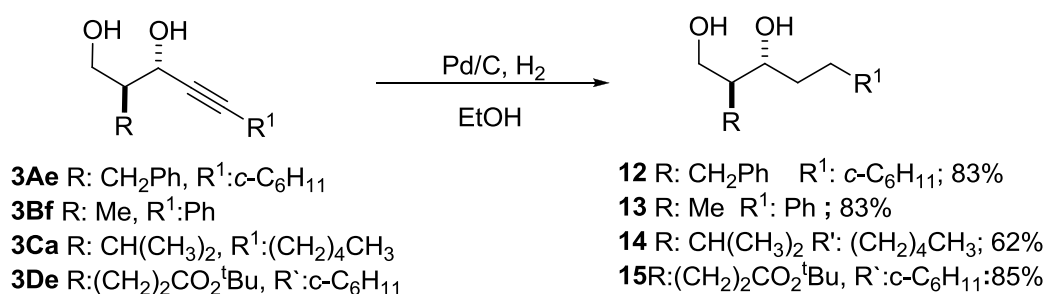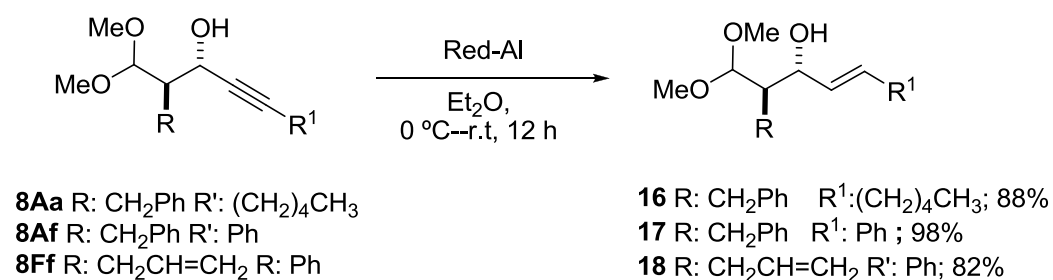

### F.1) Hydrogenation of aldol adducts **3Ae**, **3Bf**, **3Ca** and **4De**

To a solution of **3Ae**, **3Bf**, **3Ca** or **3De** in EtOH (2 mL) was added 20 wt% Pd/C (60 mg). The reaction mixture was stirred at room temperature under  $H_2$  atmosphere overnight, then filtered through Celite® and concentrated under vacuum.

**(2*S*,3*R*)-2-Benzyl-5-cyclohexylpentane-1,3-diol (12)**

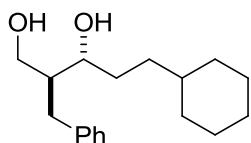

Prepared according to the General Procedure starting from **3Ae**.

The title compound was obtained as white solid. Yield: 83% (0.41 mmol, 114 mg).  $[\alpha]_D^{20} = +13.1$  ( $c=1$ , 93 % *ee*,  $\text{CH}_2\text{Cl}_2$ ).  $^1\text{H}$  NMR (300 MHz,  $\text{CDCl}_3$ )  $\delta = 7.68 - 7.39$  (m, 5H), 4.19 (dd,  $J=11.0$ , 2.9 Hz, 1H), 4.04-3.91 (m, 1H), 3.86 (dd,  $J=11.0$ , 4.6 Hz, 1H), 3.21 - 2.85 (m, 4H), 2.07 - 1.00 (m, 14H).  $^{13}\text{C}$  NMR (75 MHz,  $\text{CDCl}_3$ )  $\delta = 140.4$ , 129.1, 129.0, 128.4, 126.0, 75.3, 62.8, 45.9, 37.7, 35.2, 33.5, 33.4, 33.3, 33.0, 30.3, 26.6, 26.3.

**(2*S*,3*R*)-2-Methyl-5-phenylpentane-1,3-diol (13)**

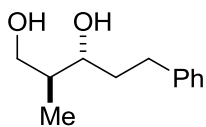

Prepared according to the General Procedure starting from **3Bf**. The

title compound was obtained as a colorless oil. Yield: 83% (0.41 mmol, 80.5 mg).  $[\alpha]_D^{20} = +4.15$  ( $c=0.25$ ,  $\text{CH}_2\text{Cl}_2$ )  $^1\text{H}$  NMR (300 MHz,  $\text{CDCl}_3$ )  $\delta = 7.51 - 7.05$  (m, 4H), 3.84 (dd,  $J=10.8$ , 3.8 Hz, 1H), 3.67 (dd,  $J=10.8$ , 7.1 Hz, 1H), 3.00 - 2.82 (m, 1H), 2.82 - 2.70 (m, 1H), 2.02 - 1.71 (m, 3H), 0.94 (d,  $J=7.0$  Hz, 3H).  $^{13}\text{C}$  NMR (75 MHz,  $\text{CDCl}_3$ )  $\delta = 142.5$ , 128.8, 126.3, 77.0, 68.0, 40.4, 37.5, 32.1, 14.2.

**(2*S*,3*R*)-2-isopropyldecane-1,3-diol (14)**

For the detailed experimental procedure and characterization data of **14**, see page S25.

**(4*S*,5*R*)-tert-butyl 7-cyclohexyl-5-hydroxy-4-(hydroxymethyl)heptanoate (15)**

For the detailed experimental procedure and characterization data of **15**, see page S27.

## F.2) Partial reduction of **8Aa**, **8Af**, **8Ff**.

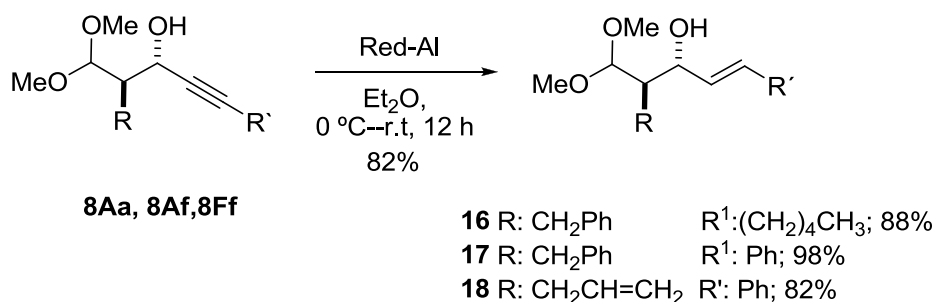

A solution of sodium bis(2-methoxyethoxy)aluminium hydride (Red-Al) (3.60 mL, 1.2 mmol, 65% in toluene) was added dropwise to a solution of **8Aa**, **8Af** or **8Ff** (0.8 mmol) in diethyl ether (2 mL) at 0 °C. The reaction mixture was allowed to stir for 12 h at room temperature. An aqueous solution of saturated potassium sodium tartrate (4 mL) was slowly added at 0 °C to quench the reaction and then the whole mixture was extracted twice with diethyl ether (2 x 2mL). The combined organic extracts were washed with brine (5 mL) and dried over MgSO<sub>4</sub> and evaporated under reduced pressure to give the desired compound, which was not further purified.

### (2*R*,3*R*,*E*)-2-Benzyl-1,1-dimethoxydec-4-en-3-ol (**16**)

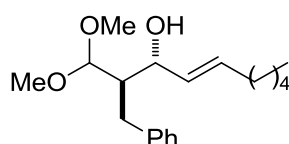

Prepared according to the General Procedure starting from **8Aa** (1 mmol). The title compound was obtained as yellow oil.

Yield: 88% (0.88 mmol, 270.7 mg). <sup>1</sup>H NMR (300 MHz, CDCl<sub>3</sub>) δ

7.32 – 7.15 (m, 6H), 5.74 – 5.63 (m, 1H), 5.44 (dd, *J* = 15.3, 6.8 Hz, 1H), 4.28 (d, *J* = 3.4 Hz, 1H), 4.16 (dd, *J* = 11.6, 6.1 Hz, 1H), 3.46 (d, *J* = 4.7 Hz, 1H), 3.44 (s, 3H), 3.35 (s, 3H), 2.71 (qd, *J* = 13.9, 7.2 Hz, 2H), 2.12 – 1.98 (m, 3H), 1.41 – 1.24 (m, 7H), 0.87 (t, *J* = 6.8 Hz, 3H). <sup>13</sup>C NMR (75 MHz, CDCl<sub>3</sub>) δ 140.8, 133.0, 131.6, 129.4, 128.5, 126.1, 107.6, 72.3, 56.6, 55.6, 48.1, 32.4, 32.3, 31.6, 29.0, 22.7, 14.2.

### (3*R*,4*R*,*E*)-4-Benzyl-5,5-dimethoxy-1-phenylpent-1-en-3-ol (**17**)

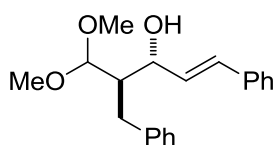

Prepared according to the General Procedure starting from **8Af** (1.5 mmol). The title compound was obtained as yellow oil. Yield:

98 % (1.4 mmol, 464 mg). <sup>1</sup>H NMR (300 MHz, CDCl<sub>3</sub>) δ 7.38 – 7.16

(m, 12H), 6.63 (d, *J* = 15.9 Hz, 1H), 6.20 (dd, *J* = 15.9, 6.2 Hz, 1H), 4.37 (d, *J* = 6.3 Hz, 1H),

4.34 (d,  $J = 3.4$  Hz, 1H), 3.59 (d,  $J = 5.3$  Hz, 1H), 3.46 (s, 3H), 3.39 (s, 3H), 2.83 – 2.77 (m, 2H), 2.20 (s, 1H).  $^{13}\text{C}$  NMR (75 MHz,  $\text{CDCl}_3$ )  $\delta$  131.7, 130.7, 129.4, 128.71, 127.6, 126.6, 126.2, 107.5, 72.0, 56.8, 55.8, 48.5, 32.1.

**(3R,4R,E)-4-(Dimethoxymethyl)-1-phenylhepta-1,6-dien-3-ol (18)**

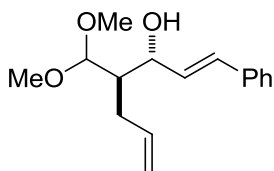

Prepared according to the General Procedure starting from **8Ff** (0.8 mmol). The title compound was obtained as yellow oil. Yield: 98 % (1.4 mmol, 464 mg). Yield: 82% (172mg)  $^1\text{H}$  NMR (300 MHz,  $\text{CDCl}_3$ )  $\delta$  = 7.51 – 7.19 (m, 6H), 6.64 (s, 1H), 6.30 (d,  $J=6.7$  Hz, 1H), 5.95 – 5.78 (m, 1H), 5.20 – 5.05 (m, 3H), 4.49 (d,  $J=4.5$  Hz, 1H), 3.50 (s, 2H), 3.46 (s, 3H), 2.33 – 2.22 (m, 2H), 2.07 – 1.97 (m, 1H).  $^{13}\text{C}$  NMR (75 MHz,  $\text{CDCl}_3$ )  $\delta$  = 136.5, 131.1, 130.9, 128.5, 127.5, 126.5, 116.8, 107.3, 72.6, 56.2, 54.8, 54.8, 46.2, 30.9.

### G) Elaboration of Propargylic Alcohols

The present direct cross aldol approach also enables rapid access to a variety of optically active structural motifs with at least two contiguous stereogenic centers, thereby complementing previous catalyst-controlled asymmetric entries to propargylic alcohols, such as the reduction of ynones, the alkylation of carbonyls or the 1,2-addition of organometallic reagents,<sup>20</sup> methods that generally provide a sole new stereocenter.

<sup>20</sup> a) Cozzi, P. G.; Hilgraf, R.; Zimmermann, N. *Eur. J. Org. Chem* **2004**, 4095-4105. b) Pu, L. *Tetrahedron* **2003**, 59, 9873-9886. c) Lu, G; Li, Y.M, X. S. Li, A.S. C. Chan *Coord. Chem. Rev.* **2005**, 249, 1736-1744.

### G.1) Diiodination of adduct **3Af**

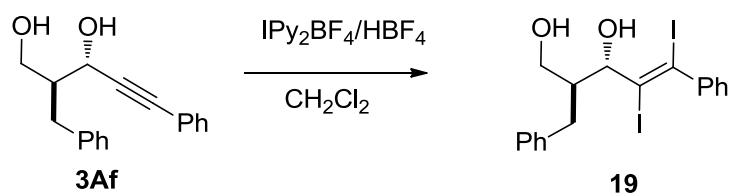

To a solution of **3Af** (1 mmol, 266 mg) in  $\text{CH}_2\text{Cl}_2$  (3 mL) were added  $\text{HBF}_4$  (2 mmol, 0.56 ml, 48 wt % solution in  $\text{H}_2\text{O}$ ) and commercially available  $\text{IPy}_2\text{BF}_4$  (1 mmol, 372 mg) at room temperature. After stirring for 3 h, the solution was quenched with water (6 mL), extracted with  $\text{CH}_2\text{Cl}_2$  (2 x 3 mL), washed with sodium thiosulfate (5 % aqueous solution, 5 mL), dried over  $\text{MgSO}_4$ , and evaporated under reduced pressure. The crude material revealed the presence of two compounds. The first one was the starting material (43%) and the second one was identified as compound **19** by  $^1\text{H-NMR}$  spectroscopy and X-Ray analysis. The substances were separated by flash column chromatography on silica gel (eluting with hexane/Ethyl acetate, 80:20) and compound **19** was finally crystallized from hexane/ $\text{CH}_2\text{Cl}_2$ . Yield: 53%.  $^1\text{H NMR}$  (300 MHz,  $\text{CDCl}_3$ )  $\delta$  7.52 – 7.04 (m, 9H), 4.49 (d,  $J = 8.4$  Hz, 1H), 3.98 (dd,  $J = 11.0, 2.8$  Hz, 1H), 3.79 (dd,  $J = 11.0, 5.9$  Hz, 1H), 2.84 (d,  $J = 4.0$  Hz, 1H), 2.64 (dd,  $J = 13.6, 11.1$  Hz, 1H), 2.44 (m, 1H).  $^{13}\text{C NMR}$  (75 MHz,  $\text{CDCl}_3$ )  $\delta$  147.6, 139.3, 129.2, 128.5, 128.0, 126.4, 112.5, 96.8, 83.6, 62.3, 48.2, 33.7. M.p.: 170-179°C

## G.2) Intramolecular hydroamination of aldol adduct **8Cf**.

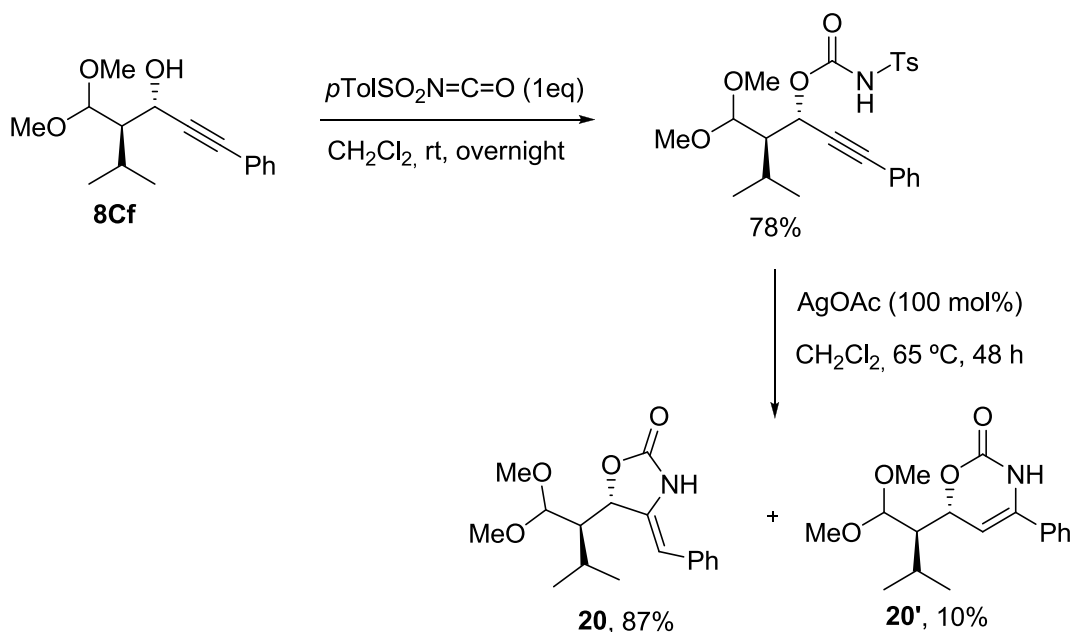

### General procedure for the synthesis of adducts **20a** and **20b**<sup>21</sup>

#### Step 1:

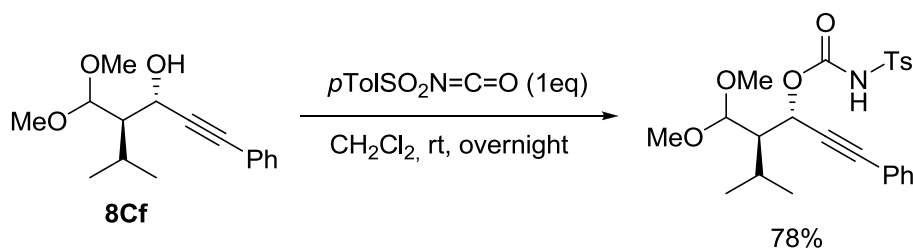

To a solution of **8Cf** (1.7 mmol) in  $\text{CH}_2\text{Cl}_2$  (1.9 mL) toluenesulfonyl isocyanate (1.7 mmol) was added. After stirring the resulting solution for 20 h at room temperature the solvent was removed. The crude material was purified by flash column chromatography on silica gel (eluting with hexane/ ethyl acetate 70:30) to give compound N-tosyl carbamate product as a white solid. Yield: 78 %  $^1\text{H-NMR}$  (300 MHz,  $\text{CDCl}_3$ )  $\delta$  7.95 (d,  $J = 8.4$  Hz, 2H), 7.53 (s, 1H), 7.41 – 7.18 (m, 8H), 5.78 (d,  $J = 5.2$  Hz, 1H), 4.46 (d,  $J = 6.6$  Hz, 1H), 3.34 (d,  $J = 2.7$  Hz, 7H), 2.39 (s, 3H), 2.22 – 2.09 (m, 1H), 2.10 – 2.02 (m, 1H), 1.05 (dd,  $J = 10.1, 7.0$  Hz, 8H).  $^{13}\text{C NMR}$  (75 MHz,  $\text{CDCl}_3$ )  $\delta$  149.3, 145.0, 131.7, 129.5, 128.7, 128.4, 128.2, 104.1, 84.6, 67.2, 54.1, 54.0, 49.0, 26.0, 21.7, 21.5, 19.8.

<sup>21</sup> Adapted from: a) Tamaru, Y.; Kimura, M.; Tanaka, S.; Kura, S. Yoshida, Z. *Bull. Chem. Soc. Jpn.* 1994, 67, 2838-2849  
b) Ohe, K.; Ishihara, T.; Chatani, Y. K.; Murai, S. *J. Org. Chem.* 1991, 56, 2267-2268.

### Step 2<sup>22</sup>:

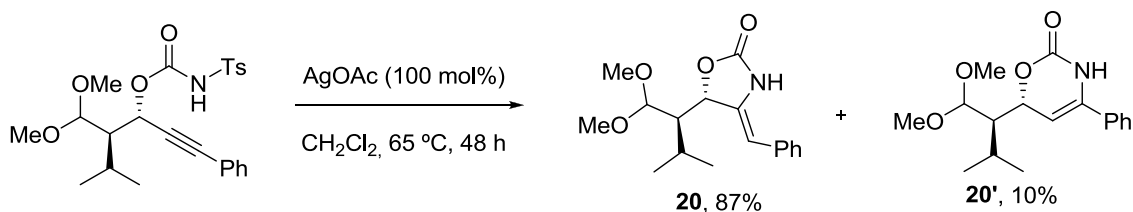

To a stirred solution of (3*S*,4*R*)-4-(dimethoxymethyl)-5-methyl-1-phenylhex-1-yn-3-yl tosylcarbamate (0.46 mmol, 212 mg), in CH<sub>2</sub>Cl<sub>2</sub> (0.5 ml) was added AgOAc (100 mol%, 76.8 mg). The reaction mixture was stirred for 48h at 65 °C and then filtered through a pad of celite with a washing with 10 ml of CH<sub>2</sub>Cl<sub>2</sub>. After removal of filtrate solvent in vacuum the residue was purified by silica gel flash column chromatography on silica gel (eluting with hexane/ethyl acetate 95:5) to afford pure compounds **20'** as white oil (10 %) and **20** as white oil (87 %).

#### (*R*)-6-((*R*)-1,1-Dimethoxy-3-methylbutan-2-yl)-4-phenyl-3,6-dihydro-2H-1,3-oxazin-2-one (**20'**)

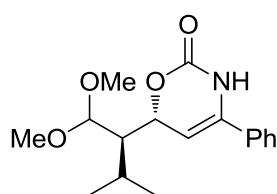

Colorless oil. Yield: 10 % [ $\alpha$ ]<sub>D</sub><sup>25</sup> = +21.7(*c*=0.98, CH<sub>2</sub>Cl<sub>2</sub>). <sup>1</sup>H NMR (300 MHz, CDCl<sub>3</sub>)  $\delta$  7.95 (dd, *J* = 8.4, 1.4, 2H), 7.58 – 7.42 (m, 3H), 6.97 (d, *J* = 11.9, 1H), 6.29 – 6.19 (m, 1H), 4.41 (d, *J* = 5.6, 1H), 3.77 – 3.65 (m, 1H), 3.34 (d, *J* = 9.0, 6H), 1.97 (dd, *J* = 13.2, 6.7, 1H), 0.94 (dd, *J* = 9.7, 6.9, 7H). <sup>13</sup>C NMR (75 MHz, CDCl<sub>3</sub>)  $\delta$  192.0, 145.8 138.7, 132.6, 128.4, 128.3, 126.7, 105.9, 54.1, 53.9, 46.0, 28.9, 21.0, 19.0. MS (ESI, *m/z*): calcd for C<sub>17</sub>H<sub>23</sub>NO<sub>4</sub> (*M*, H<sup>+</sup>), 305, 3688; found, (*M*- Ph): 231.1385.

#### (*S,Z*)-4-Benzylidene-5-((*R*)-1,1-dimethoxy-3-methylbutan-2-yl)oxazolidin-2-one (**20**)

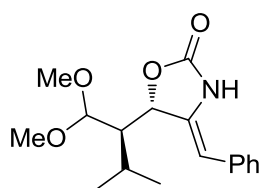

Colorless oil. Yield: 87 % [ $\alpha$ ]<sub>D</sub><sup>25</sup> = +38.8(*c*=1.08, CH<sub>2</sub>Cl<sub>2</sub>). <sup>1</sup>H NMR (300 MHz, CDCl<sub>3</sub>)  $\delta$  7.93 (dd, *J* = 8.3, 1.4 Hz, 2H), 7.51 (dq, *J* = 8.5, 7.1 Hz, 3H), 6.96 – 6.80 (m, 2H), 4.48 (d, *J* = 7.0

<sup>22</sup> Adapted from: Vasudev, R.; Looper, R. E. *J. Am. Chem. Soc.* **2011**, *133*, 20172-20174.

Hz, 1H), 3.37 (d,  $J = 8.5$  Hz, 6H), 2.48 (dd,  $J = 12.6, 8.1$  Hz, 1H), 2.13 – 2.00 (m, 1H), 0.93 (dd,  $J = 17.6, 6.9$  Hz, 8H).  $^{13}\text{C}$  NMR (75 MHz,  $\text{CDCl}_3$ )  $\delta$  190.5, 146.1, 138.0, 132.5, 128.7, 128.6, 128.4, 104.8, 77.4, 77.0, 76.5, 54.0, 53.5, 52.0, 28.1, 21.5, 18.1. MS (ESI,  $m/z$ ): calcd for  $\text{C}_{17}\text{H}_{23}\text{NO}_4$  ( $\text{M}, \text{H}^+$ ), 305,3688; found, ( $\text{M} - \text{Ph}$ ): 231.1385.

### G.3) Intramolecular hydroalkoxylation of adduct **3Af**<sup>23</sup>

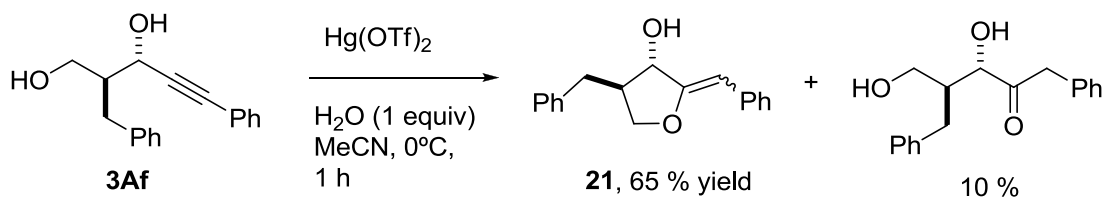

To a stirred mixture of **3Af** (266 mg, 1 mmol) and  $\text{H}_2\text{O}$  (54mg, 3 mmol) in  $\text{MeCN}$  (3.3 mL), was added a solution of  $\text{Hg}(\text{OTf})_2$  (0.1M  $\text{MeCN}$  soln, 0.1 mL, 0.01 mmol) at  $0^\circ\text{C}$ , and the mixture was stirred for 1 hour at the same temperatura. After addition of  $\text{Et}_3\text{N}$  (15  $\mu\text{L}$ ) and then brine (3 mL), the organic materials were extrated with  $\text{Et}_2\text{O}$ . Dried and concentrated extract was subjected to a column chromatography on  $\text{SiO}_2$  using hexane and  $\text{EtOAc}$  (2:1) as an eluent to give the compound **21** (173.1 mg, 65% yield) as a colorless oil.  $^1\text{H}$  NMR (300 MHz,  $\text{CDCl}_3$ )  $\delta$  7.65 – 7.59 (m, 1H), 7.41 – 7.29 (m, 10H), 5.50 (s, 1H), 5.49 – 5.47 (m, 0H), 4.59 (s, 1H), 4.36 (dd,  $J = 8.4, 6.9$  Hz, 1H), 4.24 (t,  $J = 8.7$  Hz, 1H), 3.07 (dd,  $J = 13.5, 7.4$  Hz, 1H), 2.79 – 2.67 (m, 2H), 2.62 (dd,  $J = 8.2, 6.1$  Hz, 1H).  $^{13}\text{C}$  NMR (75 MHz,  $\text{CDCl}_3$ )  $\delta$  151.5, 140.6, 136.2, 129.1, 128.8, 128.3, 127.8, 126.1, 124.9, 97.0, 74.7, 64.1, 62.6, 59.7, 45.1, 35.1. MS (ESI,  $m/z$ ): calcd for  $\text{C}_{18}\text{H}_{19}\text{O}_2$  ( $\text{M}, \text{H}^+$ ), 267.1385; found: 267.1382.

A small amount (28.4 mg, 10% yield) of hydrated side product was also obtained.

<sup>23</sup> Nishizawa, M.; Takemoto, T.; Sasaki, I.; Nakano, M; Ho, E.; Namba, K.; Yamamoto, H.; Imagawa, H. *Synlett* **2009**, 1175-1179.



#### G.4) Intramolecular cycloaddition reaction<sup>24</sup>

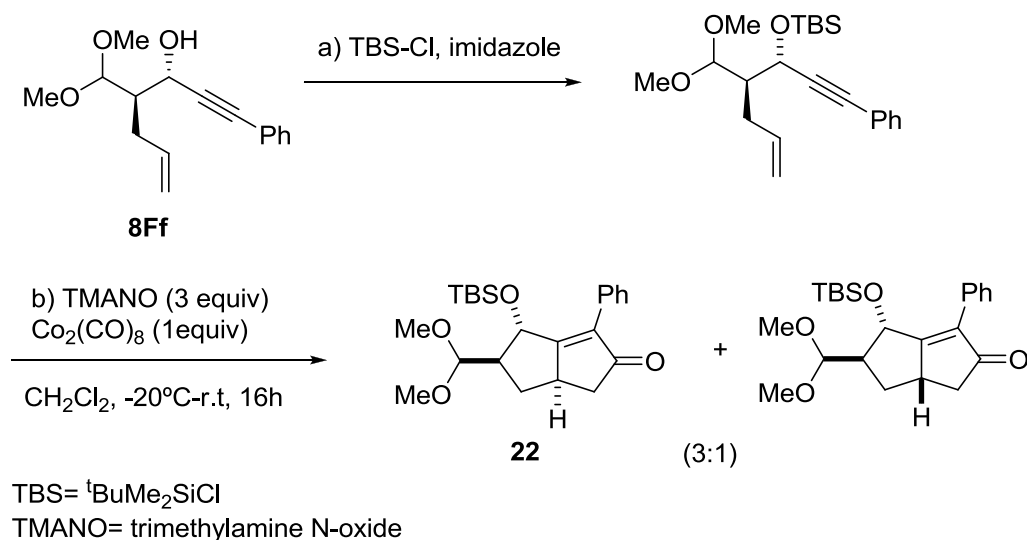

After silylation of **8Ff** with TBS-Cl and DMAP system under standard conditions, a solution of TBS ether (134mg, 0.36 mmol, 1 equiv) in DCM (1 mL) at room temperature was added Co<sub>2</sub>(CO)<sub>8</sub> (1 equiv) and was stirred for 30 min. Then the TMANO (3 equiv) was added at -10°C and the mixture was allowed to warm to room temperature and stirred at room temperature until the starting material disappeared (4-16 hours) at which time usually purple precipitate had formed. The mixture was passed through a small plug of silica gel and the filtrate was concentrated in vacuo and purified by silica gel chromatography to give the exo product (53%), and endo product (14%).<sup>1</sup>H NMR (300 MHz, CDCl<sub>3</sub>) δ 7.60 – 7.34 (m, 6H), 4.86 (s, 1H), 4.15 (t, *J* = 7.6 Hz, 1H), 3.37 (s, 3H), 3.35 (s, 3H), 2.96 – 2.80 (m, 1H), 2.76 – 2.62 (m, 1H), 2.47 – 2.36 (m, 1H), 2.35 – 2.16 (m, 2H), 1.21 – 1.03 (m, 1H), 0.91 (s, 9H), 0.09 (s, 3H), 0.03 (s, 3H).<sup>13</sup>C NMR (75 MHz, CDCl<sub>3</sub>) δ 208.9, 179.9, 134.6, 131.3, 128.7, 128.4, 106.2, 70.3, 54.9, 53.6, 42.6, 40.3, 30.9, 25.7, -4.0, -5.0. MS (ESI, *m/z*): calcd for C<sub>23</sub>H<sub>35</sub>O<sub>4</sub>Si (M, H<sup>+</sup>), 403.2289; found: 403.2305.

<sup>24</sup> a) Turlington, M.; Yue, Y.; Yu, X.-Q.; Pu, L. *J. Org. Chem.* **2010**, *75*, 6941-6952. b) Mukai, C.; Sonobe, H.; Kim, J. S.; Hanaoka, M. *J. Org. Chem.* **2000**, *65*, 6654-6659.

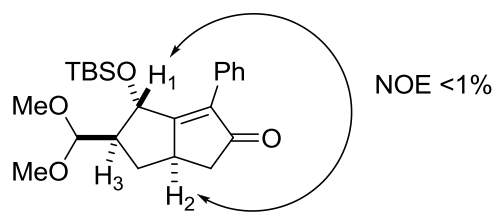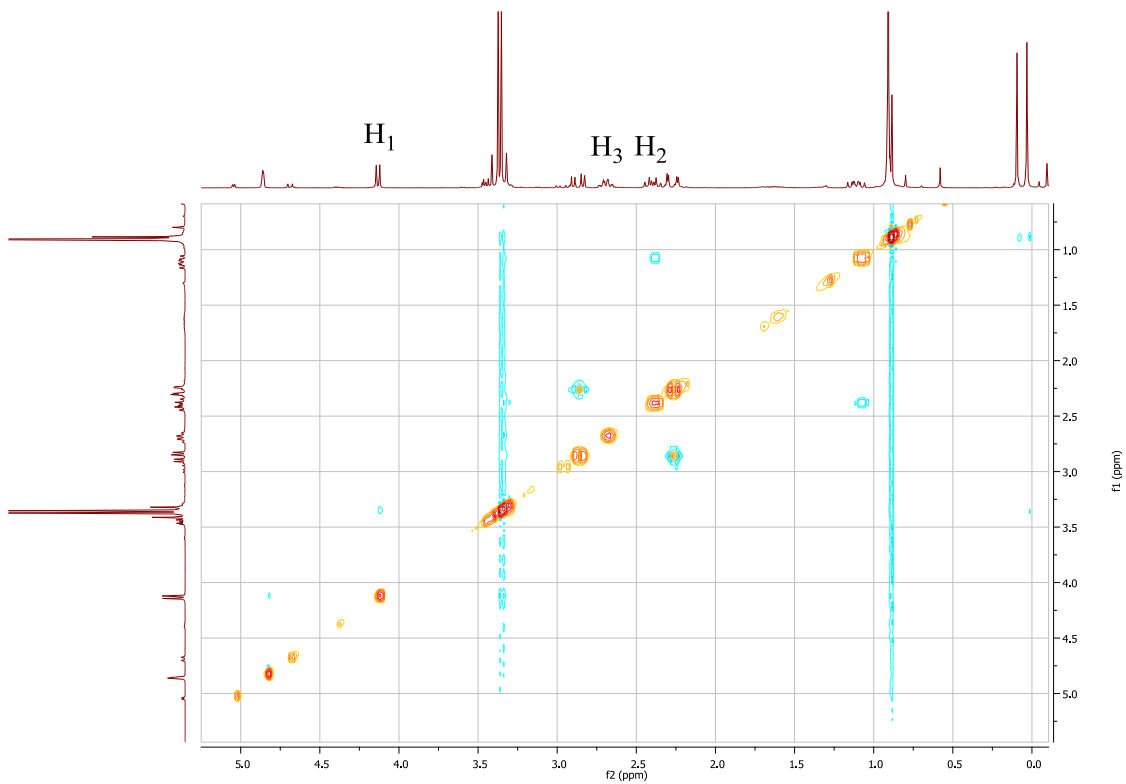

## H) Cross-aldol reaction of aliphatic aldehydes with aromatic aldehydes

Table S2

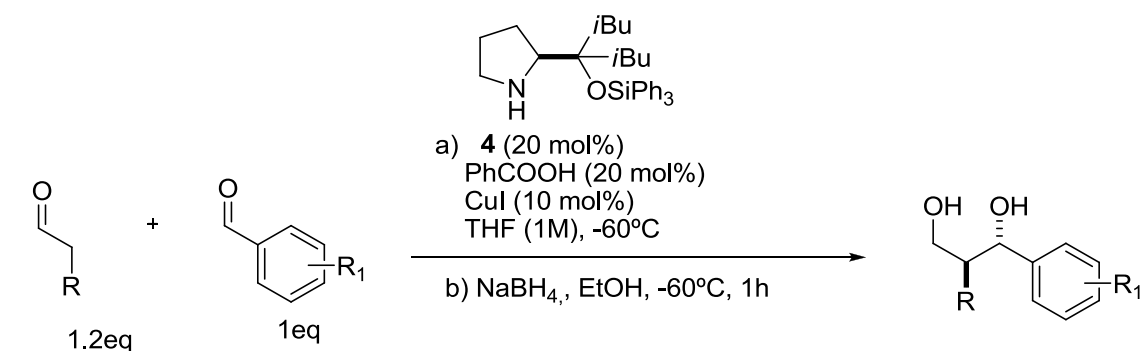

| R                                  | R <sub>1</sub>    | Time(h) | Yield(%) <sup>a</sup> | <i>anti:syn</i> <sup>b,c</sup> | ee (%) <sup>d</sup> |
|------------------------------------|-------------------|---------|-----------------------|--------------------------------|---------------------|
| CH <sub>2</sub> Ph                 | 4-CN              | 24      | 60                    | 5:1 (4:1) <sup>d</sup>         | 97                  |
| CH <sub>2</sub> Ph                 | 4-NO <sub>2</sub> | 24      | 45                    | 4:1 (4:1) <sup>d</sup>         | 95 <sup>e</sup>     |
| CH <sub>2</sub> CH=CH <sub>2</sub> | 4-CN              | 48      | 50                    | 3:1 (3:1) <sup>d</sup>         | 97                  |

<sup>a</sup>Reactions conducted at 0.5mmol scale, using 1.2 equiv. of aldehyde donor, THF (0.5mL). <sup>b</sup> Determined by <sup>1</sup>H-RMN and corroborated by HPLC. <sup>c</sup>Data in parenthesis refer to reactions carried out with benzoic acid as the sole cocatalyst. <sup>d</sup>Determined by chiral HPLC. <sup>e</sup>Reaction carried out at -40 °C because of the low solubility of p-nitrobenzaldehyde in THF at -60 °C. Some extent of homoaldolization was observed.

### 4-((1*S*,2*S*)-2-Benzyl-1,3-dihydroxypropyl)benzonitrile (**23**)

Prepared according to the General Procedure starting from hydrocinnamaldehyde **1A**

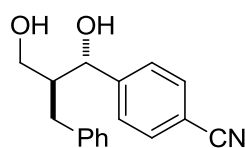

(79 μL, 0.6 mmol) and 4-formylbenzonitrile (65.6 mg, 0.5 mmol). The title compound was obtained as a 5:1 mixture of

*anti:syn* isomers. The crude material was purified by flash column chromatography on silica gel (eluting with hexane/

ethyl acetate 50/50) to give the title compound as a yellow oil. Yield: 60 % (80 mg). <sup>1</sup>H

NMR (300 MHz, CDCl<sub>3</sub>) δ 7.66 (t, *J* = 8.5 Hz, 2H), 7.51 (dd, *J* = 19.8, 8.4 Hz, 3H), 7.24 (ddd, *J* = 28.6, 14.4 Hz, 7.2, 7H), 7.03 (d, *J* = 6.7 Hz, 1H), 5.21 (s, 1H), 4.86 (s, 1H), 3.71 (d, *J* = 11.7 Hz, 2H), 3.61 (s, 1H), 3.50 (d, *J* = 4.6 Hz, 1H), 3.35 (s, 1H), 2.87 (d, *J* = 6.9 Hz, 1H), 2.85 – 2.78 (m, 1H), 2.78 – 2.71 (m, 1H), 2.70 – 2.63 (m, 1H), 2.54 (dd, *J* = 13.8, 4.3 Hz, 1H).

### (1S,2S)-2-benzyl-1-(4-nitrophenyl)propane-1,3-diol (24)

Prepared according to the General Procedure starting from hydrocinnamaldehyde **1A**

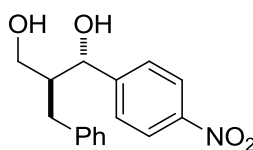

(79  $\mu$ L, 0.6 mmol) and 4-nitrobenzaldehyde (75.6 mg, 0.5 mmol). The title compound was obtained as a 4:1 mixture of *anti:syn* isomers. The crude material was purified by flash

column chromatography on silica gel (eluting with hexane/ ethyl acetate 50/50) to give the title compound as a yellow oil. Yield: 45 % (64.6 mg).  $^1\text{H}$  NMR (500 MHz,  $\text{CDCl}_3$ )  $\delta$  8.29 – 8.21 (m, 5H), 7.60 (d,  $J$  = 8.7 Hz, 2H), 7.54 (d,  $J$  = 8.6 Hz, 5H), 7.33 – 7.14 (m, 7H), 7.03 (d,  $J$  = 7.5 Hz, 2H), 5.27 (s, 1H), 4.91 (s, 2H), 4.84 (s, 2H), 3.77 (s, 1H), 3.70 (s, 3H), 3.62 (d,  $J$  = 4.6 Hz, 3H), 2.85 (d,  $J$  = 6.8 Hz, 2H), 2.82 – 2.75 (m, 2H), 2.67 (s, 2H), 2.55 (s, 1H).

### 4-((1S,2S)-1-Hydroxy-2-(hydroxymethyl)pent-4-en-1-yl)benzotrile (25)

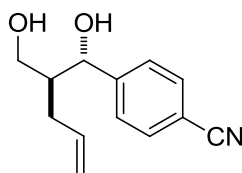

Prepared according to the General Procedure starting from 4-pentenal **1F** (60  $\mu$ L, 0.6 mmol) and 4-formylbenzotrile (65.6 mg, 0.5 mmol). The title compound was obtained as a 3:1 mixture of *anti:syn* isomers. The crude material was purified by

flash column chromatography on silica gel (eluting with hexane/ ethyl acetate 70/30) to give the title compound as a yellow oil. Yield: 50 % (55 mg).  $^1\text{H}$  NMR (300 MHz,  $\text{CDCl}_3$ )  $\delta$  7.67 (d,  $J$  = 2.3 Hz, 2H), 7.49 (d,  $J$  = 8.1 Hz, 2H), 5.74 (t,  $J$  = 15.1 Hz, 1H), 5.17 – 5.00 (m, 2H), 4.86 (t,  $J$  = 5.3 Hz, 1H), 3.87 – 3.68 (m, 2H), 3.46 (d,  $J$  = 4.8 Hz, 0H), 3.30 (s, 1H), 2.17 (dd,  $J$  = 14.3, 8.0 Hz, 3H), 1.96 (d,  $J$  = 24.6 Hz, 2H).

## I) Results from other amine catalysts

**Table S3:** Aldol reaction of **1A** with **2a** using  $\alpha,\alpha$ -diarylprolinol ethers as catalysts.

| Amine | Metal salt                             | Time(h) | Conversion (%) <sup>b,c</sup> | <i>anti:syn</i> <sup>d</sup> | <i>ee</i> (%) <sup>e</sup> |
|-------|----------------------------------------|---------|-------------------------------|------------------------------|----------------------------|
|       | --                                     | 20      | 45                            | 3:1                          | ND                         |
|       | Cu(OAc) <sub>2</sub> ·H <sub>2</sub> O | 20      | 74(54)                        | 2:1                          | 97                         |
|       | --                                     | 20      | 60                            | 1.5:1                        | 97                         |
|       | CuI                                    | 20      | 73(48)                        | 1.5:1                        | 99                         |
|       | --                                     | 20      | 30                            | n.d                          | ND                         |
|       | CuI                                    | 20      | 33                            | 2.5:1                        | 98                         |

7: Ar: 3,5 (CF<sub>3</sub>)<sub>2</sub>C<sub>6</sub>H<sub>3</sub>

<sup>a</sup> Reactions conducted on a 0.5 mmol scale in 0.5 mL of THF (mol ratio of **1/2**/amine, 1.5:1:0.2); <sup>b</sup> Determined by <sup>1</sup>H NMR. <sup>c</sup> Conversions were essentially the same after 48 h of reaction. Numbers in parentheses refer to isolated yields by column chromatography. <sup>d</sup> Determined by <sup>1</sup>H NMR of an aliquot in the aldehyde product before reduction, and confirmed in the crude alcohol products. <sup>e</sup> *ee* of major diastereomer determined by chiral HPLC. ND: not determined.

**Table S4:** Aldol reaction of **1A** with **2a** using representative bifunctional amine catalysts<sup>a</sup>

| Amine                    | T (°C) | t (h) | Yield (%) <sup>b</sup> | <i>anti:syn</i> <sup>c</sup> | <i>ee</i> (%) <sup>d</sup> |
|--------------------------|--------|-------|------------------------|------------------------------|----------------------------|
| (L)-Proline <sup>e</sup> | 0      | 48    | 40/30                  | 1:1                          | ND                         |
|                          | 0      | 72    | 60                     | 2:1                          | 90                         |
|                          | -20    | 48    | NR                     | --                           | --                         |
|                          | 0      | 72    | 52                     | 1:1                          | 97                         |
|                          | -20    | 48    | NR                     | --                           | --                         |

Ar: 3,5 (CF<sub>3</sub>)<sub>2</sub>C<sub>6</sub>H<sub>3</sub>

<sup>a</sup> Reactions conducted on a 0.5 mmol scale in 0.5 mL of THF (mol ratio of **1/2**/amine, 3:1:0.2). <sup>b</sup> Isolated yield of cross aldol product/self-aldol (dehydration). <sup>c</sup> Determined by <sup>1</sup>H NMR. <sup>d</sup> Determined by chiral HPLC. <sup>e</sup> No Brønsted acid added; DMF as solvent; syringe pump was not used. N.R.: no reaction; N.D.: not determined.

## J) Determination of the relative and absolute configuration of adducts

### Relative configuration

Assignment the relative *syn* and *anti* configuration to adducts was primarily made on the bases of the  $J_{2,3}$  coupling constants and then by NOESY experiments. In general  ${}^3J_{2,3}$  (*anti*) >  ${}^3J_{2,3}$  (*syn*) for diols<sup>25</sup>.

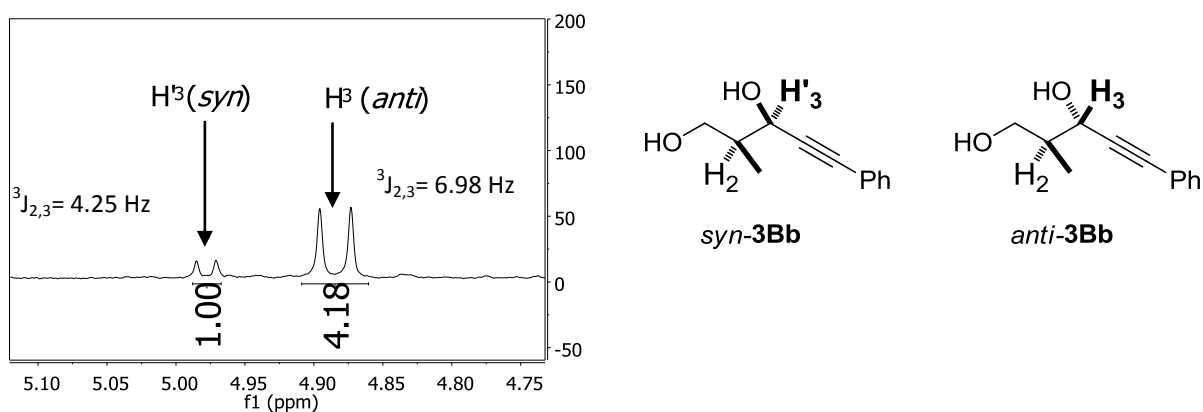

### Absolute configuration

The absolute configuration was determined by correlating HPLC chromatograms with literature values as follow:

1) The non selective reaction between hydrocinnamaldehyde **1A** and phenyl propargyl aldehyde (**2f**) promoted by racemic catalyst **4** followed by reduction and hydrogenation led to the racemic sample of the corresponding adduct containing the two *syn/anti* diastereomers.

<sup>25</sup> Heathcock, C.H. "The Aldol Addition Reaction" in "Asymmetric Synthesis"; Morrison J.D., Ed.; Academic Press: New York, 1983; Vol 3, Chapter 2, pp. 111-212.

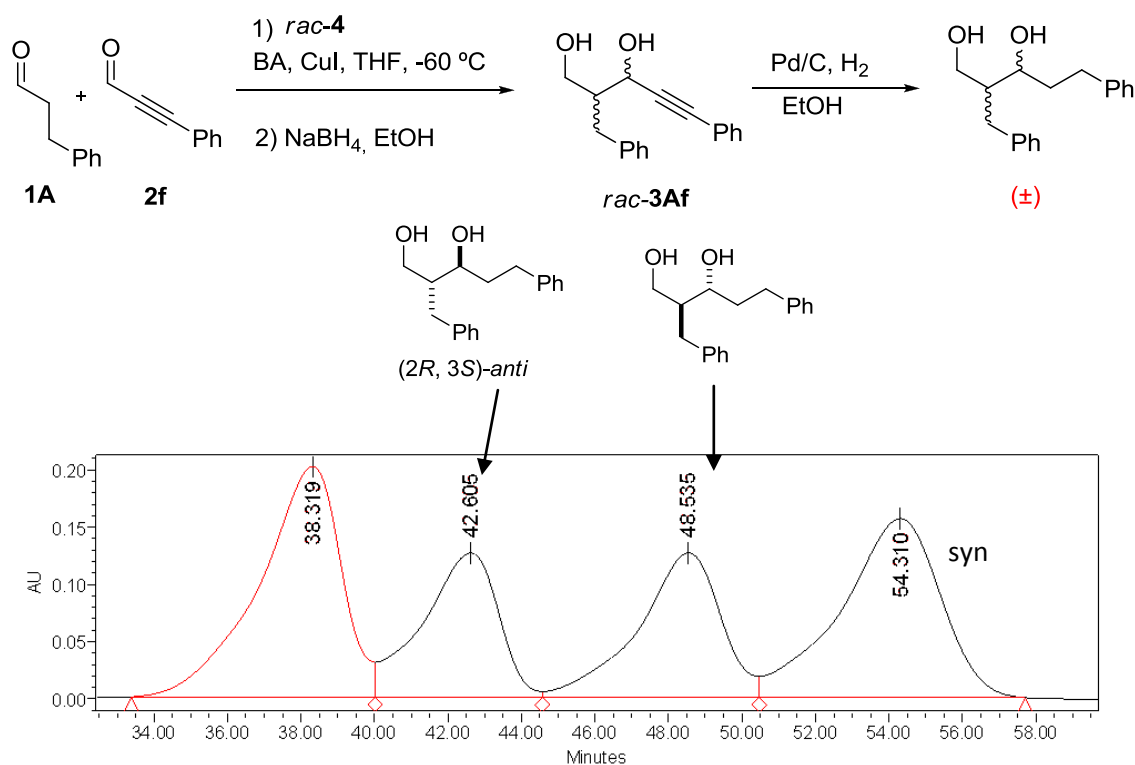

2) Self aldol reaction of hydrocinnamaldehyde **1A** using *L*-Proline as catalyst, provided the corresponding adduct as a 80:20 *anti/syn* mixture of diastereomers.<sup>26</sup>

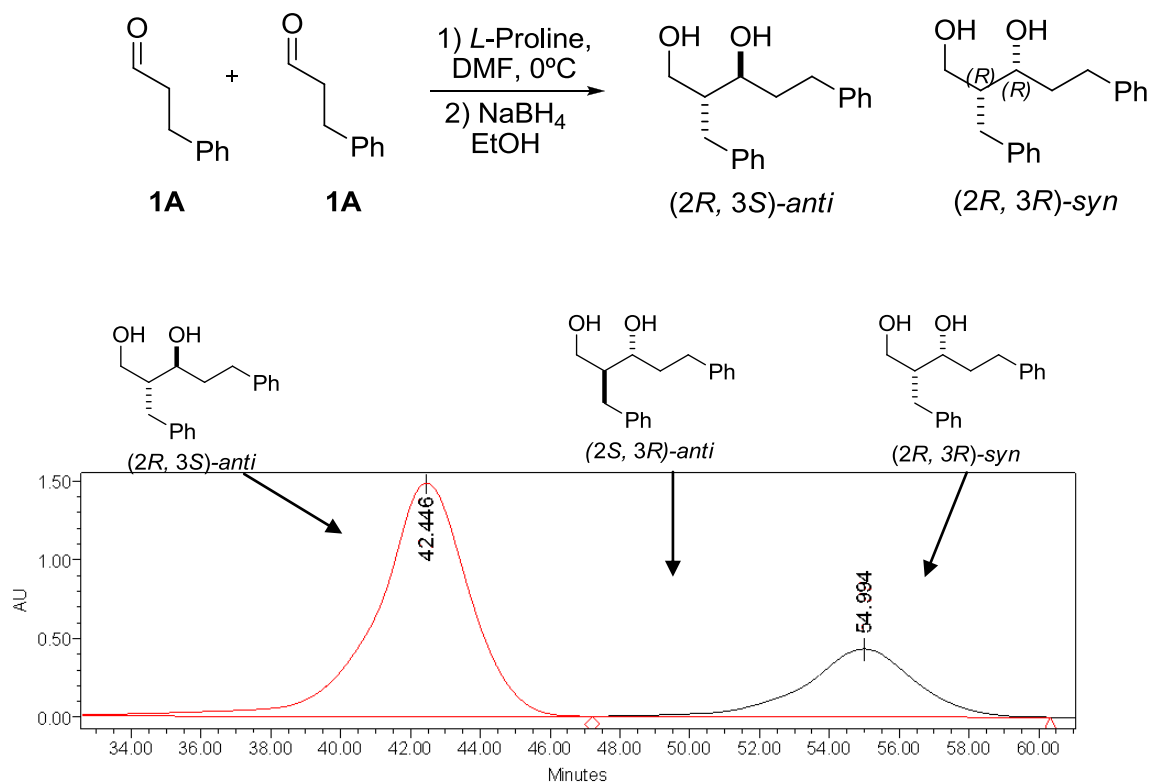

<sup>26</sup> Experimental procedure adapted from: I.K. Mangion, A. B. Northrup, D. W. C. MacMillan. *Angew. Chem. Int. Ed.* **2004**, *43*, 6722-24

- 3) The reaction between aldehydes **1A** and **2f** in the presence of catalyst **3**, followed by reduction and subsequent hydrogenation of the resulting **3Af** adduct, provided stereoisomer (2*S*, 3*R*)-*anti*, the opposite enantiomer to obtained using *L*-proline as catalyst.

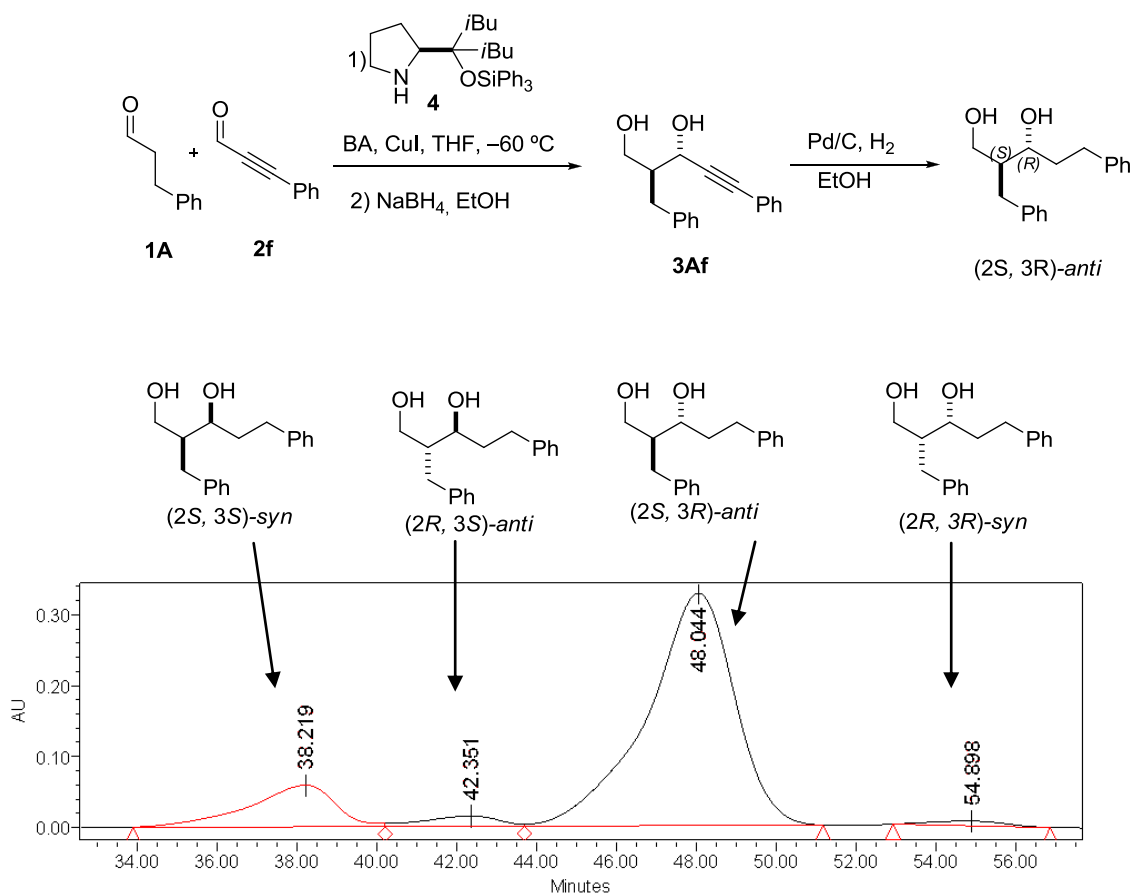

Configuration of the other adducts was established by assuming a uniform reaction mechanism and by X-ray analysis of compound **19** (see below).

### (2*S*, 3*R*)-2-Benzyl-5-phenylpentane-1,3-diol

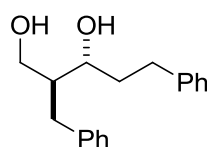

Prepared according to the General Procedure starting from hydrocinnamaldehyde **1A** (0.2 mL, 1.5 mmol) and phenylpropionaldehyde **2f** (61 μL, 0.5 mmol). The crude material was purified by flash column chromatography on silica gel (eluent



hexane/ ethyl acetate 80/20) to give compound **3Ab** as a white solid. The solid was then dissolved in EtOH (2 mL) 20 wt% Pd/C (60 mg) was added and the mixture was stirred at room temperature under H<sub>2</sub> atmosphere (1 atm) overnight. The mixture was then filtered through Celite® and concentrated under vacuum. The title compound was obtained as colourless oil. Mixture of isomers *anti:syn* 85:15. Yield: 70 % (94mg).  $[\alpha]_D^{24} = +15.9$  ( $c=1, dr$  85:15, 93 % ee CH<sub>2</sub>Cl<sub>2</sub>).

### **(2R,3S)-2-Benzyl-5-phenylpentane-1,3-diol**

Prepared according to the procedure reported in the literature<sup>27</sup> using *L*-proline as catalyst. The physical and spectroscopic data were in agreement with those described in the literature.<sup>28</sup>  $[\alpha]_D^{24} = +7.4$  ( $c=1, dr$  75:25, 99 % ee, CH<sub>2</sub>Cl<sub>2</sub>).

The enantiomeric purity of the major and minor diastereoisomers was determined by HPLC analysis (Daicel Chiralpak IB hexane/isopropanol/EtOH 98/1/1, flow rate= 1 mL/min, retention times: *syn*: 38.3 min (minor) and 54.9min (major); *anti*: 42.3 min (major) and 48.0 min (minor)).

---

<sup>27</sup> Adapted from the literature (A. B. Northrup, D.W.C MacMillan, *J. Am. Chem. Soc.* **2002**, *124*, 6798-6799.), but without using syringe pump

<sup>28</sup>.A. Seifert, U. Scheffler, M. Markert, R Mahrwald; *Org. Lett.*, **2010**, *12*.1660.

## K) Determination of absolute/relative configuration of **19** by X-Ray analysis.

### ORTEP diagram of compound **19**

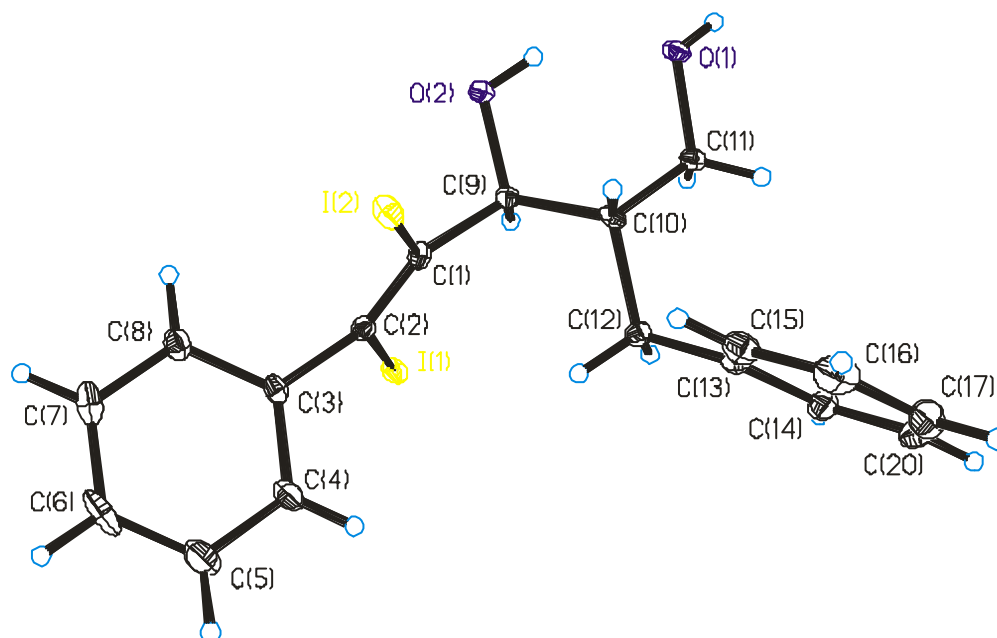

Absolute configuration of **19** (2*S*, 3*S*) was unequivocally established by a single-crystal X-ray analysis (absolute structure parameter: 0.04(2); Flack, H. D. *Acta Cryst.* **1983** A39, 876).

**Crystallographic Studies** Suitable single crystals of the title compound for X-ray study were grown from a solution in dichloromethane/hexane. Crystal data and refinement are summarized in Table S5 for compound **19**. A colourless prism (0.15 × 0.09 × 0.02 mm) was selected and mounted on a Bruker X8 APEX area diffractometer. Unit-cell parameters were determined from 1271 frames of intensity data covering 0.3° in  $\omega$  over a hemisphere of the reciprocal space by combination of three exposure sets, and refined by the least-squares method. Intensities were collected with graphite monochromatized Mo- $K\alpha$  radiation ( $\lambda = 0.71073 \text{ \AA}$ ), using the  $\omega/2\theta$  scan-technique. A total of 3395 independent reflections for **19** were measured in the range  $2.43 \leq \theta \leq 25.08$ . Lorentz-polarization and absorption corrections were made.

The structures were solved by direct methods using the SHELXS computer program<sup>[1]</sup> and refined by the full-matrix least-squares method with the SHELX97 computer program,<sup>[1]</sup> using 3395 reflections for **19**. The function minimized were  $\sum w | |F_o|^2 - |F_c|^2 |^2$ , where  $w = [\sigma^2(I) + (0.0382P)^2 + 0.0000P]^{-1}$  for **19** and  $P = (|F_o|^2 + 2|F_c|^2)/3$ .  $f$ ,  $f'$  and  $f''$  were taken from International Tables of X-ray Crystallography.<sup>[2]</sup> All hydrogen atoms were computed and refined using a riding model. The final R (on F) factor was 0.0235,  $wR$  (on  $|F|^2$ ) = 0.0659 and goodness of fit = 1.164 for all observed reflections. The number of refined parameters was 203. Max. shift/esd = 0.001, Mean shift/esd = 0.00. Max. and min. peaks in final difference synthesis was 0.674 and -0.576 eÅ<sup>-3</sup>, respectively.

**Table S5.** Crystal data and structure refinement for **19**.

|                                 |                                             |                       |
|---------------------------------|---------------------------------------------|-----------------------|
| Identification code             | ltot7.35                                    |                       |
| Empirical formula               | C18 H18 I2 O2                               |                       |
| Formula weight                  | 520.12                                      |                       |
| Temperature                     | 298(2) K                                    |                       |
| Wavelength                      | 0.71073 Å                                   |                       |
| Crystal system                  | Orthorhombic                                |                       |
| Space group                     | P2(1)2(1)2(1)                               |                       |
| Unit cell dimensions            | a = 7.7537(2) Å                             | $\alpha = 90^\circ$ . |
|                                 | b = 8.7833(3) Å                             | $\beta = 90^\circ$ .  |
|                                 | c = 28.0793(10) Å                           | $\gamma = 90^\circ$ . |
| Volume                          | 1912.29(11) Å <sup>3</sup>                  |                       |
| Z                               | 4                                           |                       |
| Density (calculated)            | 1.807 Mg/m <sup>3</sup>                     |                       |
| Absorption coefficient          | 3.293 mm <sup>-1</sup>                      |                       |
| F(000)                          | 992                                         |                       |
| Crystal size                    | 0.15 x 0.09 x 0.02 mm <sup>3</sup>          |                       |
| Theta range for data collection | 2.43 to 25.08°.                             |                       |
| Index ranges                    | -9<=h<=9, -10<=k<=10, -33<=l<=33            |                       |
| Reflections collected           | 20538                                       |                       |
| Independent reflections         | 3395 [R(int) = 0.0475]                      |                       |
| Completeness to theta = 25.08°  | 99.8 %                                      |                       |
| Absorption correction           | Semi-empirical from equivalent              |                       |
| Max. and min. transmission      | 0.9477 and 0.6379                           |                       |
| Refinement method               | Full-matrix least-squares on F <sup>2</sup> |                       |

|                                      |                                    |
|--------------------------------------|------------------------------------|
| Data / restraints / parameters       | 3395 / 0 / 203                     |
| Goodness-of-fit on $F^2$             | 1.164                              |
| Final R indices [ $I > 2\sigma(I)$ ] | R1 = 0.0204, wR2 = 0.0485          |
| R indices (all data)                 | R1 = 0.0235, wR2 = 0.0659          |
| Absolute structure parameter         | -0.05(4)                           |
| Largest diff. peak and hole          | 0.674 and -0.576 e.Å <sup>-3</sup> |

**Table S6.** Atomic coordinates ( $\times 10^4$ ) and equivalent isotropic displacement parameters ( $\text{Å}^2 \times 10^3$ ) for **19**.  $U(\text{eq})$  is defined as one third of the trace of the orthogonalized  $U_{ij}$  tensor.

|       | x        | y       | z       | $U(\text{eq})$ |
|-------|----------|---------|---------|----------------|
| I(1)  | 11818(1) | 3963(1) | 1938(1) | 21(1)          |
| I(2)  | 6315(1)  | 6641(1) | 1489(1) | 24(1)          |
| O(1)  | 4554(5)  | 1679(5) | 2200(1) | 21(1)          |
| O(2)  | 6423(5)  | 4094(4) | 2369(1) | 20(1)          |
| C(1)  | 8210(7)  | 5113(6) | 1762(2) | 18(1)          |
| C(2)  | 9854(7)  | 5480(6) | 1710(2) | 17(1)          |
| C(3)  | 10576(7) | 6887(6) | 1492(2) | 19(1)          |
| C(4)  | 11342(8) | 6828(7) | 1046(2) | 34(2)          |
| C(5)  | 12059(9) | 8137(8) | 848(2)  | 44(2)          |
| C(6)  | 12060(9) | 9464(8) | 1095(2) | 39(2)          |
| C(7)  | 11341(8) | 9525(7) | 1553(2) | 33(1)          |
| C(8)  | 10610(8) | 8231(6) | 1749(2) | 25(1)          |
| C(9)  | 7463(6)  | 3671(6) | 1973(2) | 16(1)          |
| C(10) | 6476(6)  | 2706(6) | 1613(2) | 16(1)          |
| C(11) | 5793(6)  | 1259(6) | 1847(2) | 20(1)          |
| C(12) | 7589(7)  | 2293(6) | 1178(2) | 20(1)          |
| C(13) | 6552(7)  | 1652(6) | 768(2)  | 21(1)          |
| C(14) | 6835(9)  | 179(7)  | 601(2)  | 29(1)          |
| C(15) | 5318(8)  | 2527(8) | 542(2)  | 29(1)          |
| C(16) | 4354(9)  | 1993(9) | 171(2)  | 41(2)          |
| C(17) | 4638(9)  | 535(9)  | 12(2)   | 42(2)          |
| C(20) | 5867(10) | -367(8) | 223(2)  | 42(2)          |

**Table S7.** Bond lengths [Å] and angles [°] for **19**.

|              |           |                  |           |
|--------------|-----------|------------------|-----------|
| I(1)-C(2)    | 2.122(5)  | C(16)-C(17)      | 1.374(11) |
| I(2)-C(1)    | 2.133(5)  | C(16)-H(16A)     | 0.9300    |
| O(1)-C(11)   | 1.430(6)  | C(17)-C(20)      | 1.373(10) |
| O(1)-H(1A)   | 0.86(5)   | C(17)-H(17A)     | 0.9300    |
| O(2)-C(9)    | 1.422(6)  | C(20)-H(20A)     | 0.9300    |
| O(2)-H(2A)   | 0.8200    |                  |           |
| C(1)-C(2)    | 1.323(8)  | C(11)-O(1)-H(1A) | 108(3)    |
| C(1)-C(9)    | 1.514(7)  | C(9)-O(2)-H(2A)  | 109.5     |
| C(2)-C(3)    | 1.490(7)  | C(2)-C(1)-C(9)   | 128.0(5)  |
| C(3)-C(8)    | 1.384(8)  | C(2)-C(1)-I(2)   | 118.1(4)  |
| C(3)-C(4)    | 1.387(8)  | C(9)-C(1)-I(2)   | 113.8(4)  |
| C(4)-C(5)    | 1.394(9)  | C(1)-C(2)-C(3)   | 127.6(5)  |
| C(4)-H(4A)   | 0.9300    | C(1)-C(2)-I(1)   | 120.4(4)  |
| C(5)-C(6)    | 1.356(10) | C(3)-C(2)-I(1)   | 112.1(4)  |
| C(5)-H(5A)   | 0.9300    | C(8)-C(3)-C(4)   | 119.7(5)  |
| C(6)-C(7)    | 1.404(9)  | C(8)-C(3)-C(2)   | 120.0(5)  |
| C(6)-H(6A)   | 0.9300    | C(4)-C(3)-C(2)   | 120.1(5)  |
| C(7)-C(8)    | 1.383(8)  | C(3)-C(4)-C(5)   | 120.0(6)  |
| C(7)-H(7A)   | 0.9300    | C(3)-C(4)-H(4A)  | 120.0     |
| C(8)-H(8A)   | 0.9300    | C(5)-C(4)-H(4A)  | 120.0     |
| C(9)-C(10)   | 1.526(7)  | C(6)-C(5)-C(4)   | 120.3(6)  |
| C(9)-H(9A)   | 0.9800    | C(6)-C(5)-H(5A)  | 119.8     |
| C(10)-C(11)  | 1.526(7)  | C(4)-C(5)-H(5A)  | 119.8     |
| C(10)-C(12)  | 1.538(7)  | C(5)-C(6)-C(7)   | 120.1(6)  |
| C(10)-H(10A) | 0.9800    | C(5)-C(6)-H(6A)  | 120.0     |
| C(11)-H(11A) | 0.9700    | C(7)-C(6)-H(6A)  | 120.0     |
| C(11)-H(11B) | 0.9700    | C(8)-C(7)-C(6)   | 119.7(6)  |
| C(12)-C(13)  | 1.512(7)  | C(8)-C(7)-H(7A)  | 120.1     |
| C(12)-H(12A) | 0.9700    | C(6)-C(7)-H(7A)  | 120.1     |
| C(12)-H(12B) | 0.9700    | C(7)-C(8)-C(3)   | 120.1(5)  |
| C(13)-C(15)  | 1.382(8)  | C(7)-C(8)-H(8A)  | 120.0     |
| C(13)-C(14)  | 1.394(8)  | C(3)-C(8)-H(8A)  | 120.0     |
| C(14)-C(20)  | 1.385(9)  | O(2)-C(9)-C(1)   | 107.7(4)  |
| C(14)-H(14A) | 0.9300    | O(2)-C(9)-C(10)  | 112.3(4)  |
| C(15)-C(16)  | 1.366(9)  | C(1)-C(9)-C(10)  | 113.3(4)  |
| C(15)-H(15A) | 0.9300    | O(2)-C(9)-H(9A)  | 107.8     |

|                     |          |                     |          |
|---------------------|----------|---------------------|----------|
| C(1)-C(9)-H(9A)     | 107.8    | H(12A)-C(12)-H(12B) | 107.8    |
| C(10)-C(9)-H(9A)    | 107.8    | C(15)-C(13)-C(14)   | 118.0(5) |
| C(9)-C(10)-C(11)    | 110.6(4) | C(15)-C(13)-C(12)   | 120.7(5) |
| C(9)-C(10)-C(12)    | 112.1(4) | C(14)-C(13)-C(12)   | 121.2(5) |
| C(11)-C(10)-C(12)   | 109.9(4) | C(20)-C(14)-C(13)   | 119.6(6) |
| C(9)-C(10)-H(10A)   | 108.1    | C(20)-C(14)-H(14A)  | 120.2    |
| C(11)-C(10)-H(10A)  | 108.1    | C(13)-C(14)-H(14A)  | 120.2    |
| C(12)-C(10)-H(10A)  | 108.1    | C(16)-C(15)-C(13)   | 122.6(6) |
| O(1)-C(11)-C(10)    | 108.5(4) | C(16)-C(15)-H(15A)  | 118.7    |
| O(1)-C(11)-H(11A)   | 110.0    | C(13)-C(15)-H(15A)  | 118.7    |
| C(10)-C(11)-H(11A)  | 110.0    | C(15)-C(16)-C(17)   | 118.6(7) |
| O(1)-C(11)-H(11B)   | 110.0    | C(15)-C(16)-H(16A)  | 120.7    |
| C(10)-C(11)-H(11B)  | 110.0    | C(17)-C(16)-H(16A)  | 120.7    |
| H(11A)-C(11)-H(11B) | 108.4    | C(20)-C(17)-C(16)   | 120.6(6) |
| C(13)-C(12)-C(10)   | 113.2(4) | C(20)-C(17)-H(17A)  | 119.7    |
| C(13)-C(12)-H(12A)  | 108.9    | C(16)-C(17)-H(17A)  | 119.7    |
| C(10)-C(12)-H(12A)  | 108.9    | C(17)-C(20)-C(14)   | 120.4(6) |
| C(13)-C(12)-H(12B)  | 108.9    | C(17)-C(20)-H(20A)  | 119.8    |
| C(10)-C(12)-H(12B)  | 108.9    | C(14)-C(20)-H(20A)  | 119.8    |

---

Symmetry transformations used to generate equivalent atoms:

**Table S8.** Anisotropic displacement parameters ( $\text{\AA}^2 \times 10^3$ ) for **19**. The anisotropic displacement factor exponent takes the form:  $-2\pi^2 [h^2 a^{*2} U^{11} + \dots + 2 h k a^* b^* U^{12}]$

|       | $U^{11}$ | $U^{22}$ | $U^{33}$ | $U^{23}$ | $U^{13}$ | $U^{12}$ |
|-------|----------|----------|----------|----------|----------|----------|
| I(1)  | 12(1)    | 22(1)    | 30(1)    | 1(1)     | 1(1)     | 0(1)     |
| I(2)  | 18(1)    | 19(1)    | 35(1)    | 8(1)     | -2(1)    | 1(1)     |
| O(1)  | 20(2)    | 18(2)    | 24(2)    | 5(2)     | 9(2)     | -1(2)    |
| O(2)  | 20(2)    | 18(2)    | 22(2)    | -1(2)    | 7(2)     | -2(2)    |
| C(1)  | 20(3)    | 14(2)    | 20(2)    | -1(2)    | -2(2)    | 2(2)     |
| C(2)  | 19(3)    | 14(3)    | 18(3)    | 0(2)     | 0(2)     | 1(2)     |
| C(3)  | 17(3)    | 20(3)    | 19(3)    | 2(2)     | -6(2)    | -5(2)    |
| C(4)  | 37(4)    | 36(3)    | 28(3)    | 0(3)     | 6(3)     | -18(3)   |
| C(5)  | 47(4)    | 52(4)    | 33(3)    | 3(3)     | 3(3)     | -24(4)   |
| C(6)  | 29(4)    | 40(4)    | 48(4)    | 24(3)    | -13(3)   | -21(3)   |
| C(7)  | 36(3)    | 21(3)    | 42(4)    | 3(3)     | -13(3)   | -7(3)    |
| C(8)  | 29(3)    | 22(3)    | 25(3)    | 3(3)     | -2(2)    | -5(3)    |
| C(9)  | 11(2)    | 16(3)    | 20(2)    | -2(2)    | 0(2)     | 3(2)     |
| C(10) | 10(3)    | 20(3)    | 18(2)    | 6(2)     | 1(2)     | 1(2)     |
| C(11) | 16(3)    | 22(3)    | 24(3)    | -1(2)    | 4(2)     | 0(2)     |
| C(12) | 19(3)    | 20(3)    | 23(3)    | -2(2)    | 3(2)     | 2(2)     |
| C(13) | 26(3)    | 25(3)    | 12(2)    | 3(2)     | 5(2)     | -6(3)    |
| C(14) | 38(3)    | 24(3)    | 24(3)    | 0(2)     | 7(3)     | -4(3)    |
| C(15) | 25(3)    | 37(4)    | 24(3)    | 9(3)     | -1(3)    | -1(3)    |
| C(16) | 34(4)    | 65(5)    | 24(3)    | 10(3)    | -6(3)    | -3(4)    |
| C(17) | 43(4)    | 64(5)    | 19(3)    | 0(3)     | -6(3)    | -21(4)   |
| C(20) | 57(5)    | 45(4)    | 25(3)    | -9(3)    | 14(3)    | -17(4)   |

—

**Table S9.** Hydrogen coordinates (  $\times 10^4$ ) and isotropic displacement parameters ( $\text{\AA}^2 \times 10^3$ ) for **19**.

|        | x        | y       | z        | U(eq)  |
|--------|----------|---------|----------|--------|
| H(1A)  | 4290(70) | 880(60) | 2363(18) | 13(14) |
| H(2A)  | 5648     | 3469    | 2403     | 30     |
| H(4A)  | 11377    | 5913    | 879      | 41     |
| H(5A)  | 12540    | 8101    | 544      | 53     |
| H(6A)  | 12537    | 10335   | 960      | 47     |
| H(7A)  | 11356    | 10430   | 1725     | 40     |
| H(8A)  | 10141    | 8265    | 2053     | 30     |
| H(9A)  | 8424     | 3057    | 2094     | 19     |
| H(10A) | 5486     | 3300    | 1501     | 19     |
| H(11A) | 5259     | 610     | 1609     | 24     |
| H(11B) | 6734     | 701     | 1993     | 24     |
| H(12A) | 8192     | 3197    | 1071     | 25     |
| H(12B) | 8448     | 1551    | 1273     | 25     |
| H(14A) | 7669     | -434    | 742      | 35     |
| H(15A) | 5138     | 3519    | 646      | 34     |
| H(16A) | 3521     | 2604    | 28       | 49     |
| H(17A) | 3992     | 155     | -240     | 51     |
| H(20A) | 6051     | -1350   | 111      | 51     |



**Table S10.** Torsion angles [°] for **19**

|                      |           |                         |           |
|----------------------|-----------|-------------------------|-----------|
| C(9)-C(1)-C(2)-C(3)  | 178.5(5)  | I(2)-C(1)-C(9)-C(10)    | 62.0(5)   |
| I(2)-C(1)-C(2)-C(3)  | 1.9(7)    | O(2)-C(9)-C(10)-C(11)   | -58.8(5)  |
| C(9)-C(1)-C(2)-I(1)  | 0.0(8)    | C(1)-C(9)-C(10)-C(11)   | 178.8(4)  |
| I(2)-C(1)-C(2)-I(1)  | -176.6(2) | O(2)-C(9)-C(10)-C(12)   | 178.2(4)  |
| C(1)-C(2)-C(3)-C(8)  | 78.7(7)   | C(1)-C(9)-C(10)-C(12)   | 55.8(6)   |
| I(1)-C(2)-C(3)-C(8)  | -102.8(5) | C(9)-C(10)-C(11)-O(1)   | 64.8(5)   |
| C(1)-C(2)-C(3)-C(4)  | -106.6(7) | C(12)-C(10)-C(11)-O(1)  | -171.0(4) |
| I(1)-C(2)-C(3)-C(4)  | 72.0(6)   | C(9)-C(10)-C(12)-C(13)  | -167.0(4) |
| C(8)-C(3)-C(4)-C(5)  | -3.4(9)   | C(11)-C(10)-C(12)-C(13) | 69.6(6)   |
| C(2)-C(3)-C(4)-C(5)  | -178.2(6) | C(10)-C(12)-C(13)-C(15) | 63.3(6)   |
| C(3)-C(4)-C(5)-C(6)  | 2.0(11)   | C(10)-C(12)-C(13)-C(14) | -118.1(5) |
| C(4)-C(5)-C(6)-C(7)  | 0.2(11)   | C(15)-C(13)-C(14)-C(20) | -1.0(8)   |
| C(5)-C(6)-C(7)-C(8)  | -0.9(10)  | C(12)-C(13)-C(14)-C(20) | -179.6(5) |
| C(6)-C(7)-C(8)-C(3)  | -0.5(9)   | C(14)-C(13)-C(15)-C(16) | 1.4(9)    |
| C(4)-C(3)-C(8)-C(7)  | 2.7(9)    | C(12)-C(13)-C(15)-C(16) | 180.0(5)  |
| C(2)-C(3)-C(8)-C(7)  | 177.5(5)  | C(13)-C(15)-C(16)-C(17) | -0.9(10)  |
| C(2)-C(1)-C(9)-O(2)  | 120.4(6)  | C(15)-C(16)-C(17)-C(20) | 0.0(10)   |
| I(2)-C(1)-C(9)-O(2)  | -62.8(4)  | C(16)-C(17)-C(20)-C(14) | 0.3(10)   |
| C(2)-C(1)-C(9)-C(10) | -114.7(6) | C(13)-C(14)-C(20)-C(17) | 0.2(9)    |

Symmetry transformations used to generate equivalent atoms:

**Table S11.** Hydrogen bonds for **19** [Å and °].

| D-H...A             | d(D-H)  | d(H...A) | d(D...A) | <(DHA) |
|---------------------|---------|----------|----------|--------|
| O(1)-H(1A)...O(2)#1 | 0.86(5) | 1.82(6)  | 2.682(5) | 172(5) |
| O(1)-H(1A)...I(2)#1 | 0.86(5) | 3.32(5)  | 3.741(4) | 113(4) |
| O(2)-H(2A)...O(1)   | 0.82    | 1.88     | 2.613(5) | 149.0  |
| O(2)-H(2A)...I(1)#2 | 0.82    | 3.27     | 3.772(4) | 121.9  |

Symmetry transformations used to generate equivalent atoms:

#1 -x+1,y-1/2,-z+1/2 #2 x-1,y,z

**L)  $^1\text{H}$  and  $^{13}\text{C}$  RMN of compounds.**

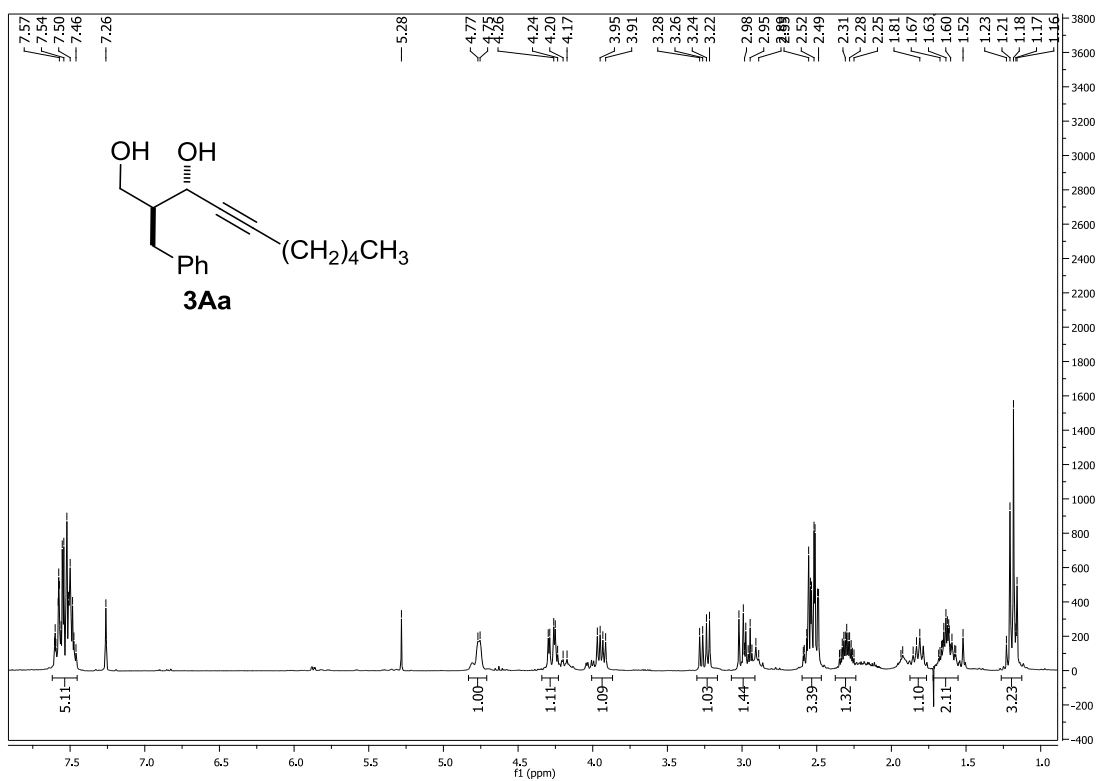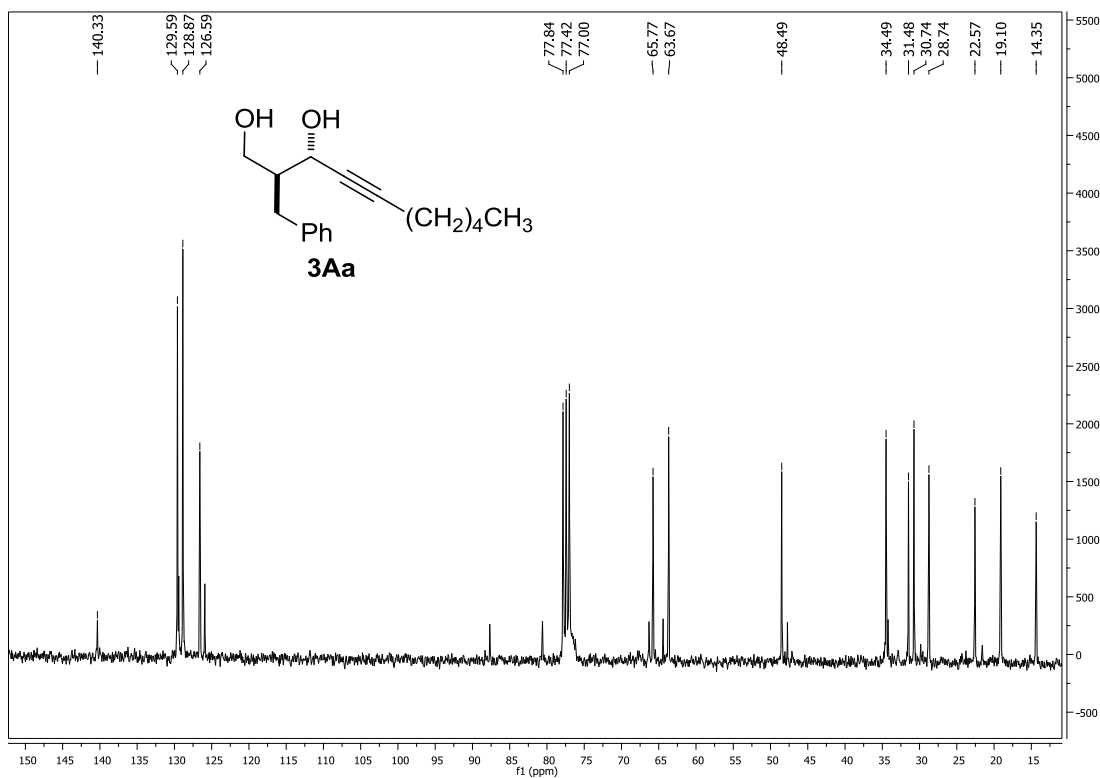

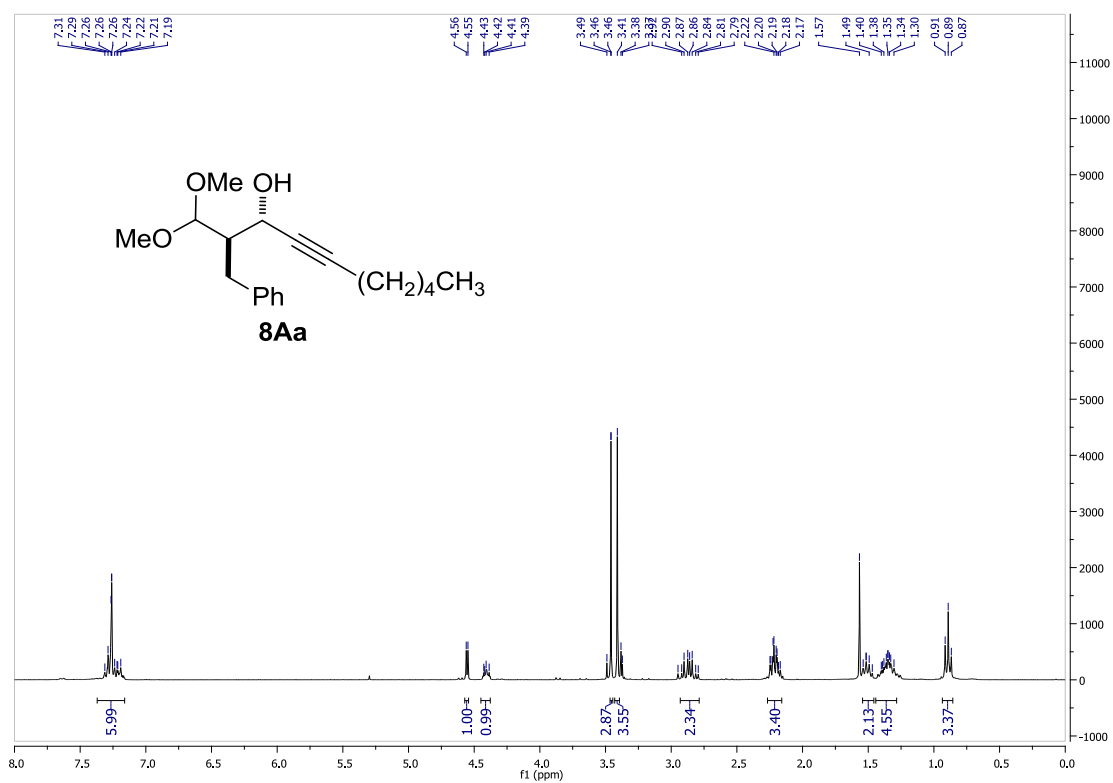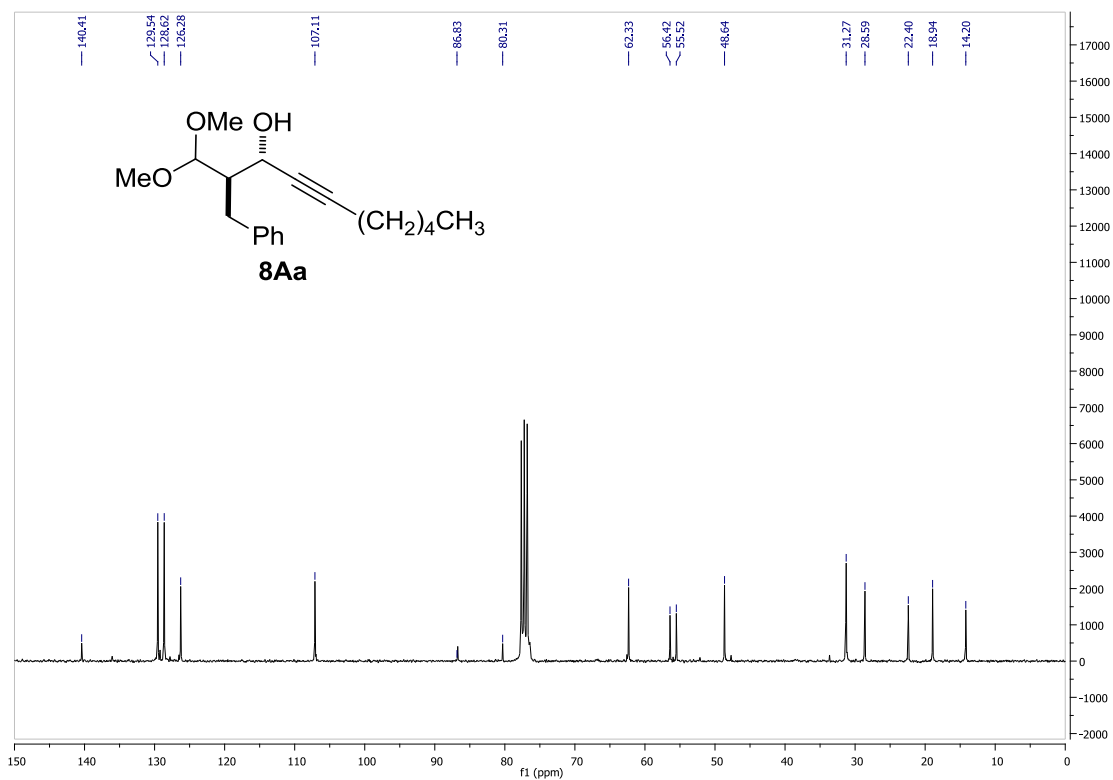

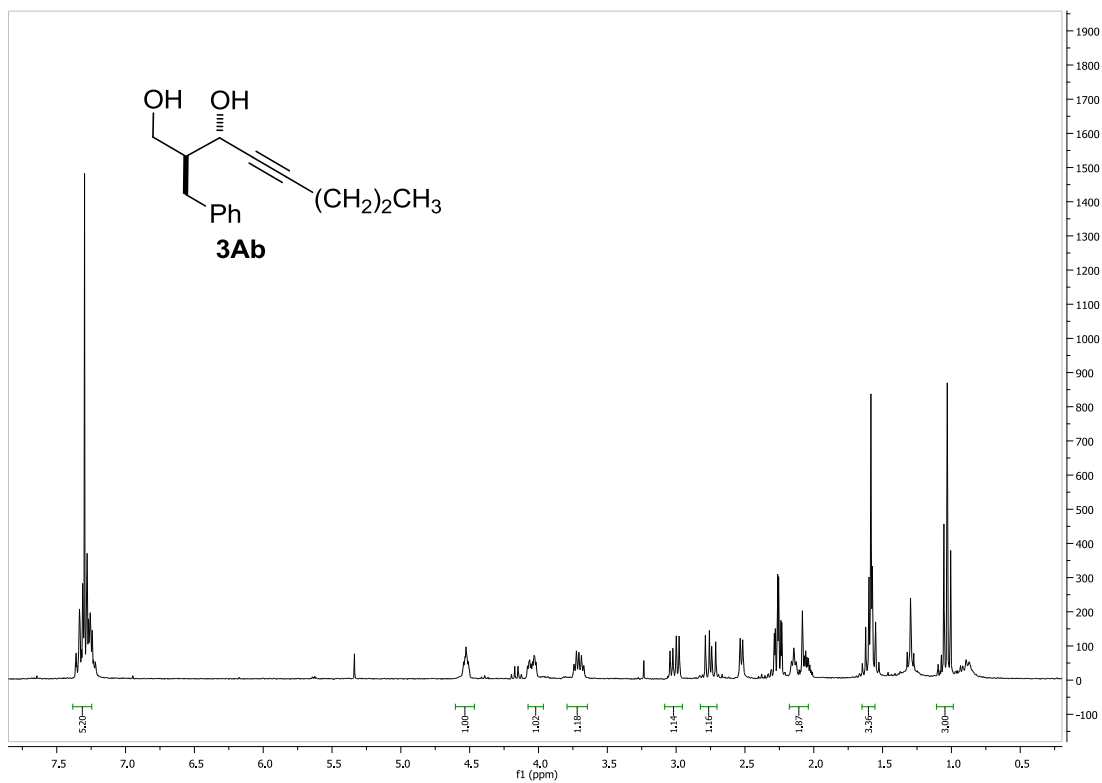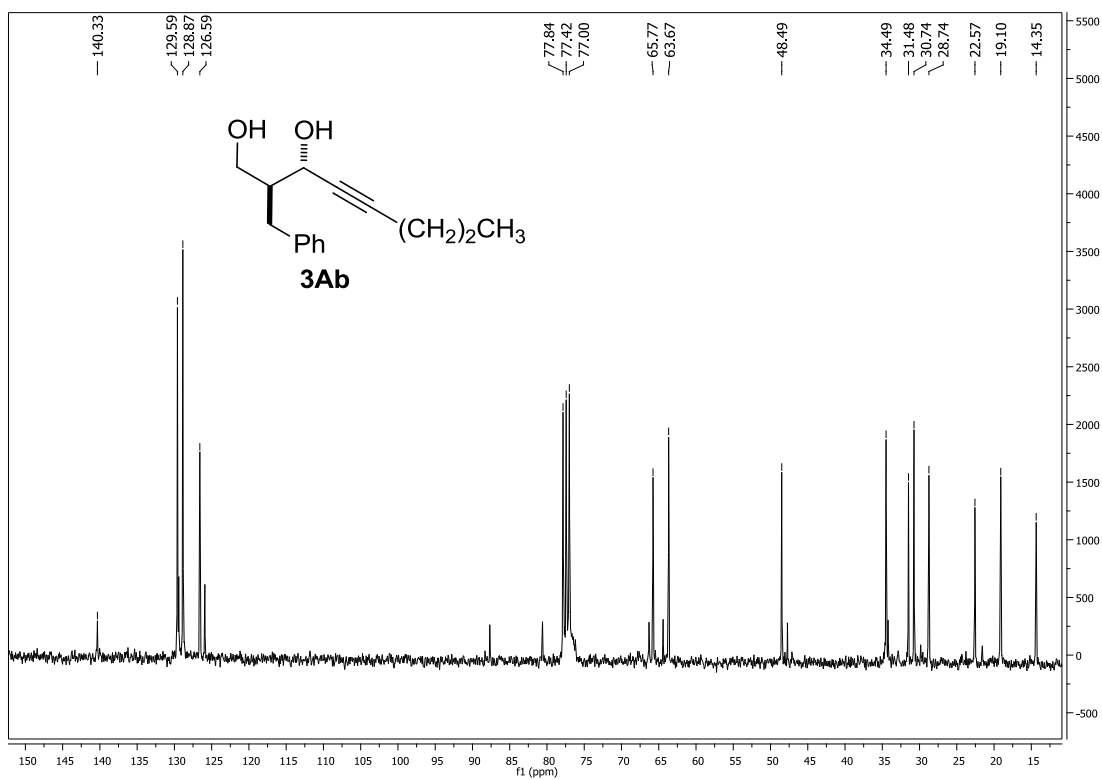

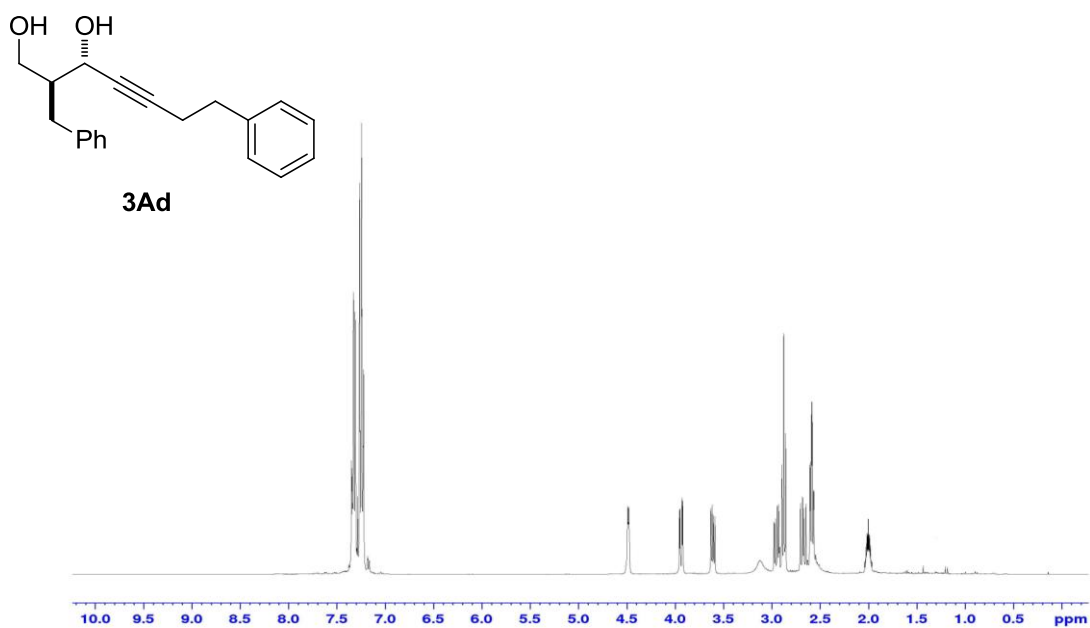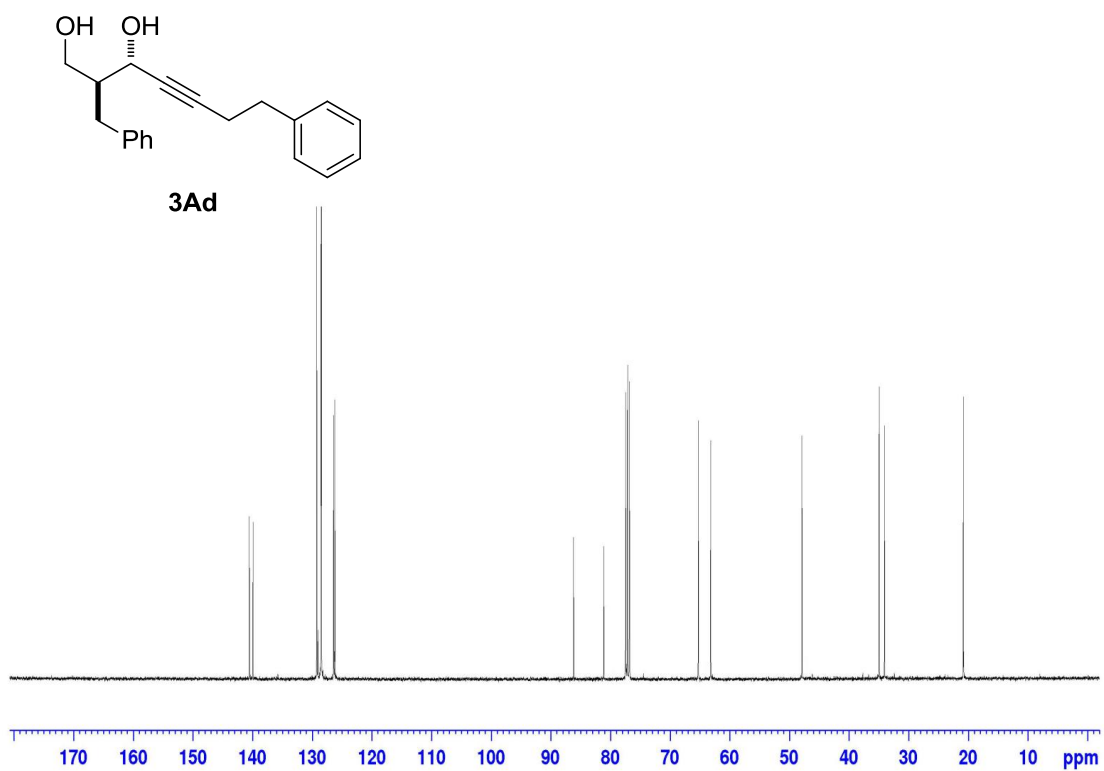

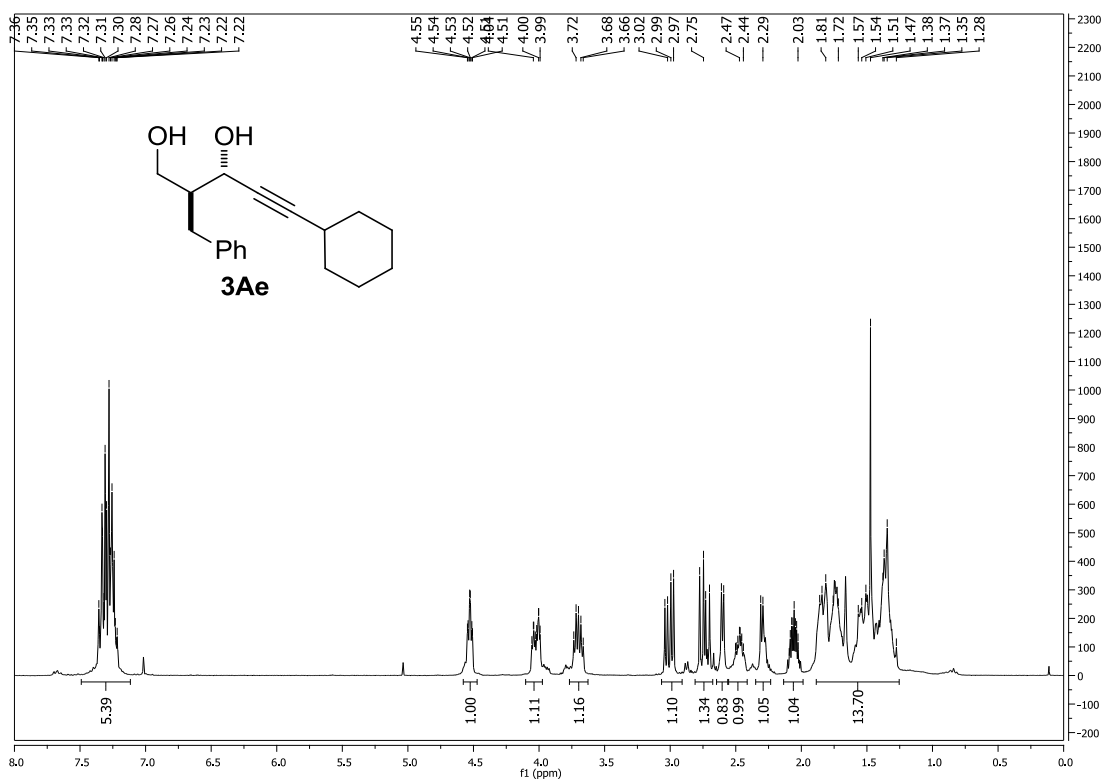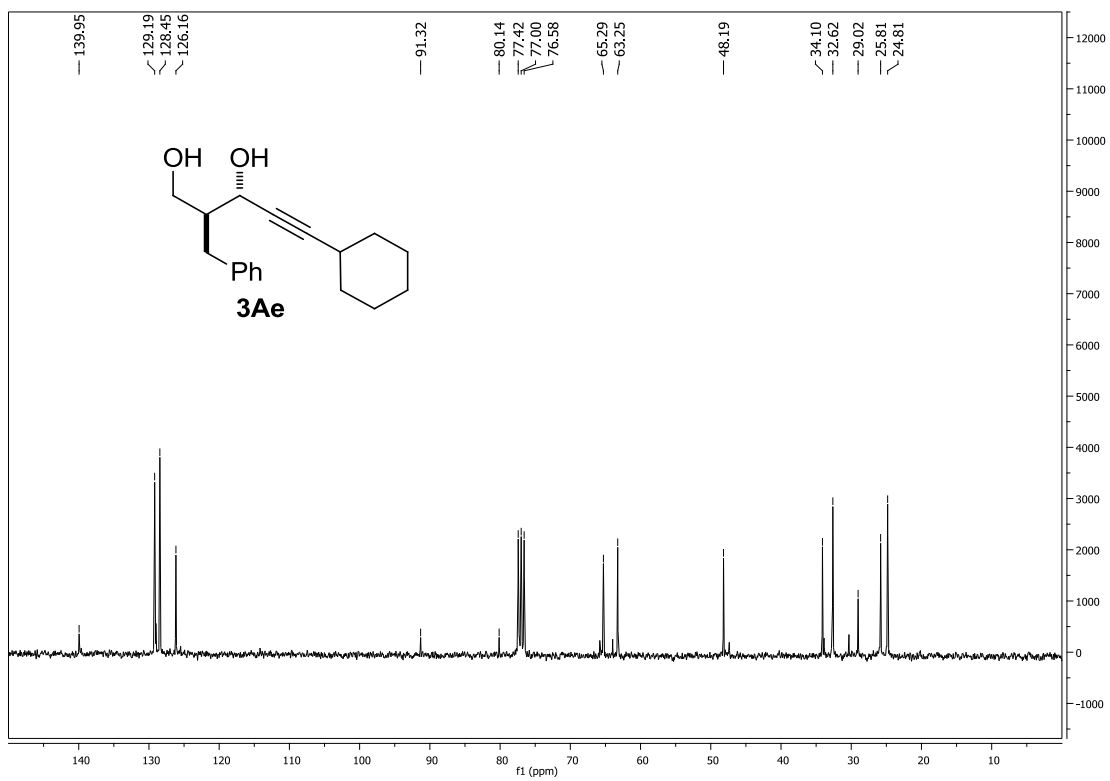

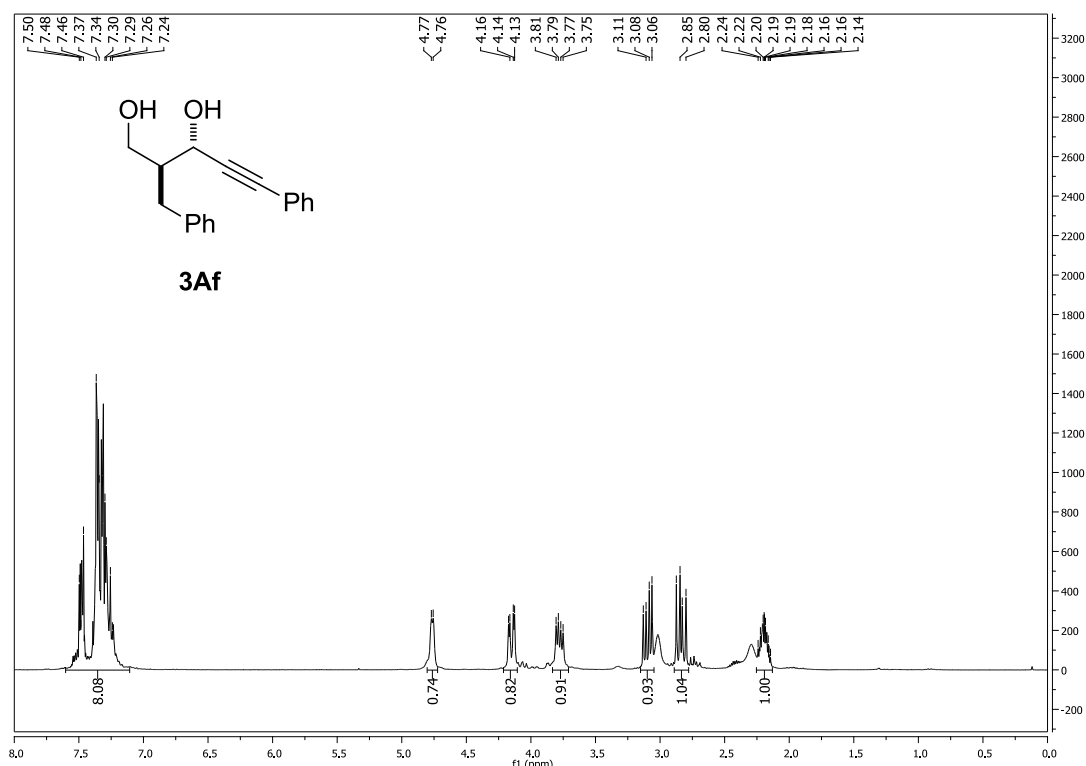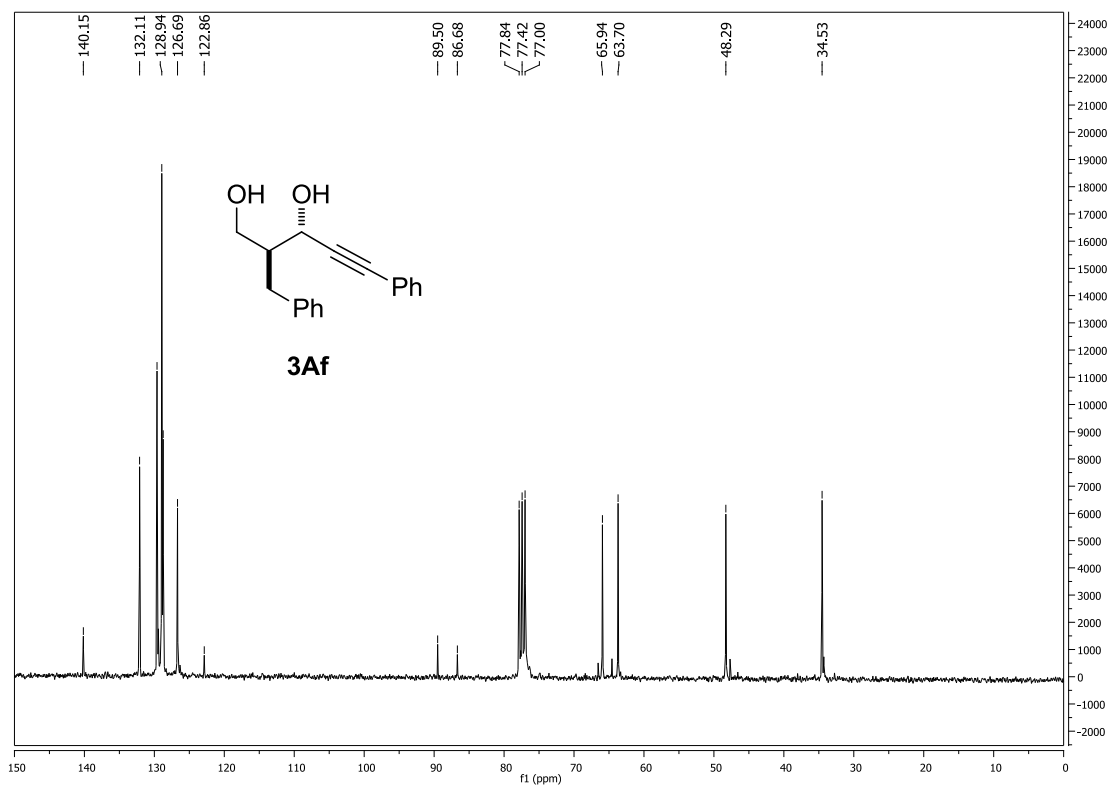



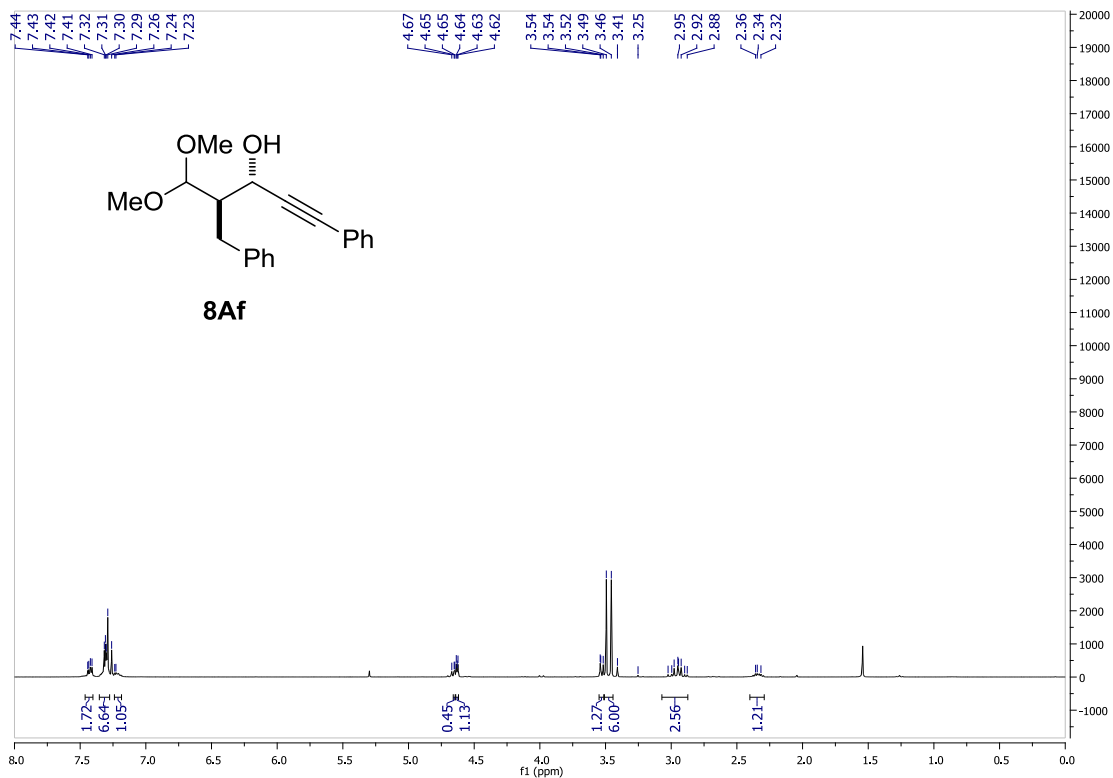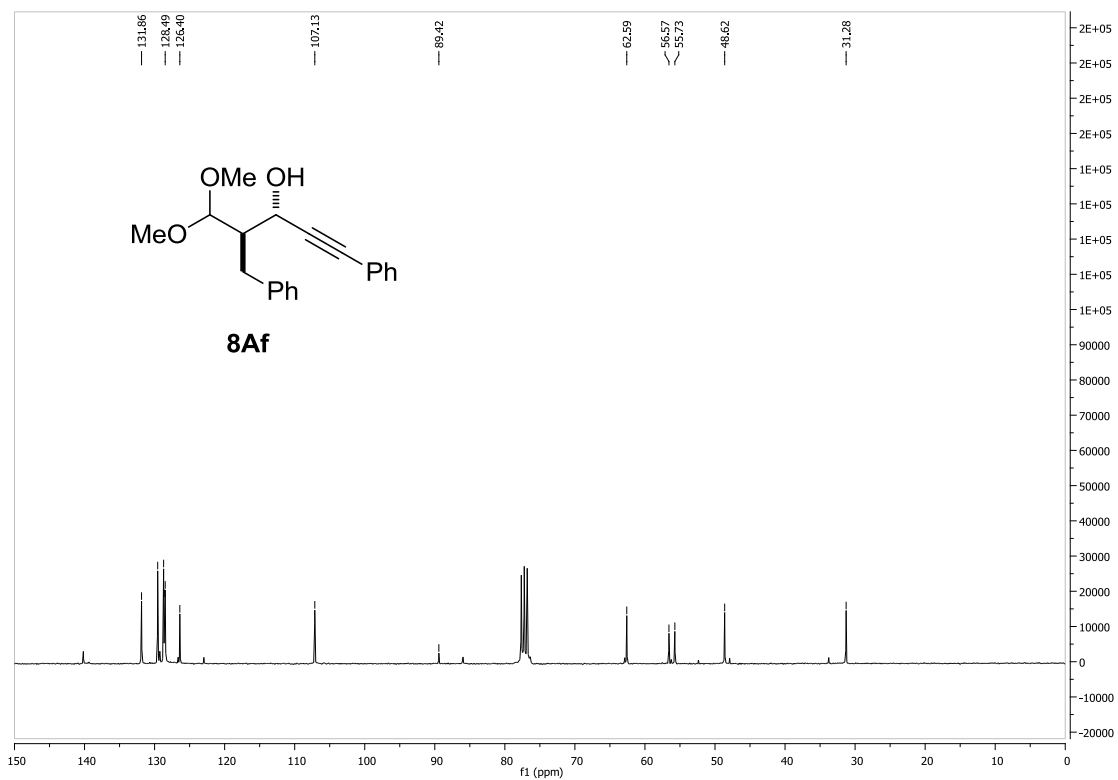

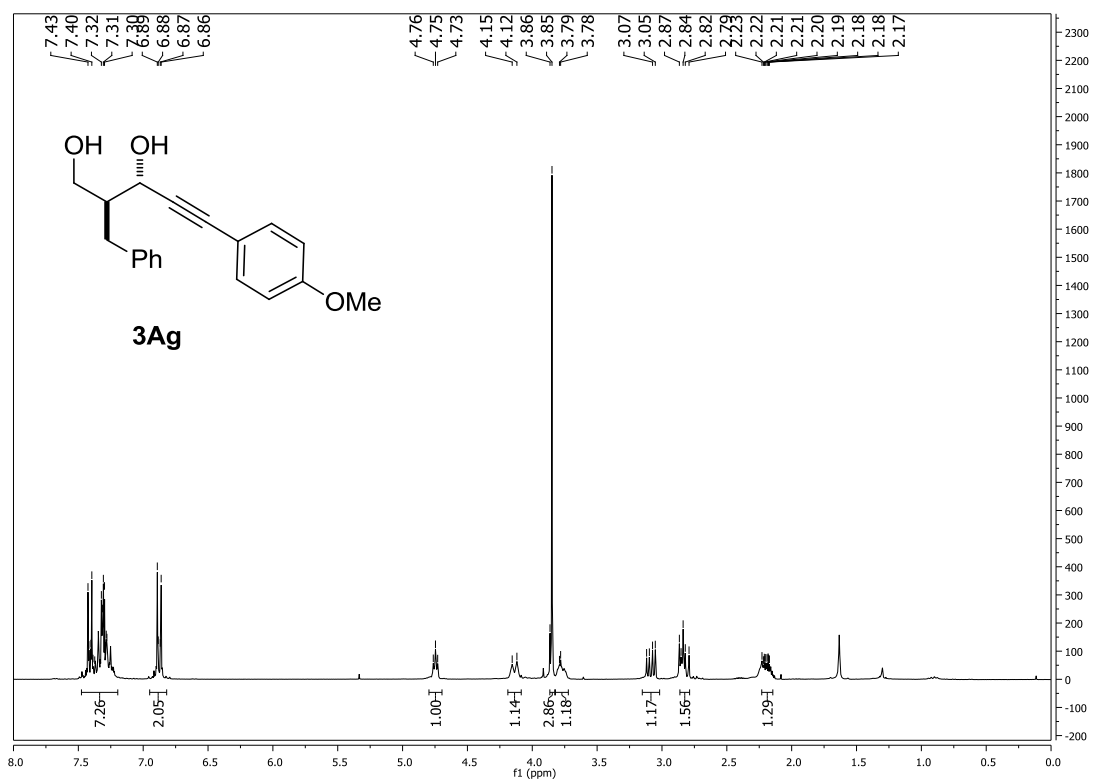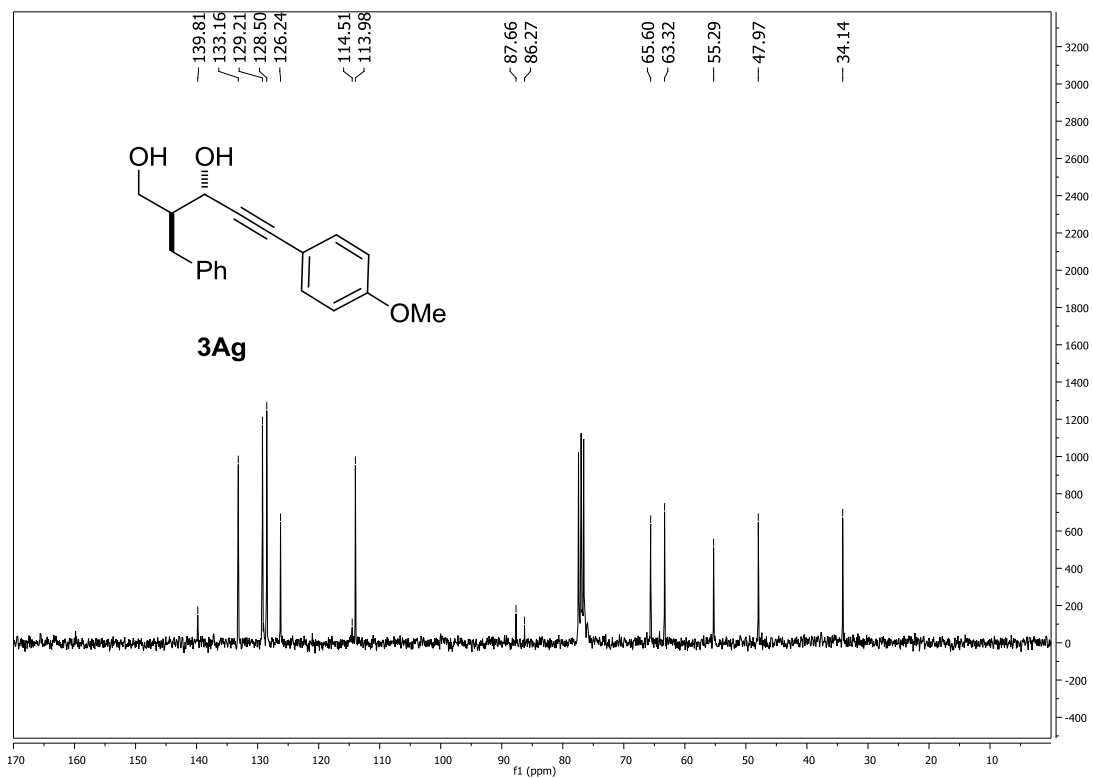

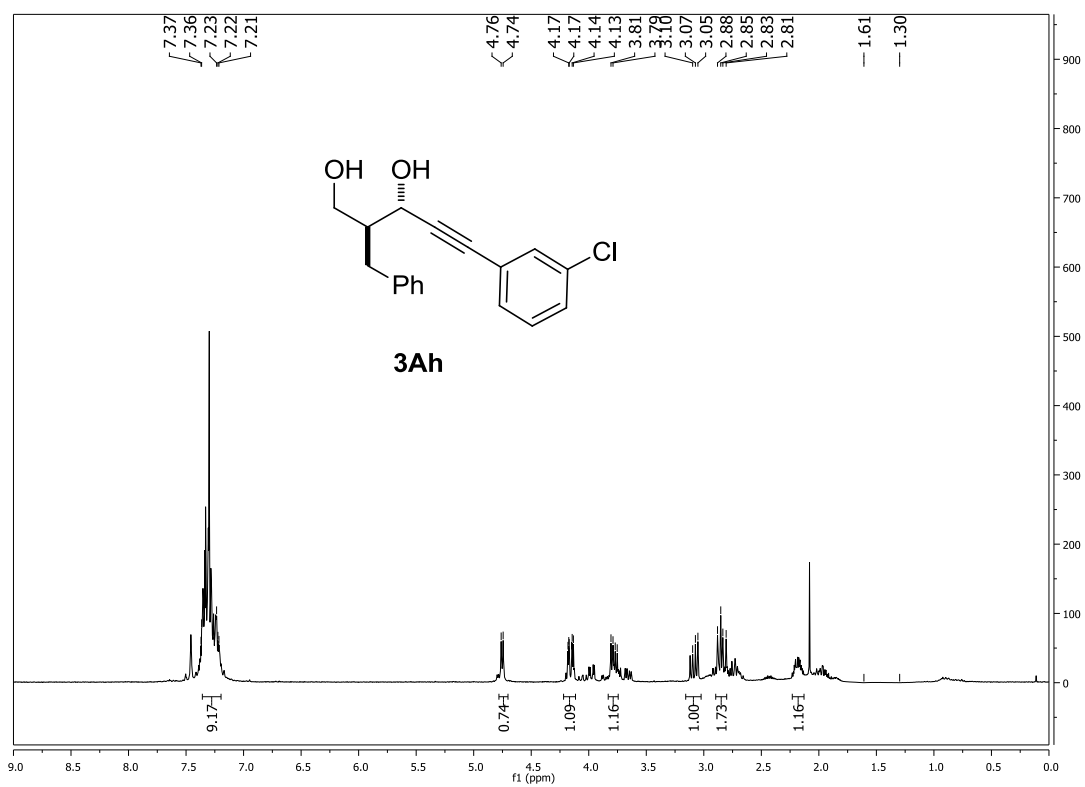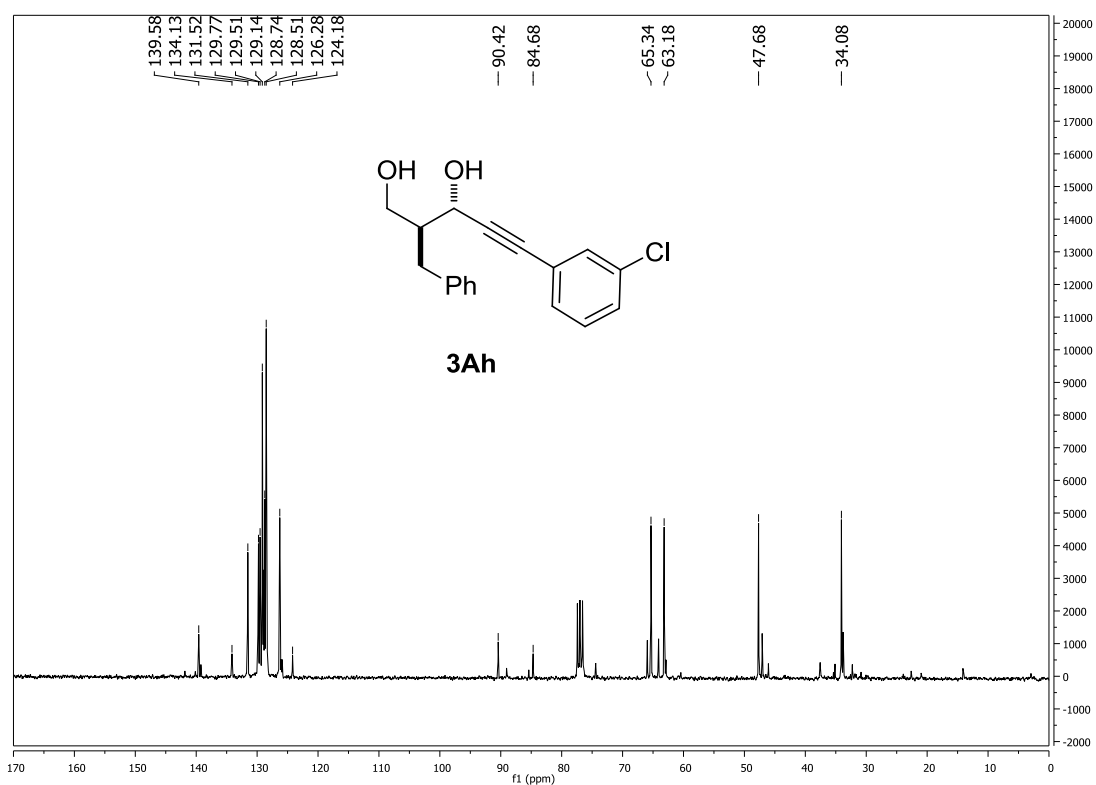

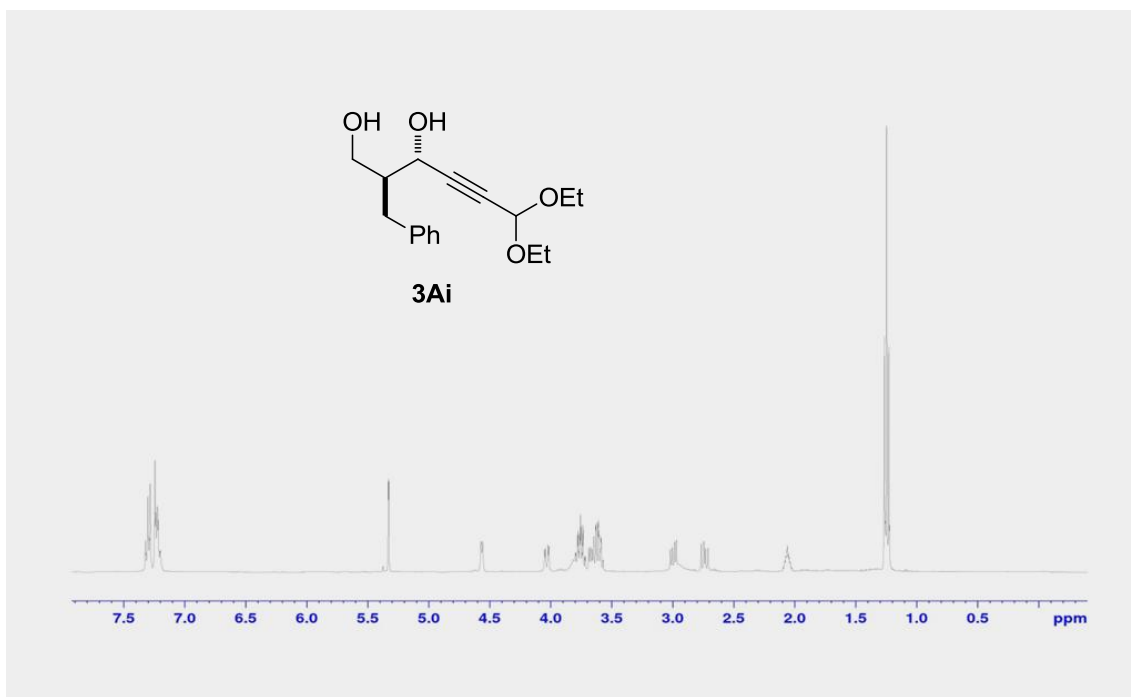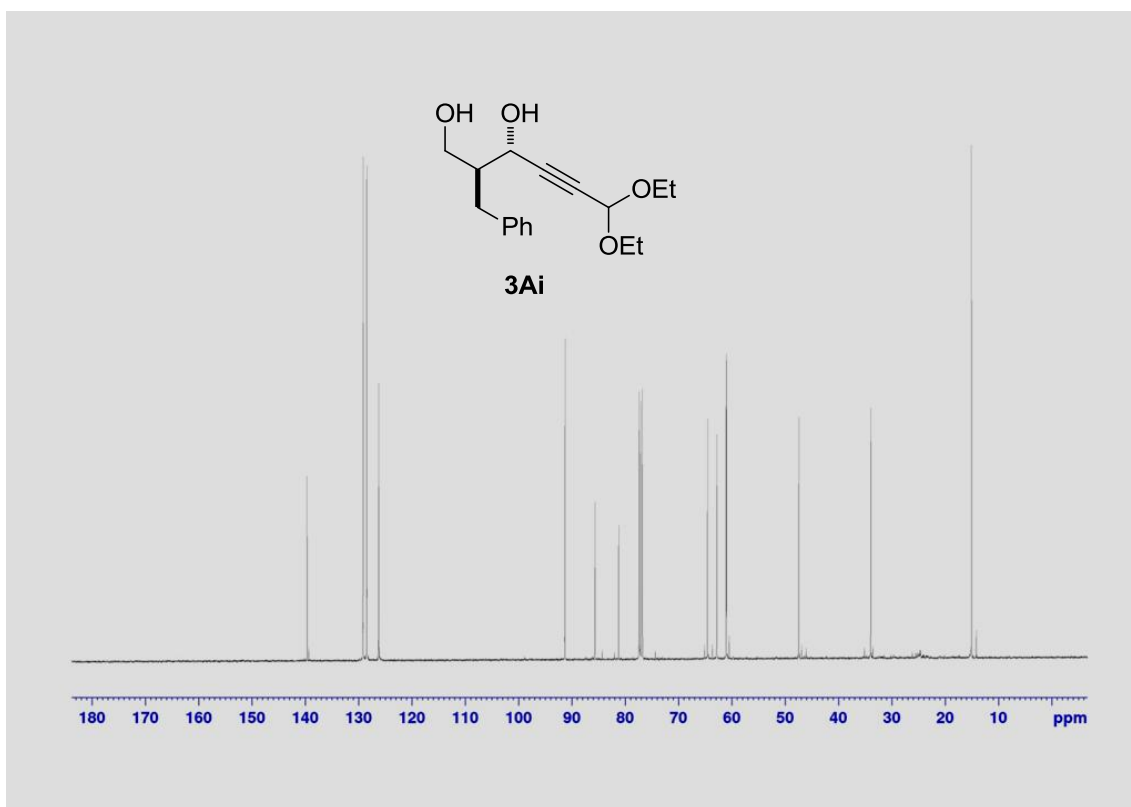

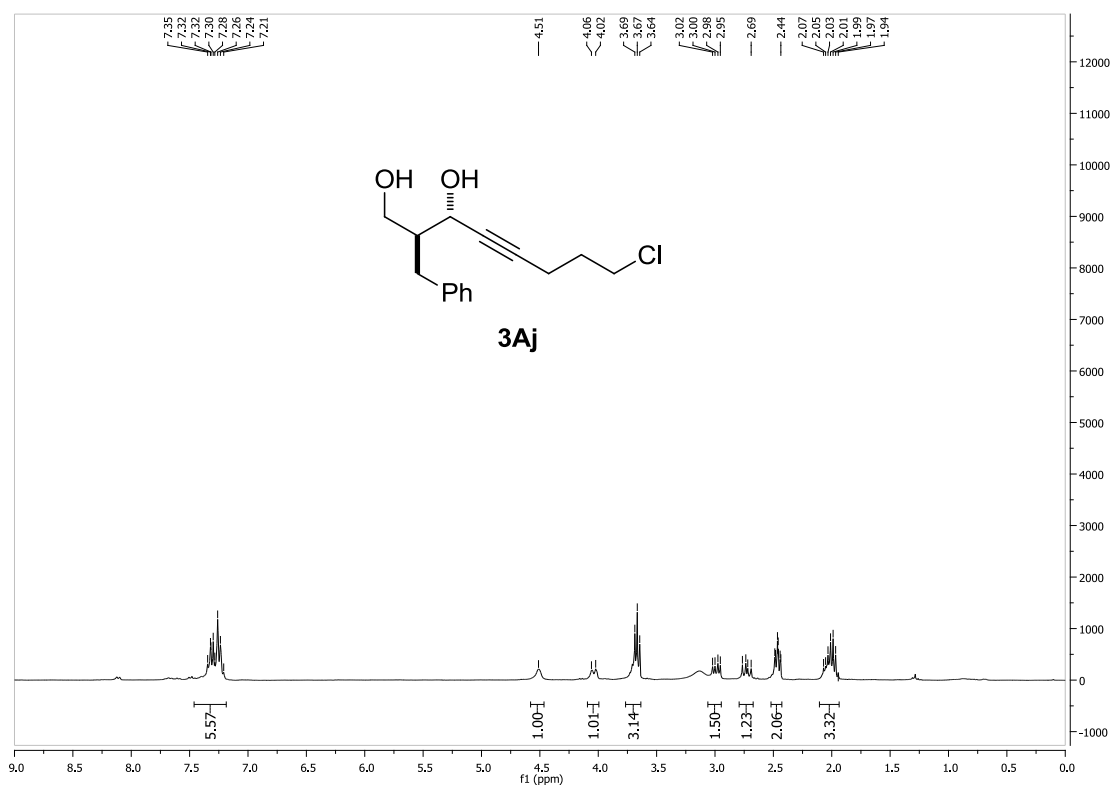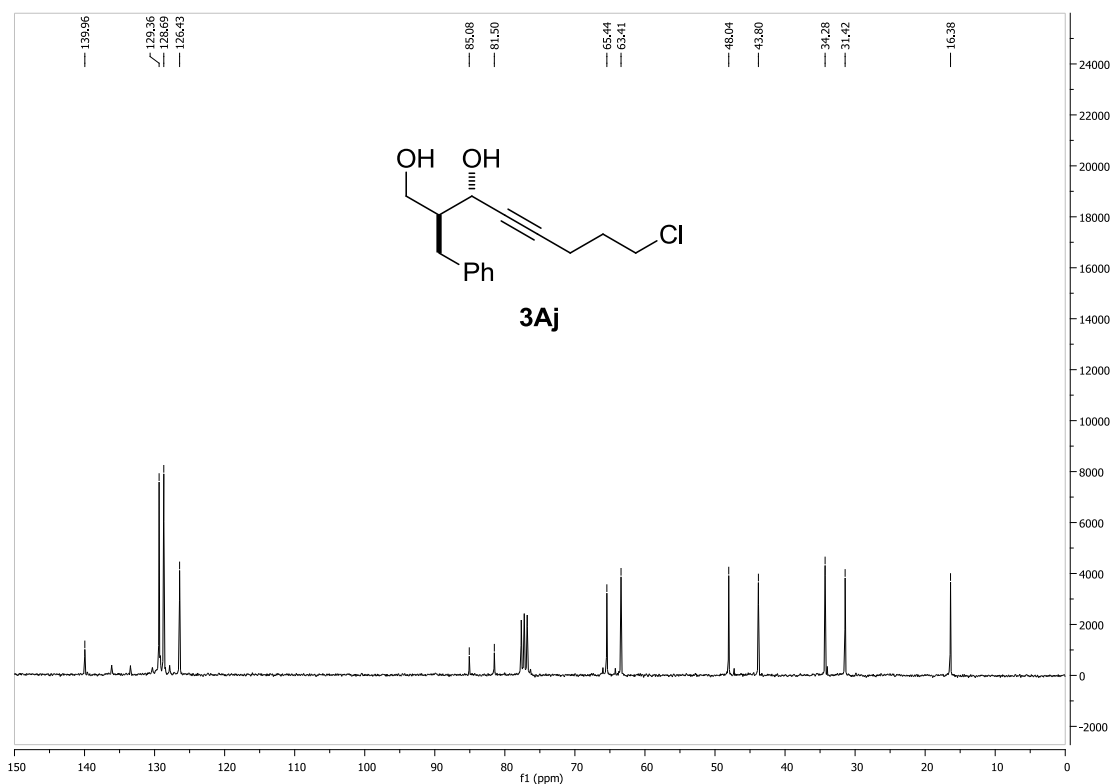

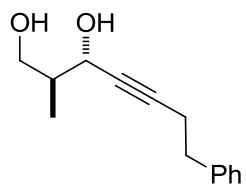

**3Bd**

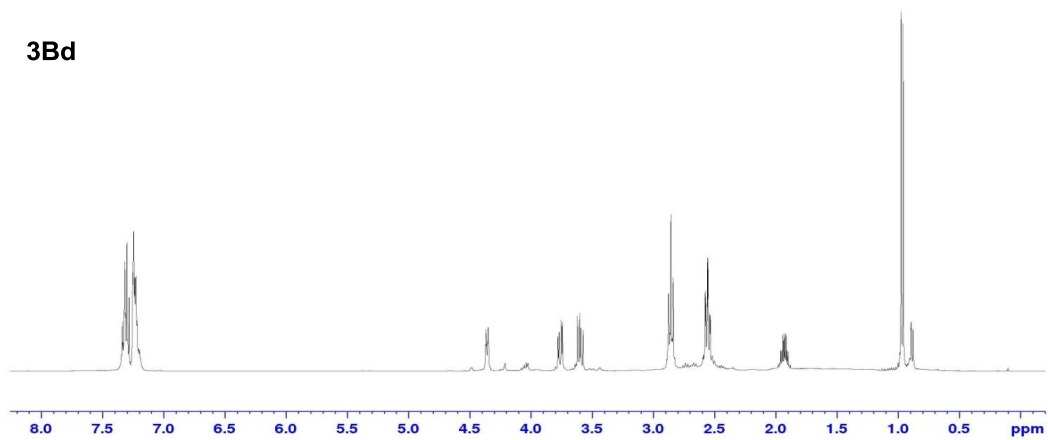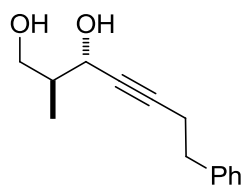

**3Bd**

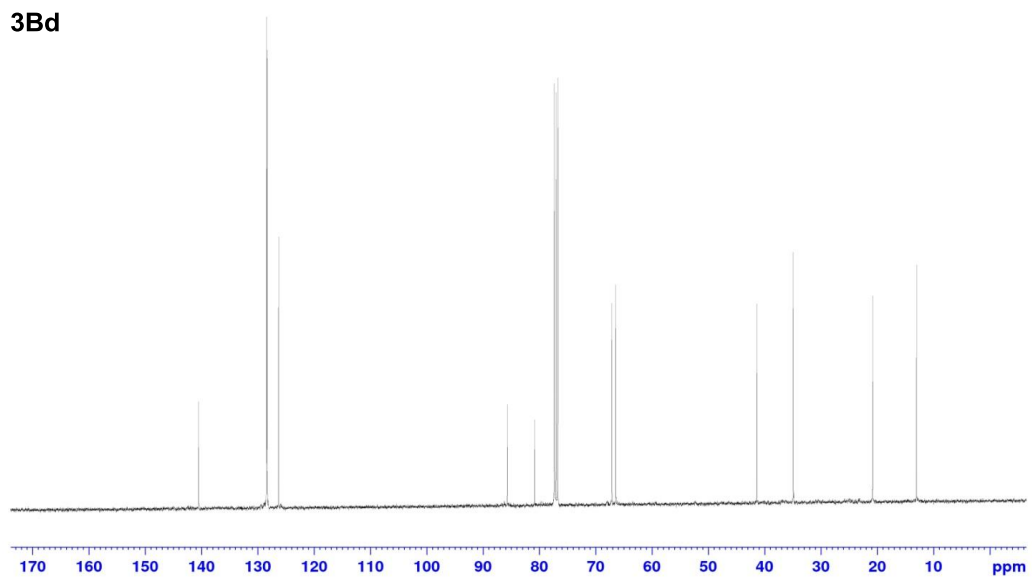

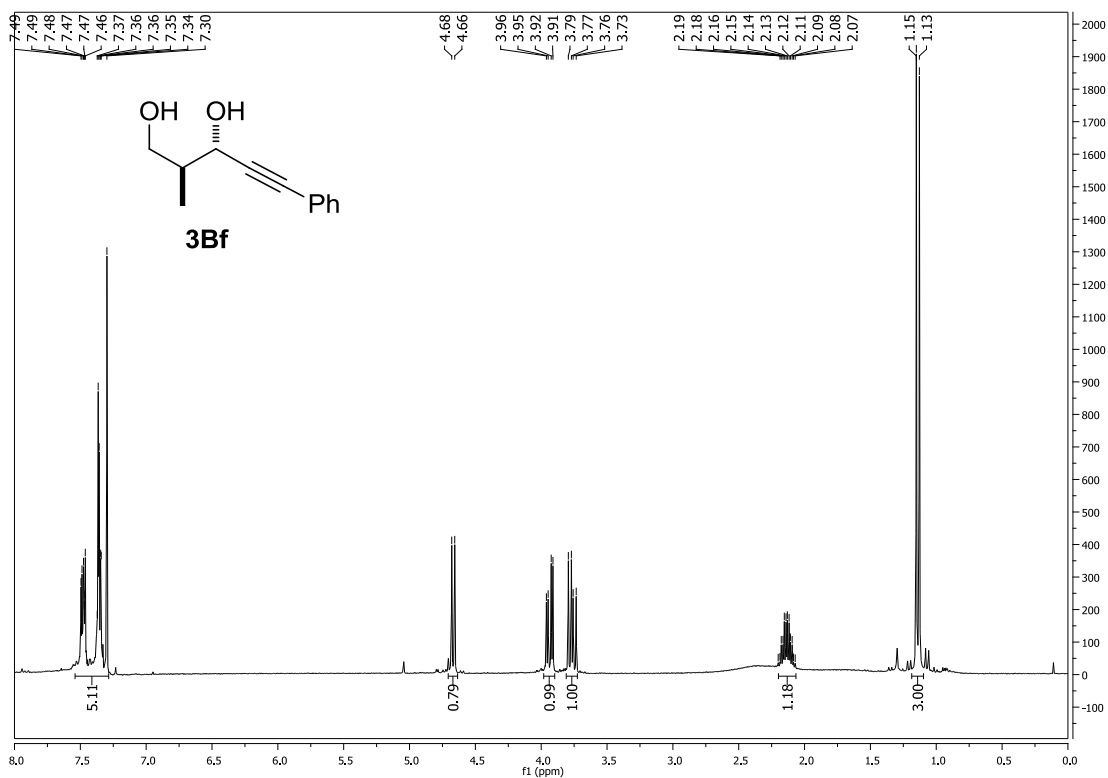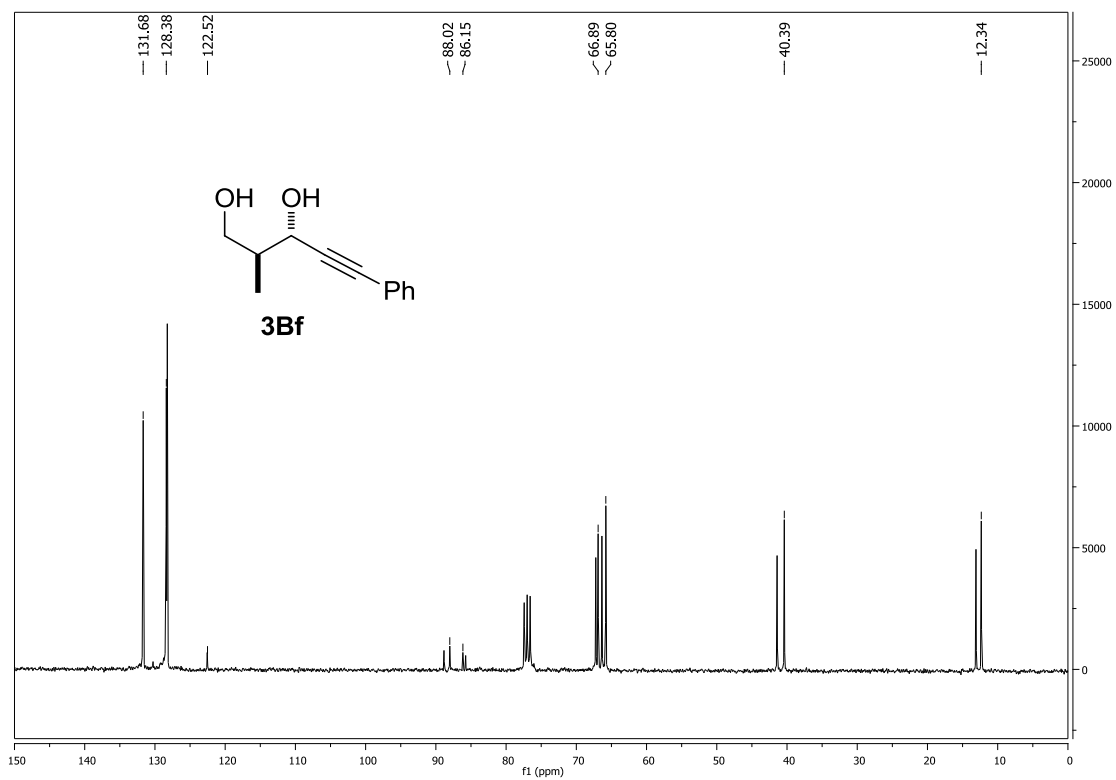

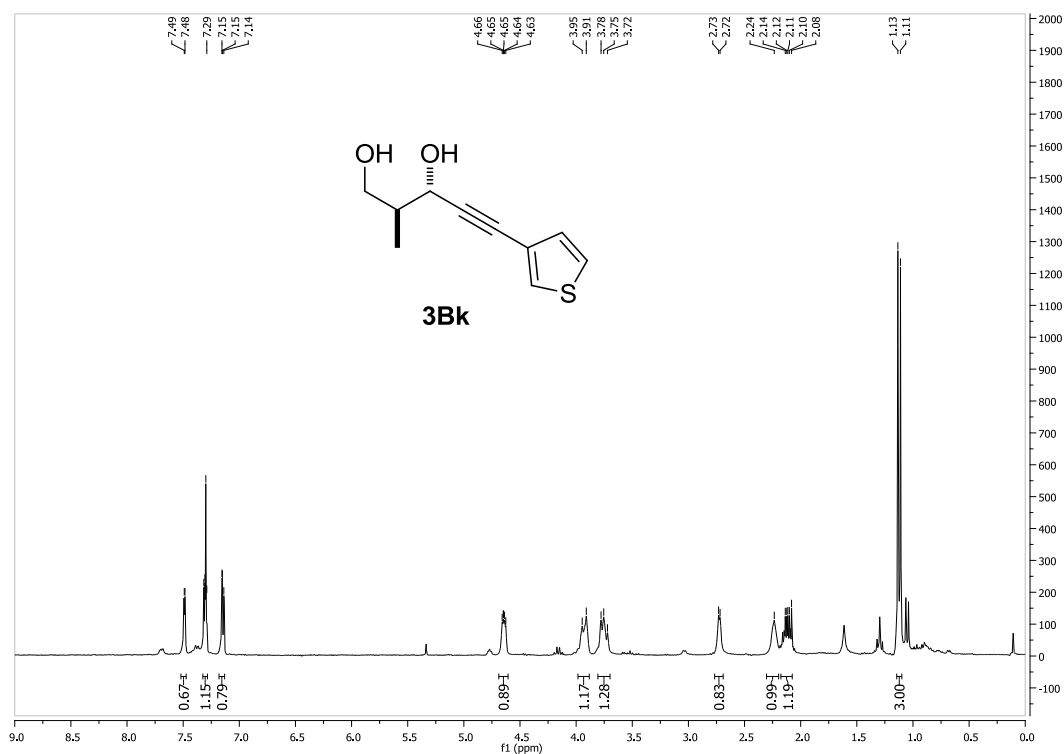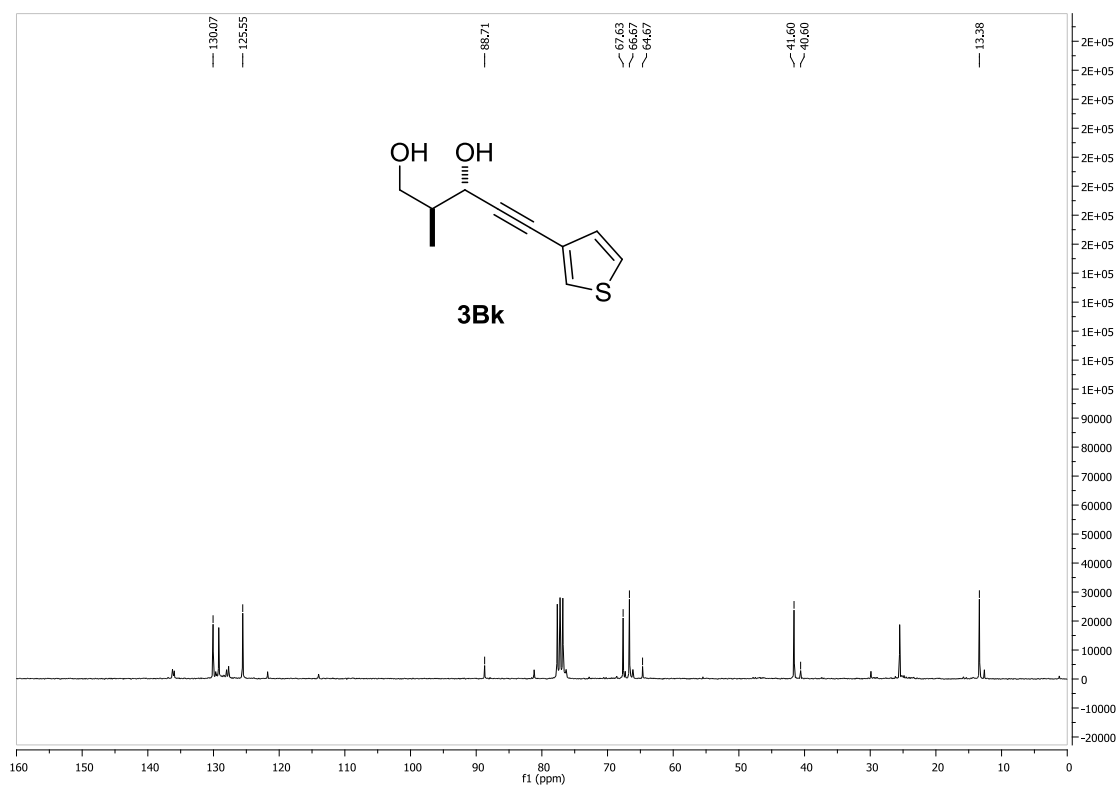



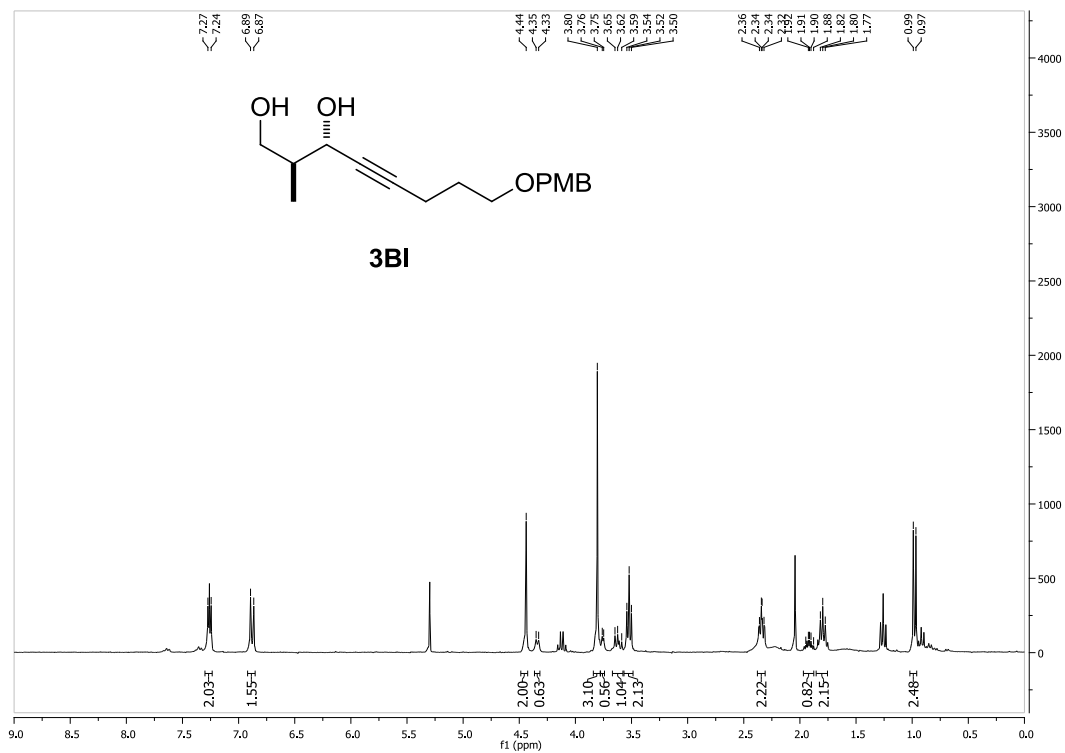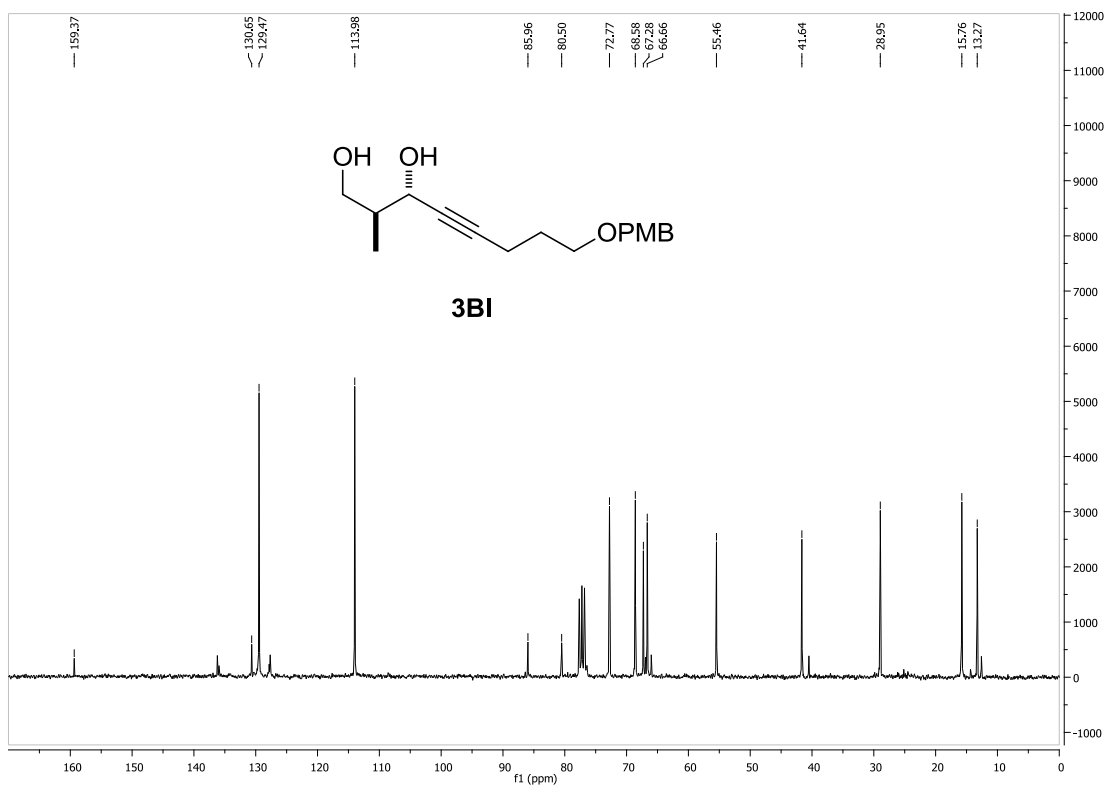

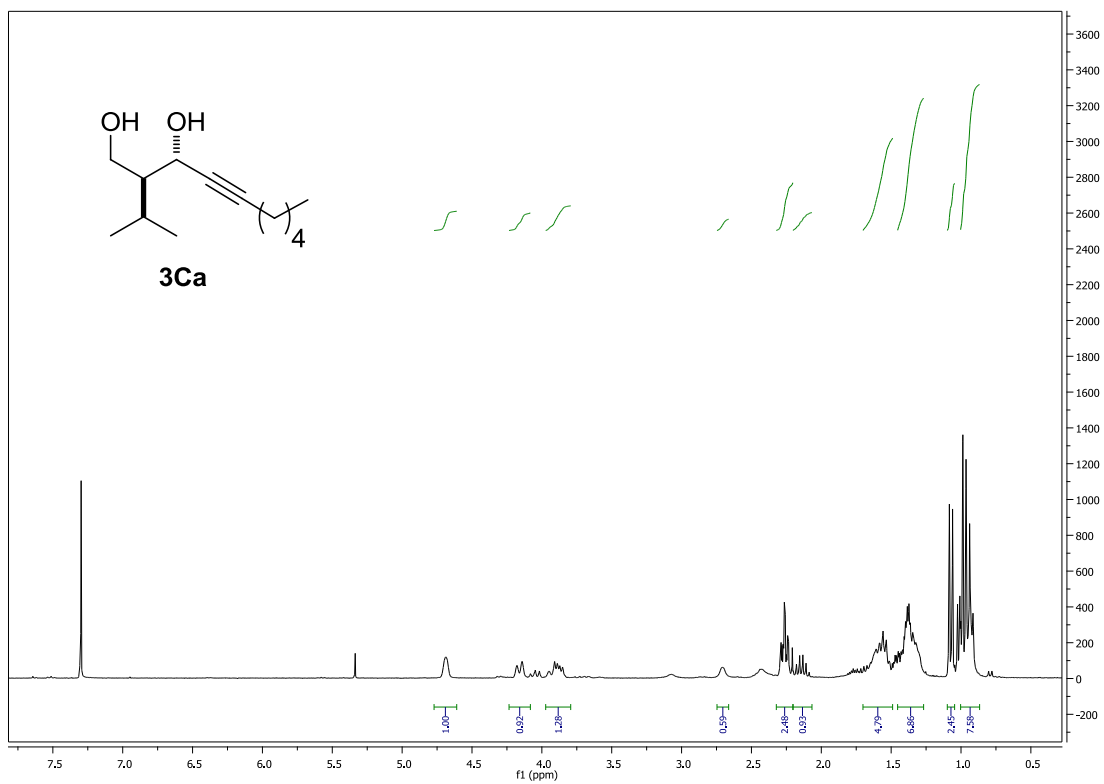

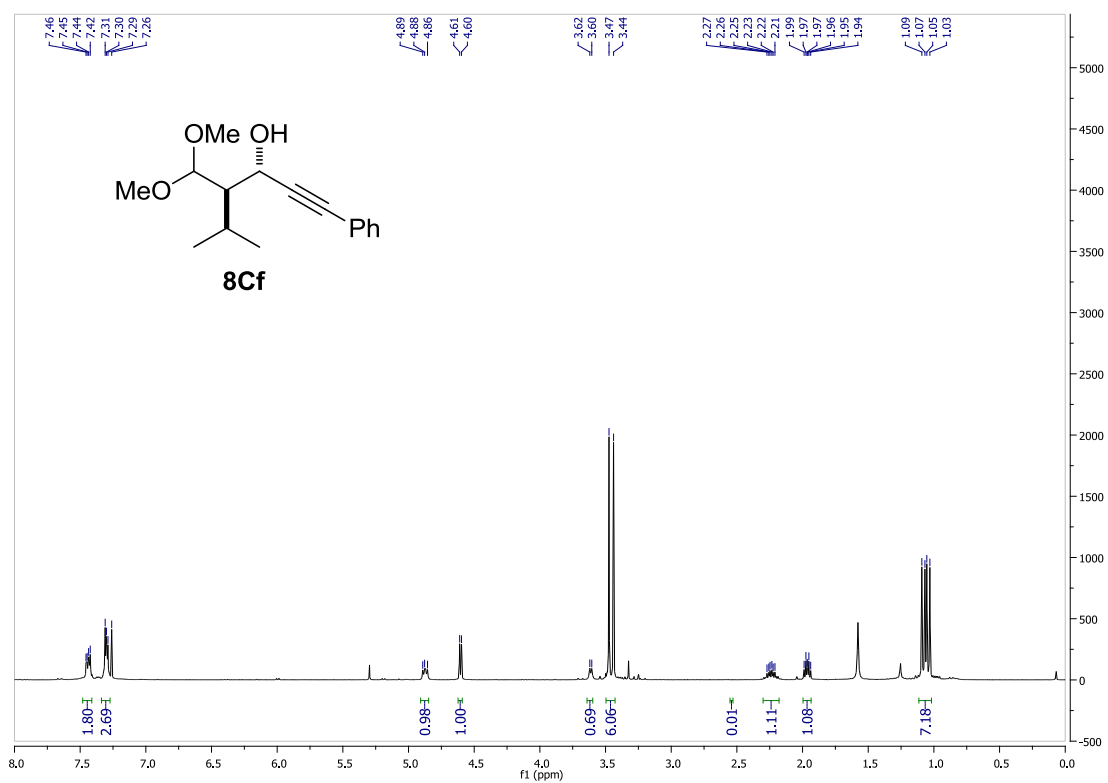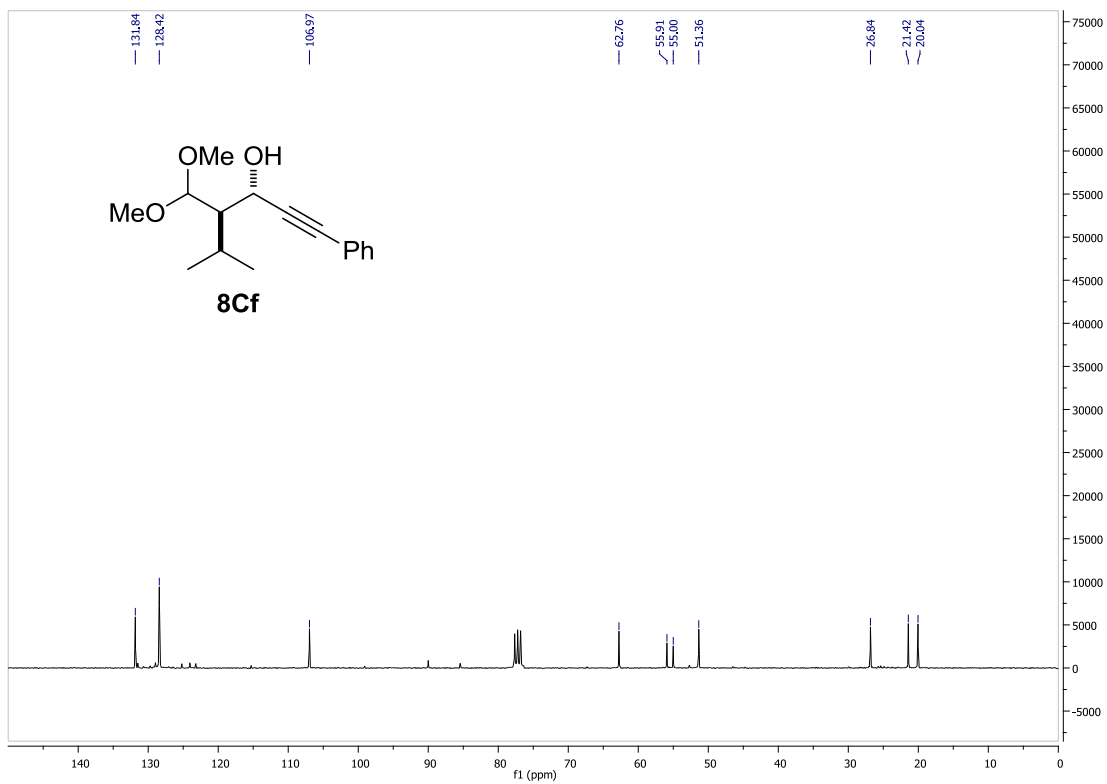

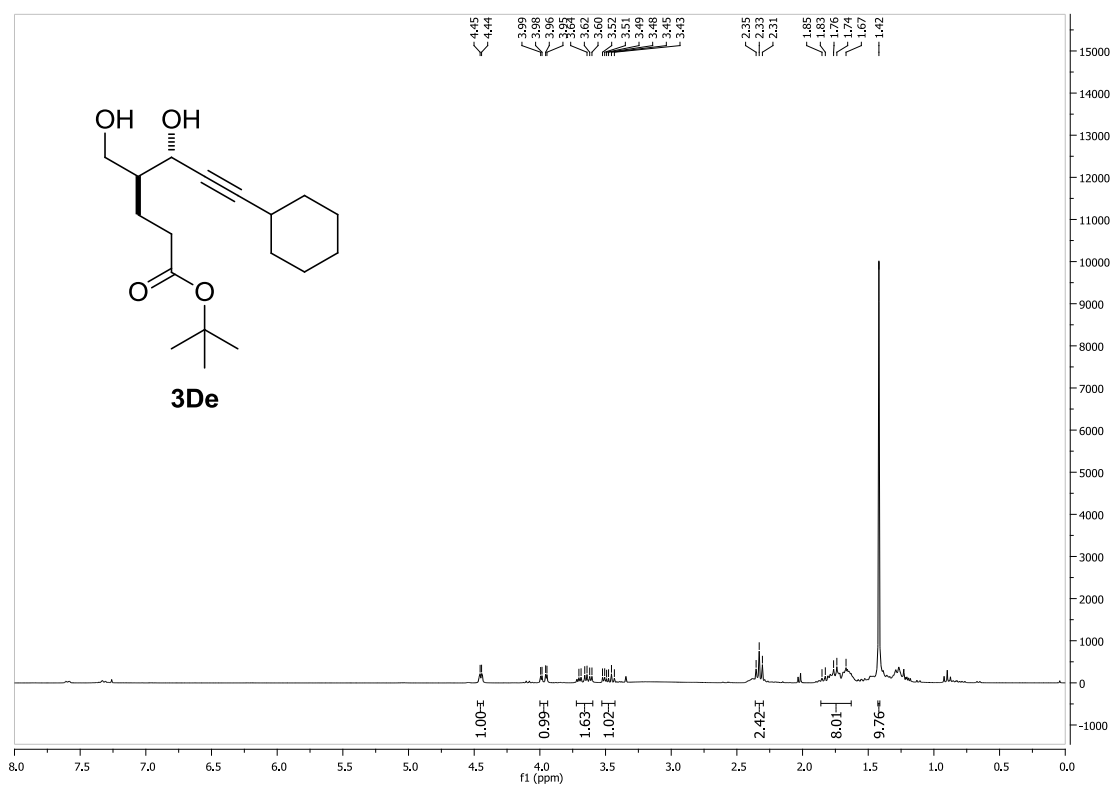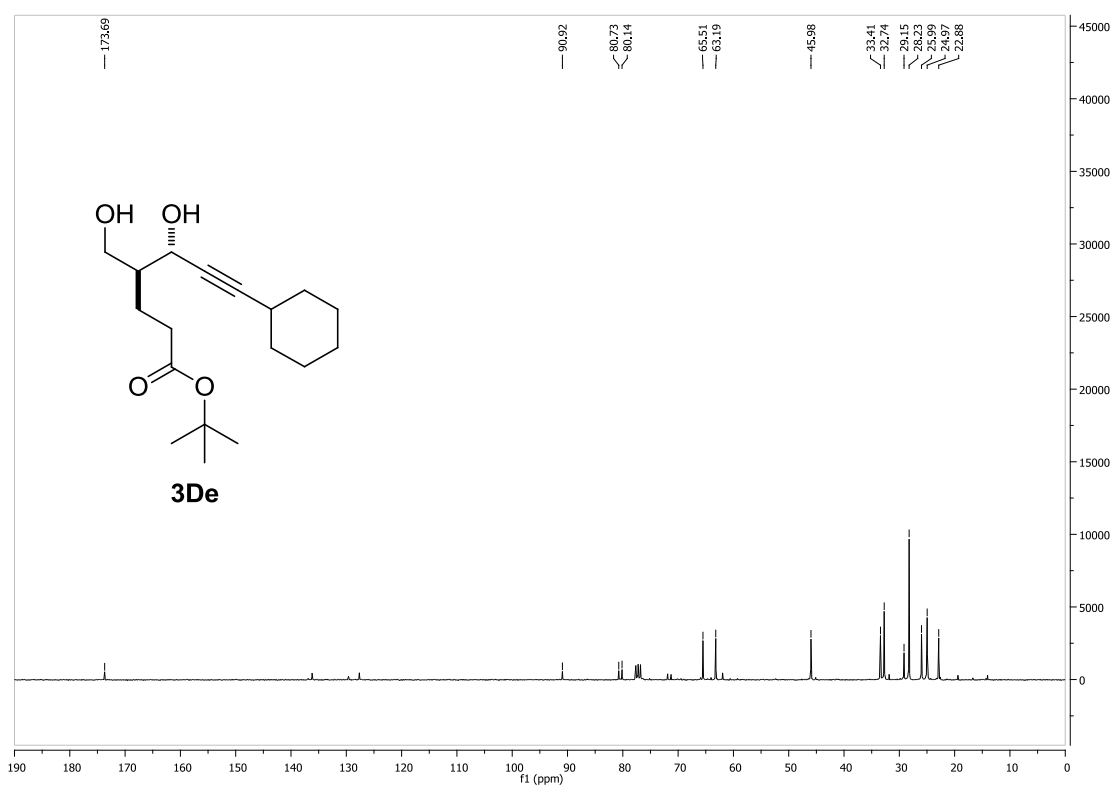

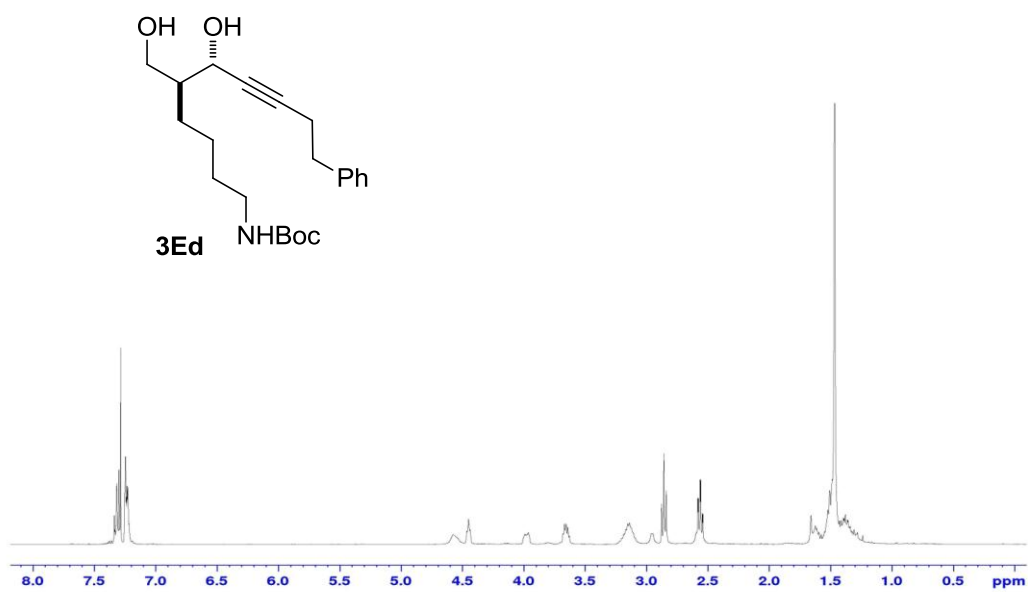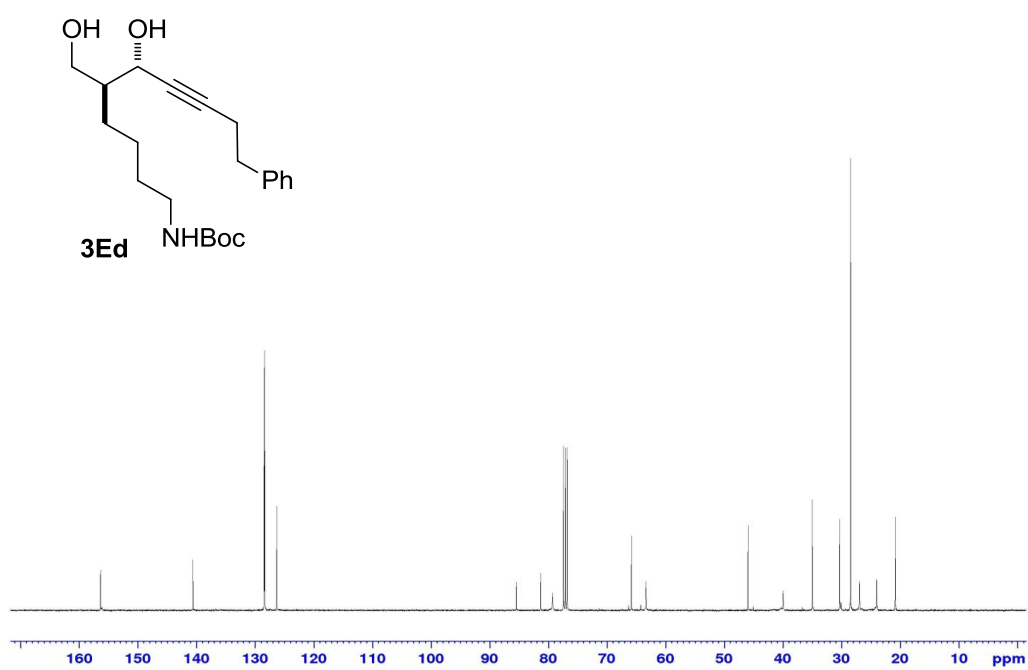

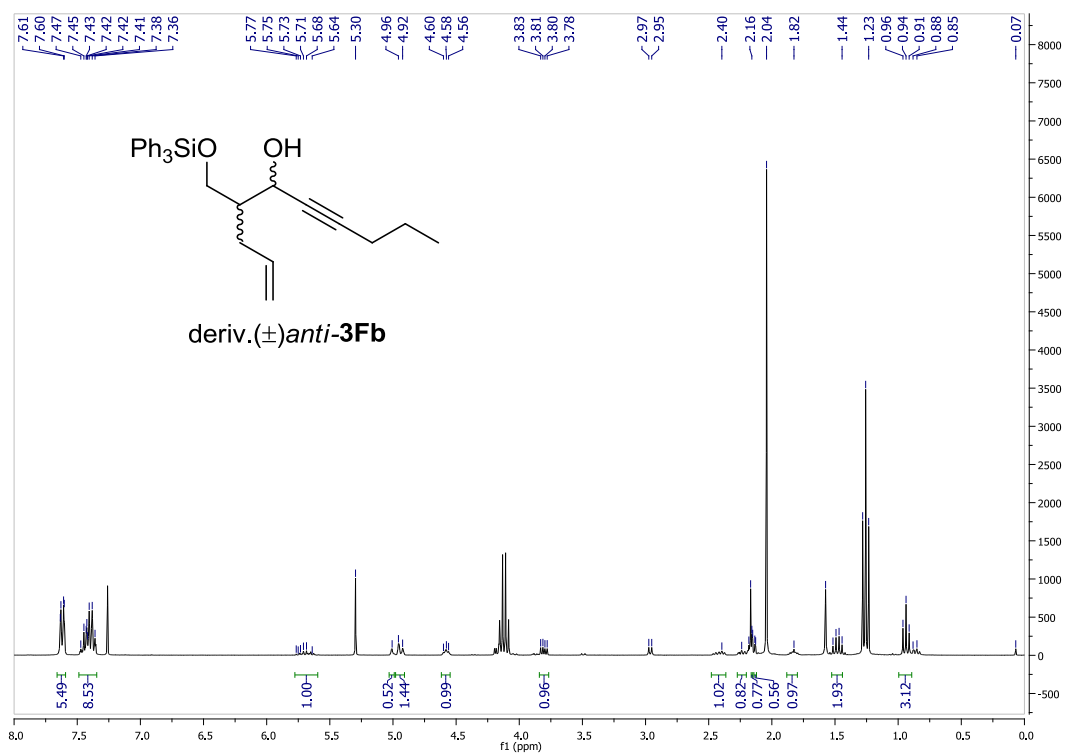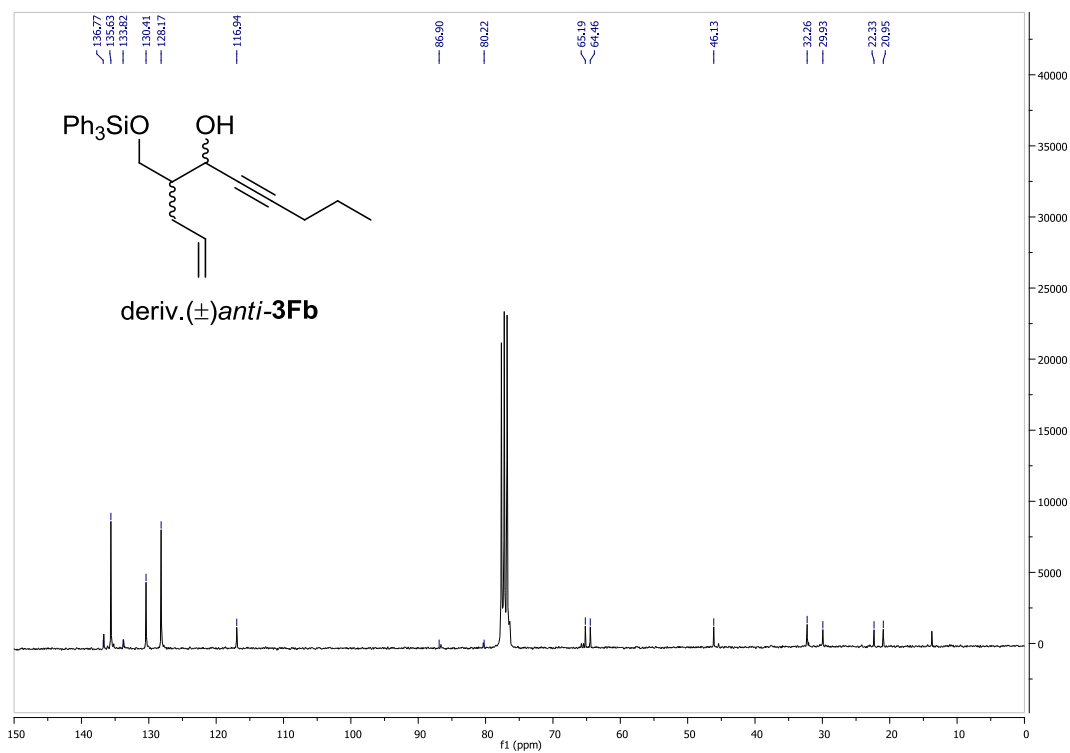

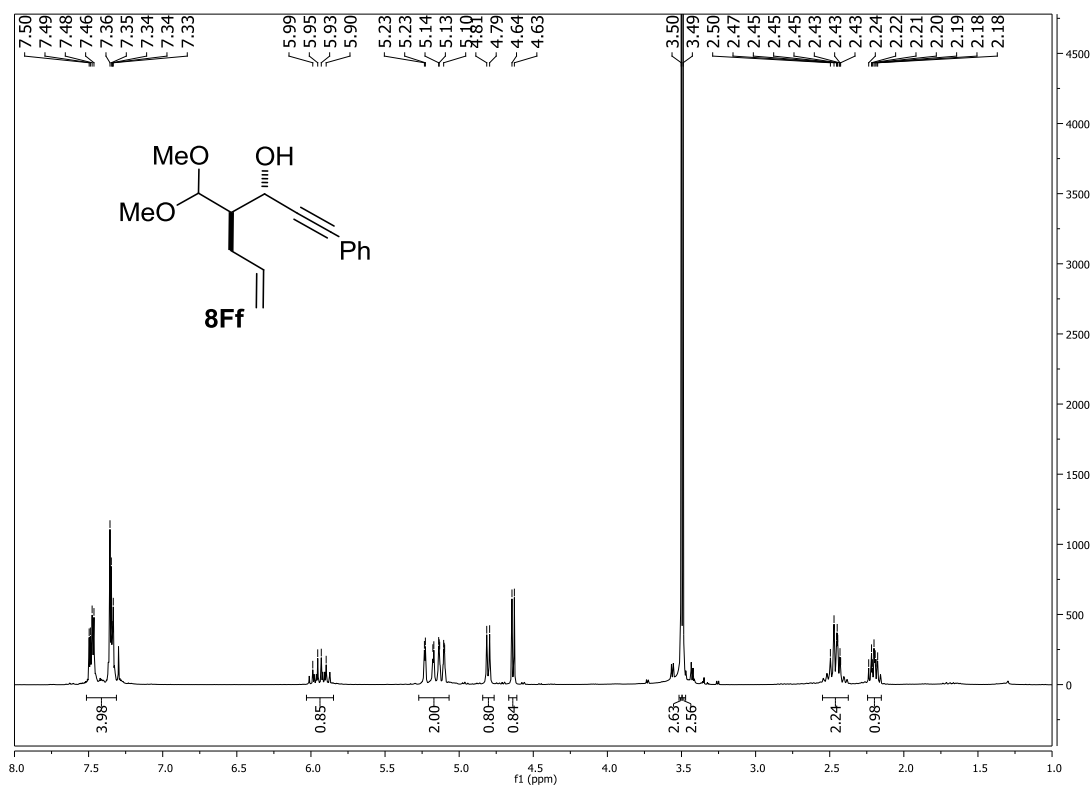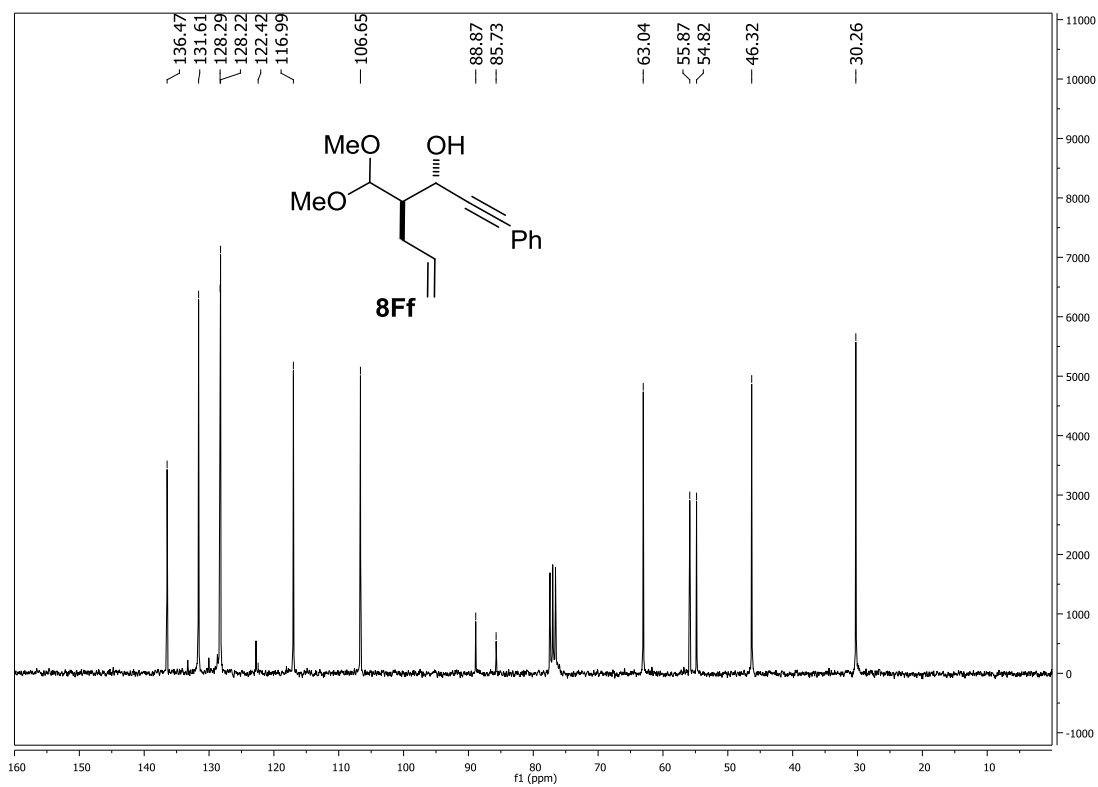

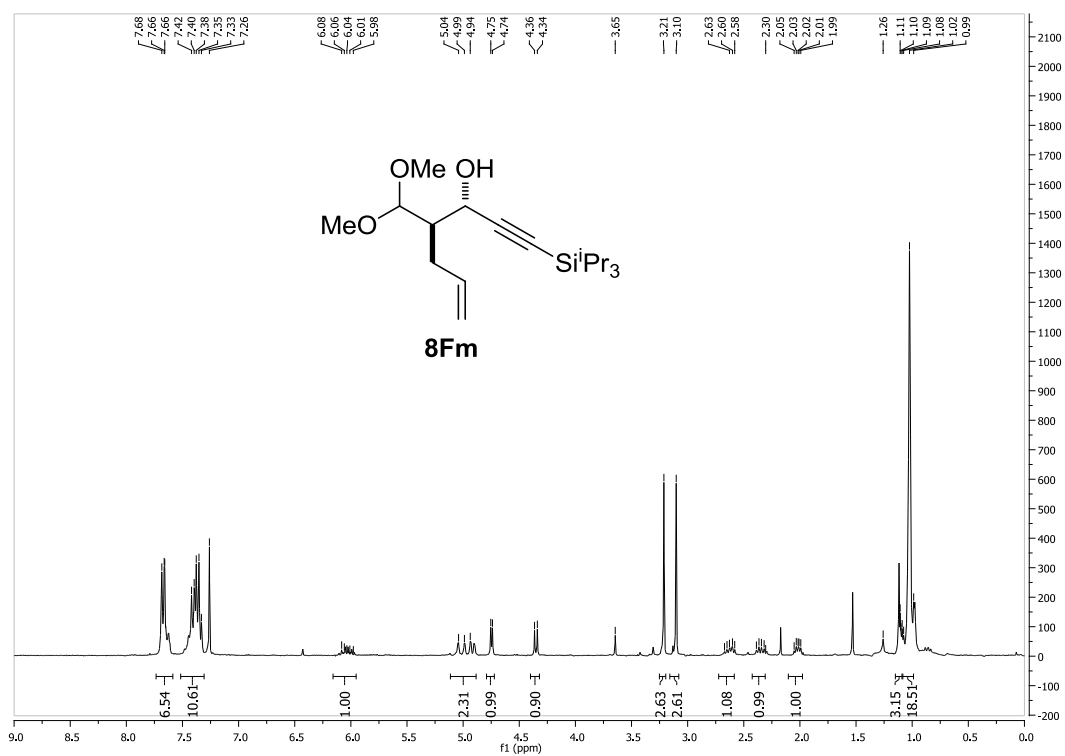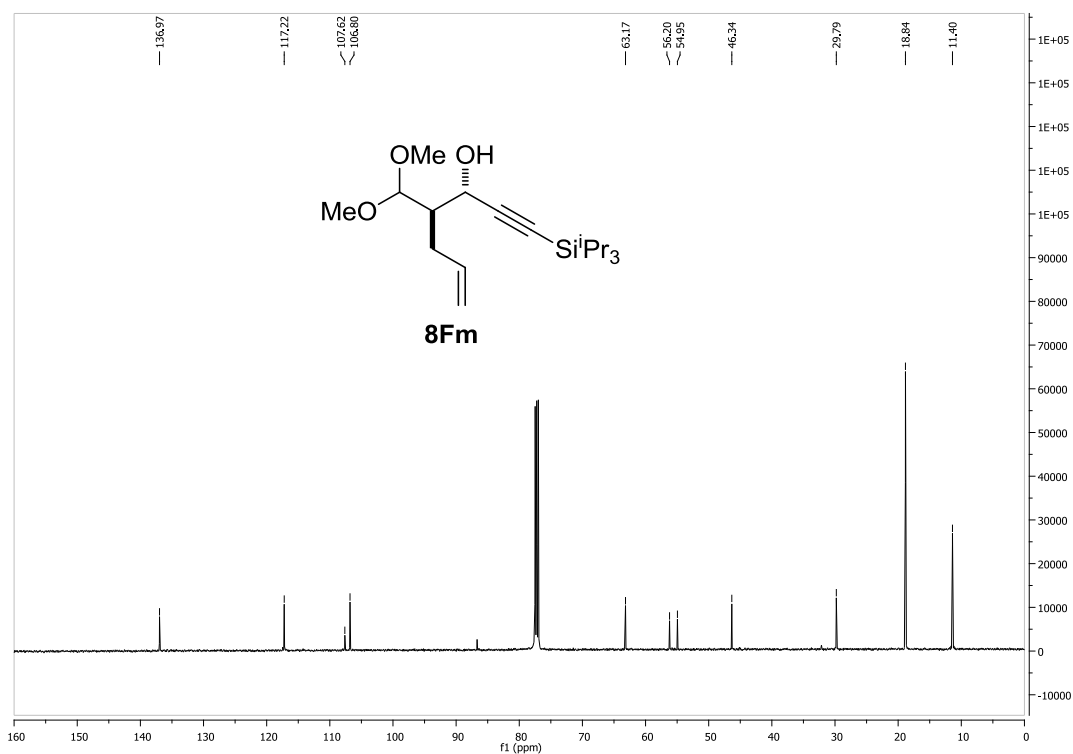



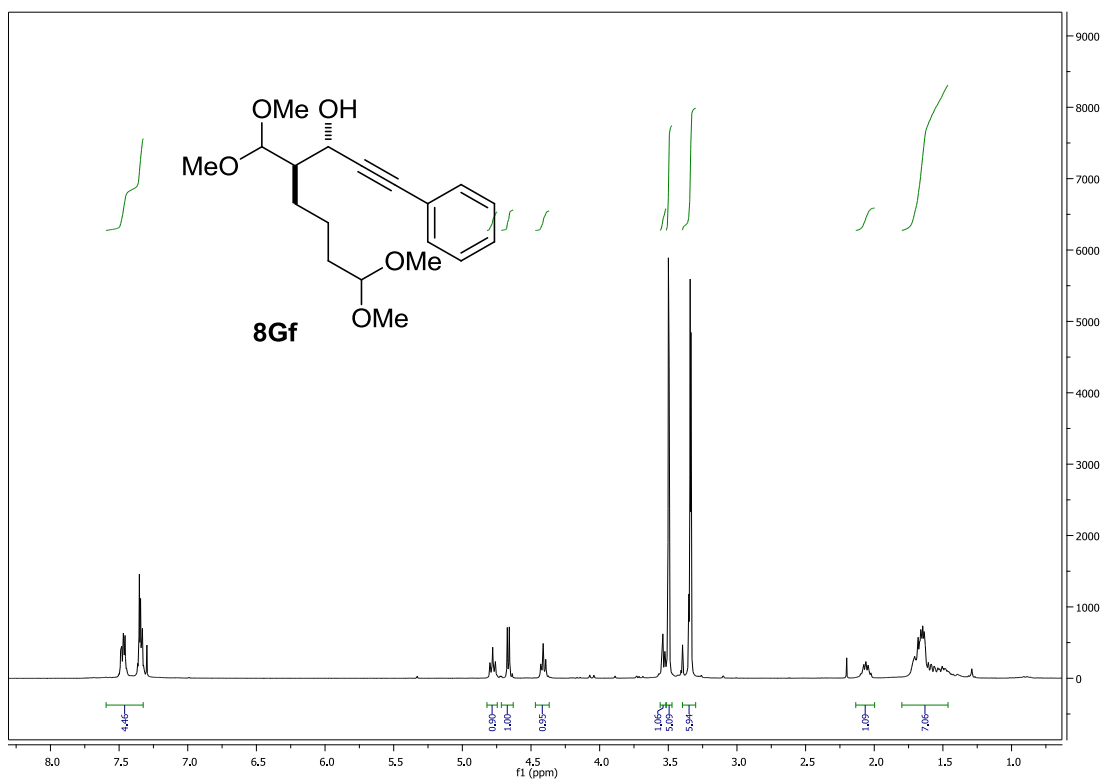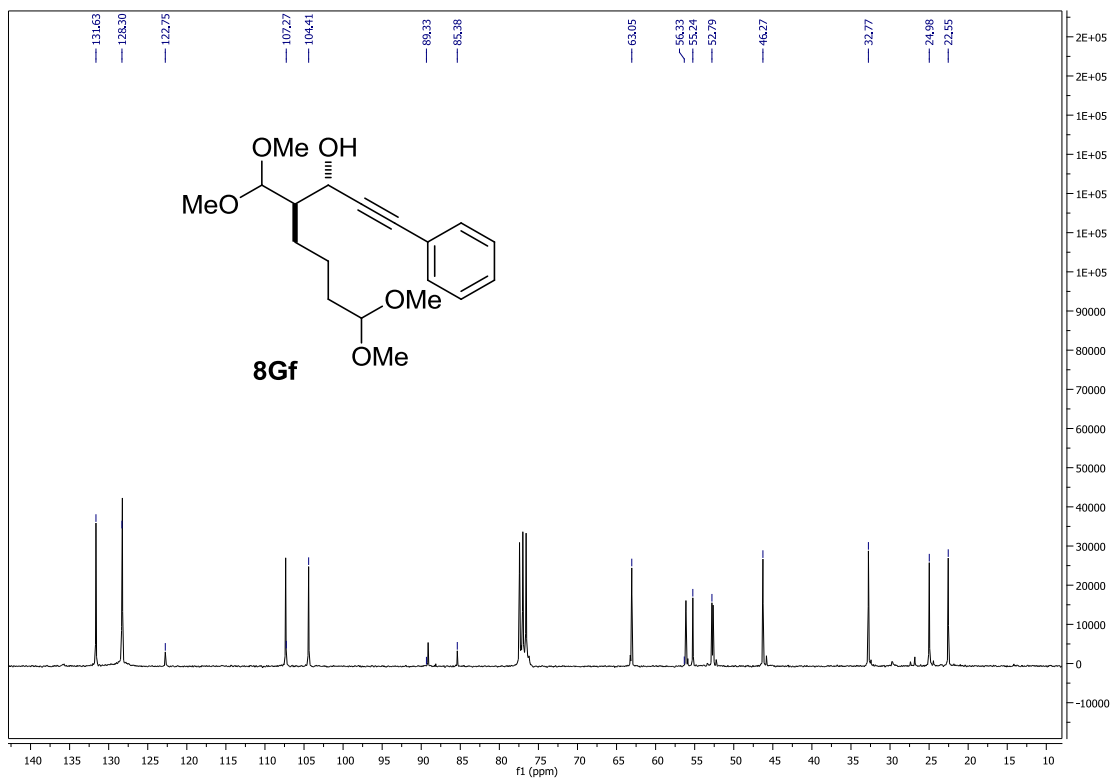

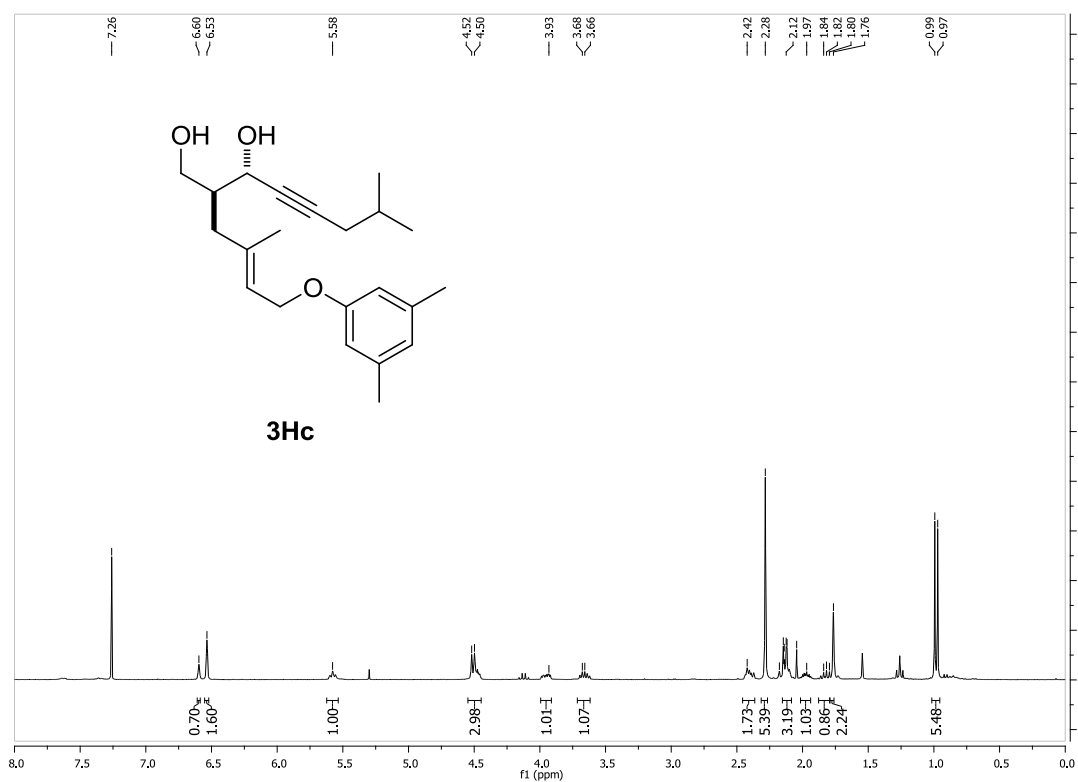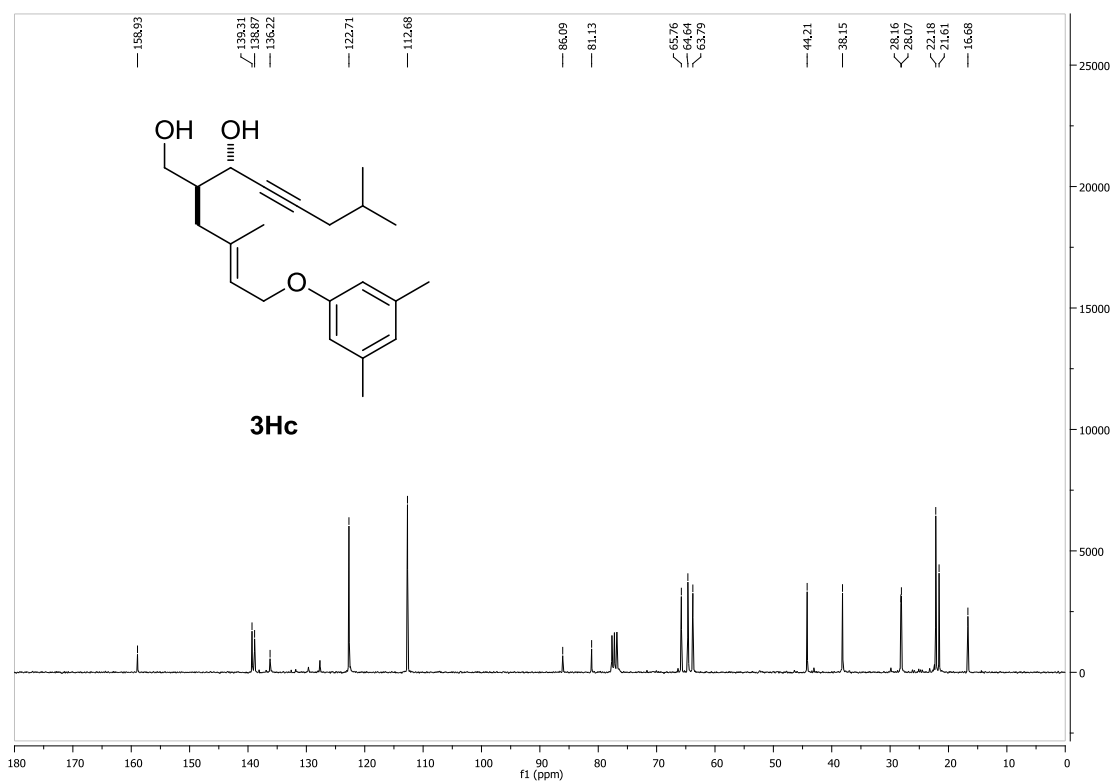

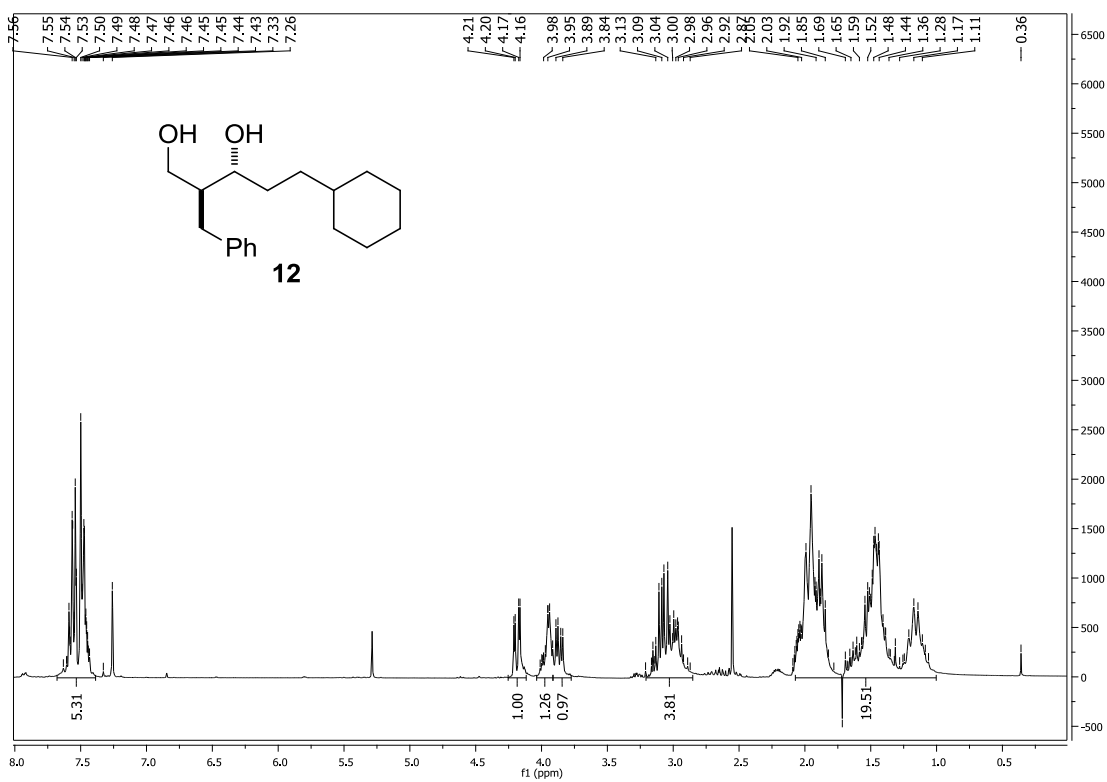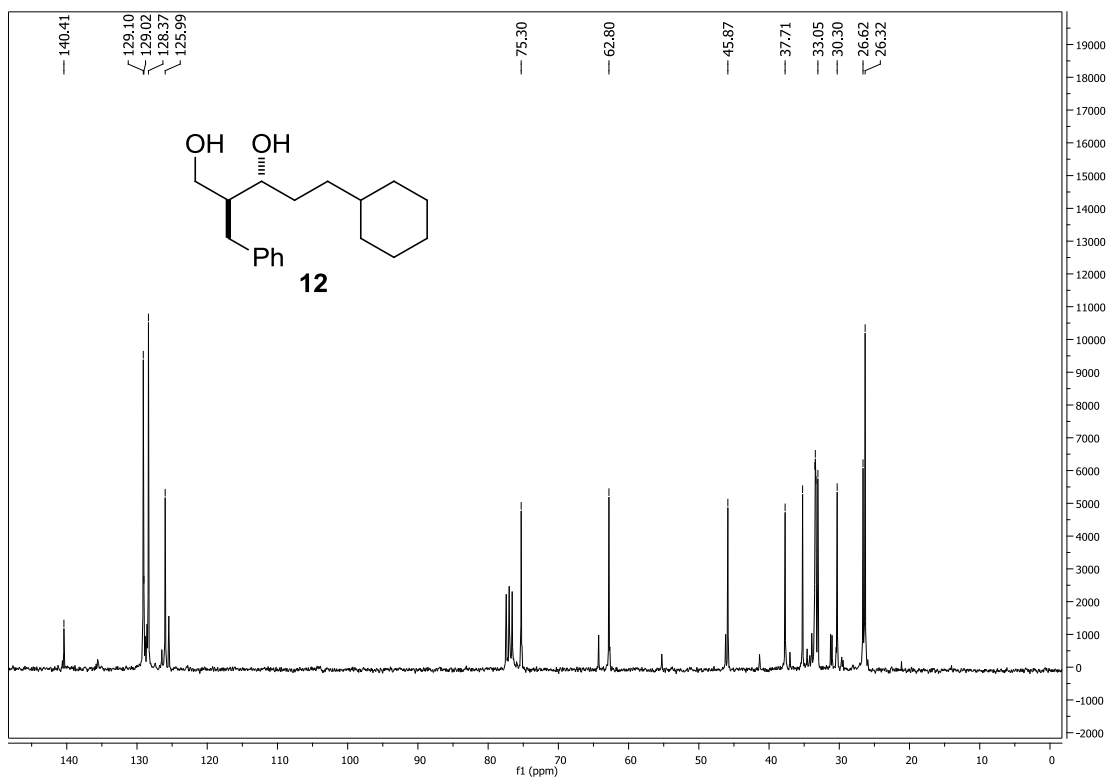

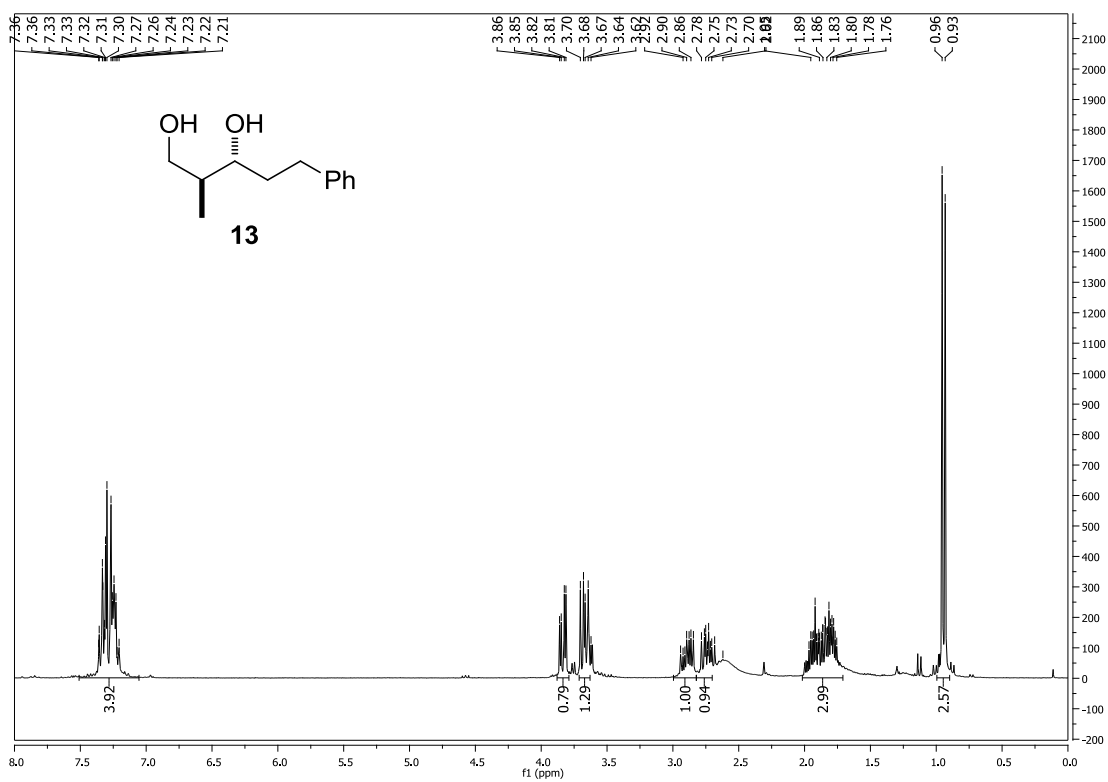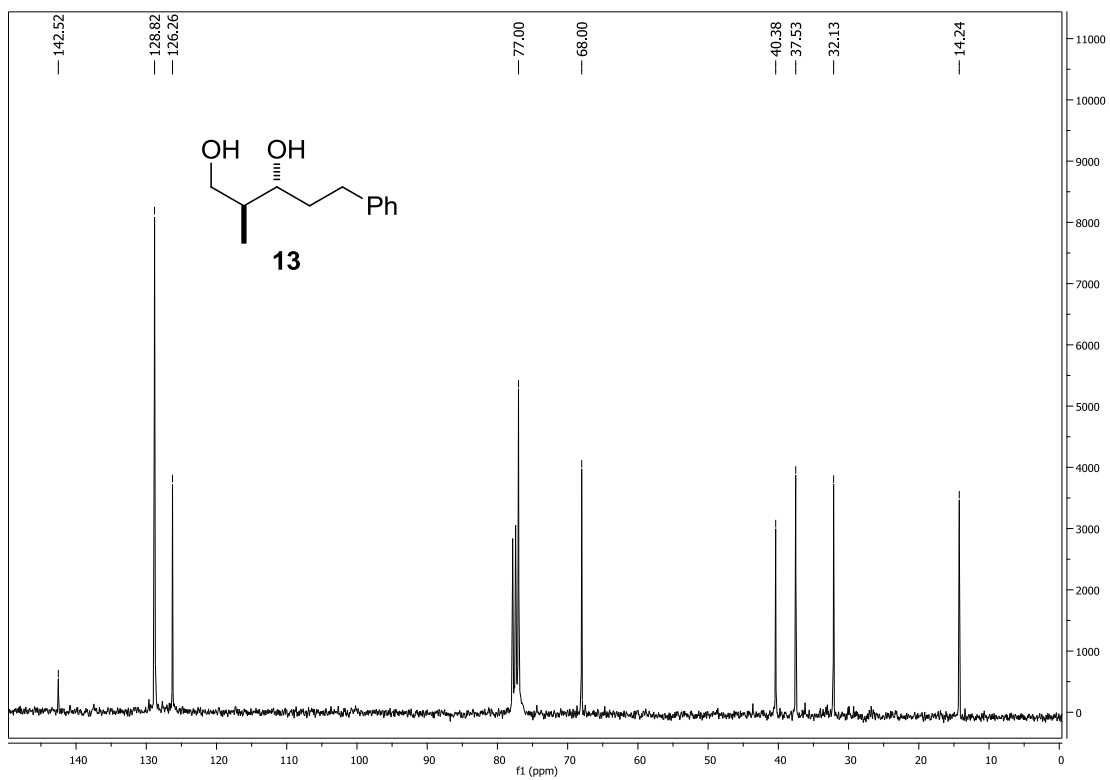

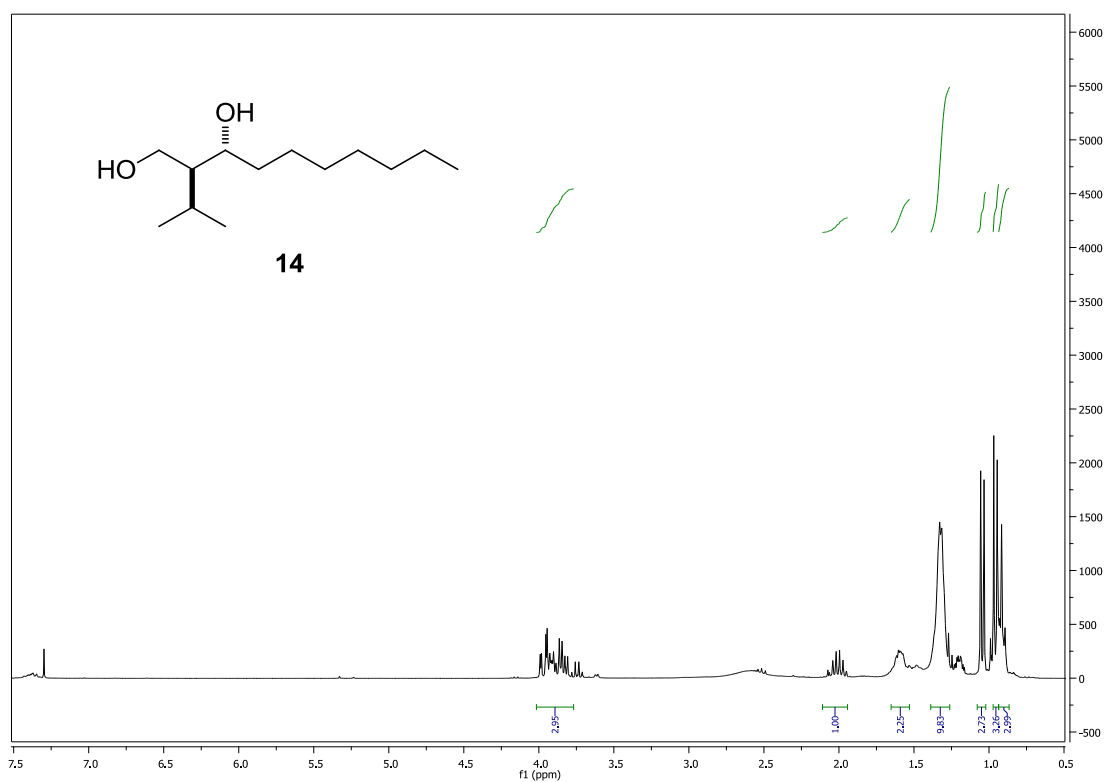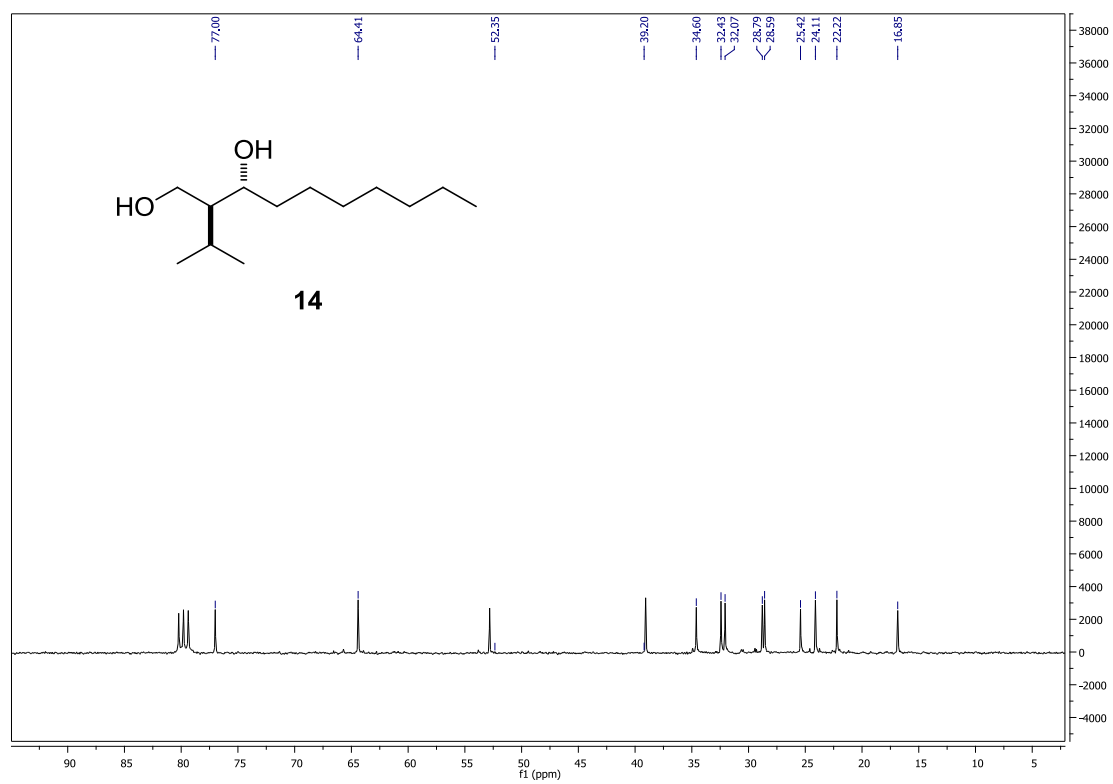

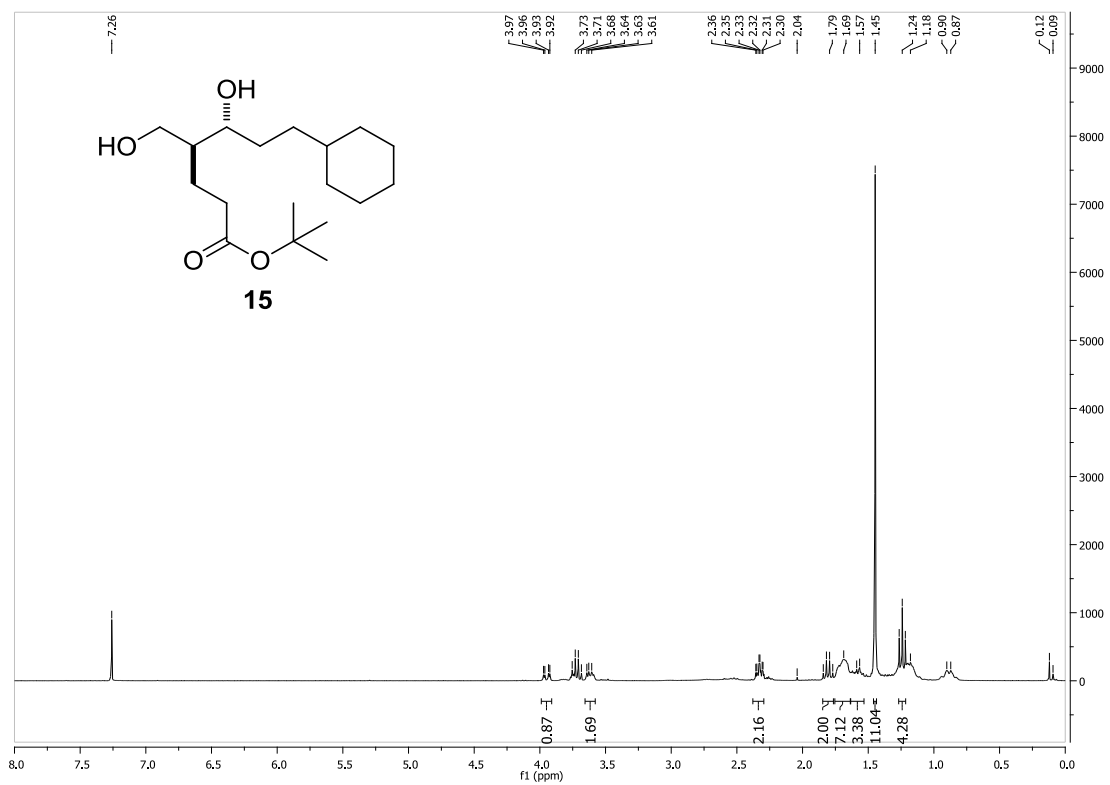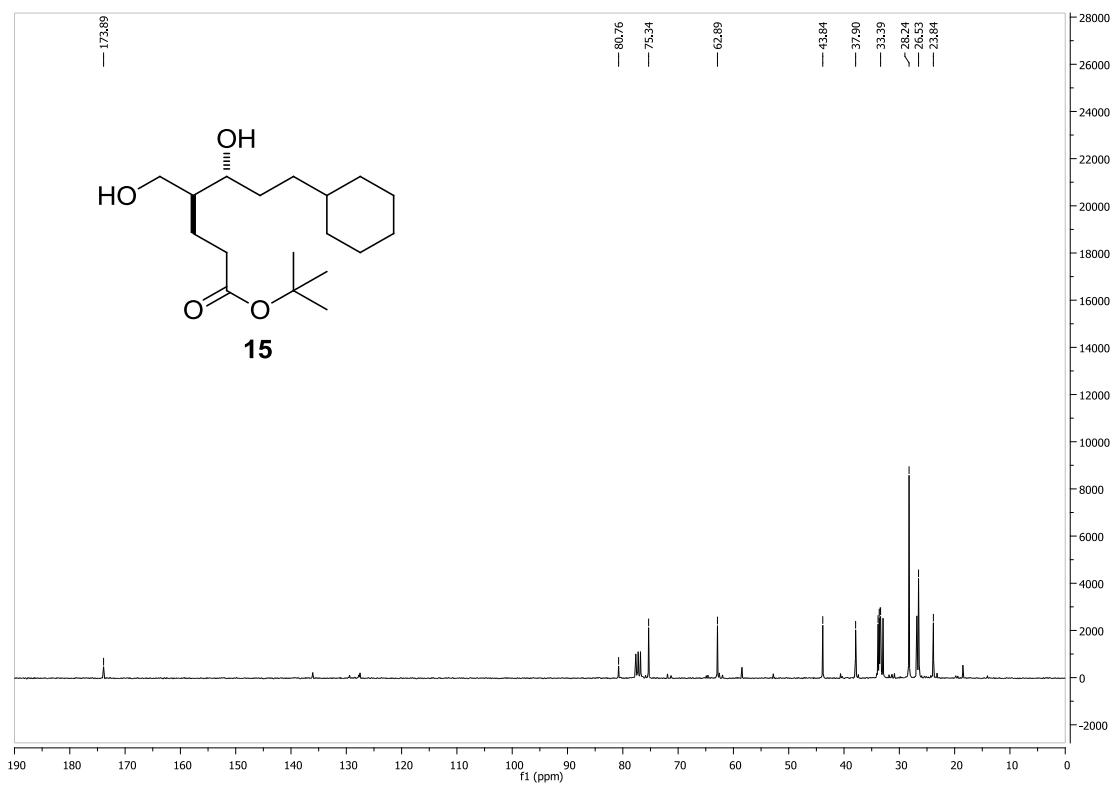

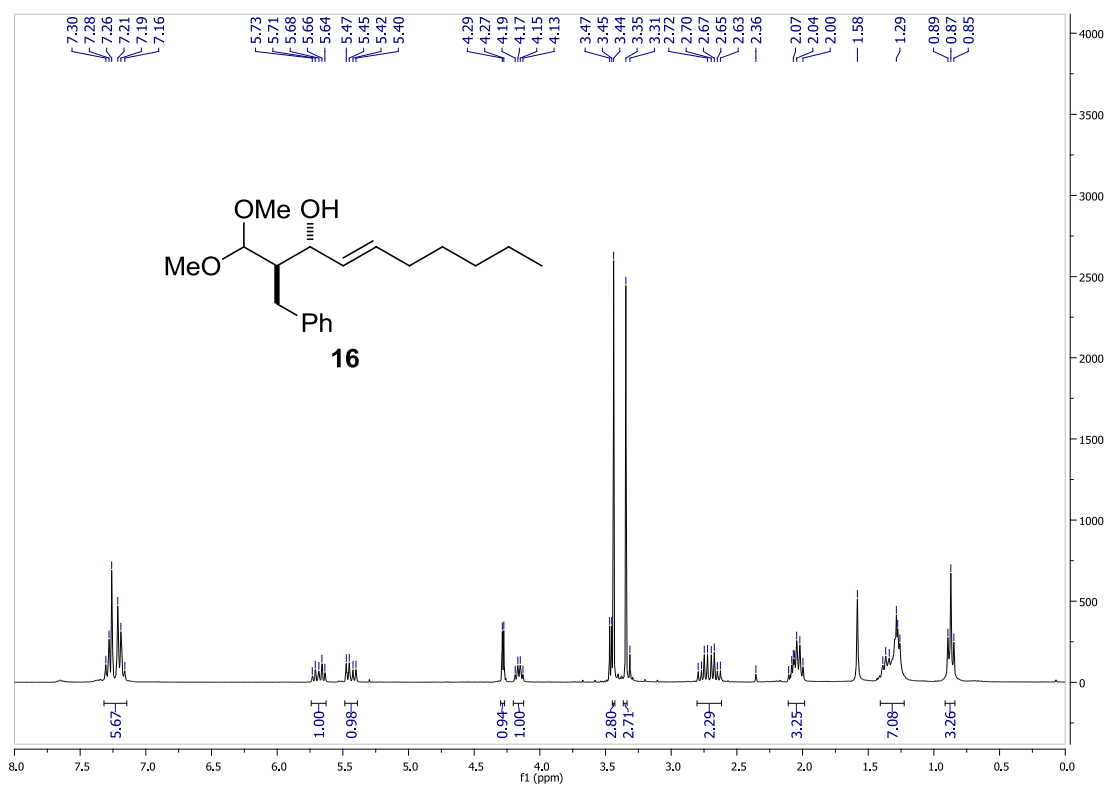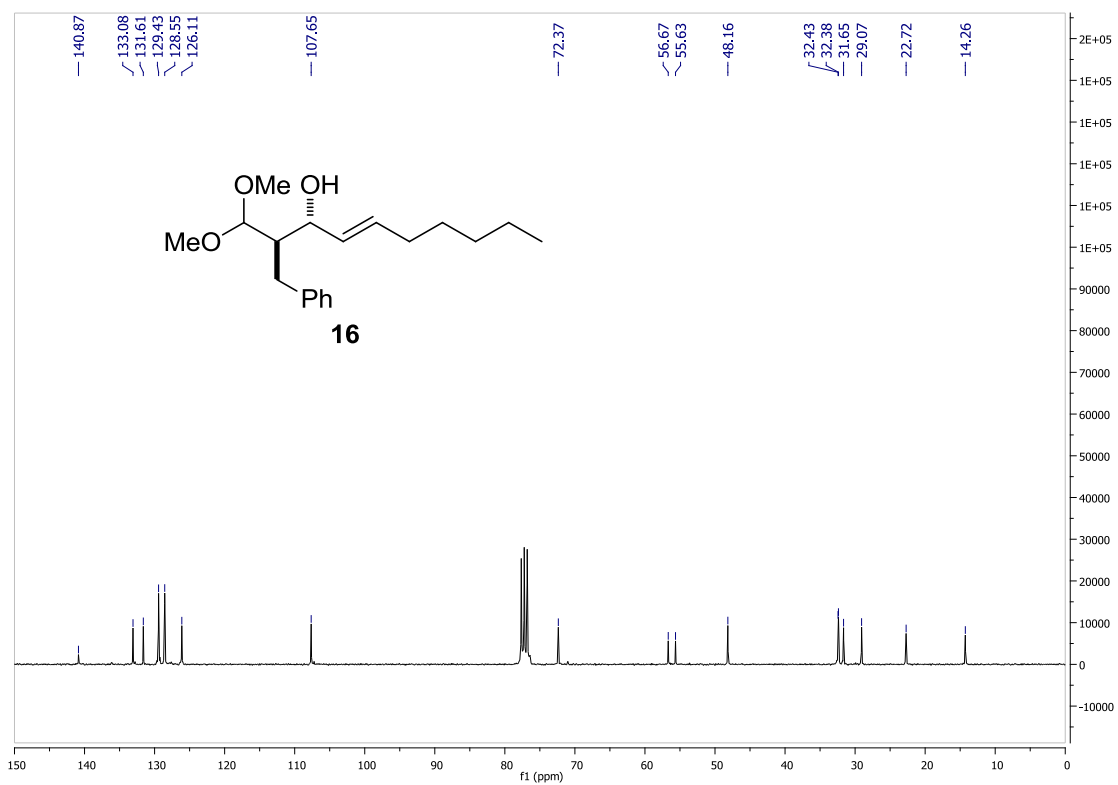

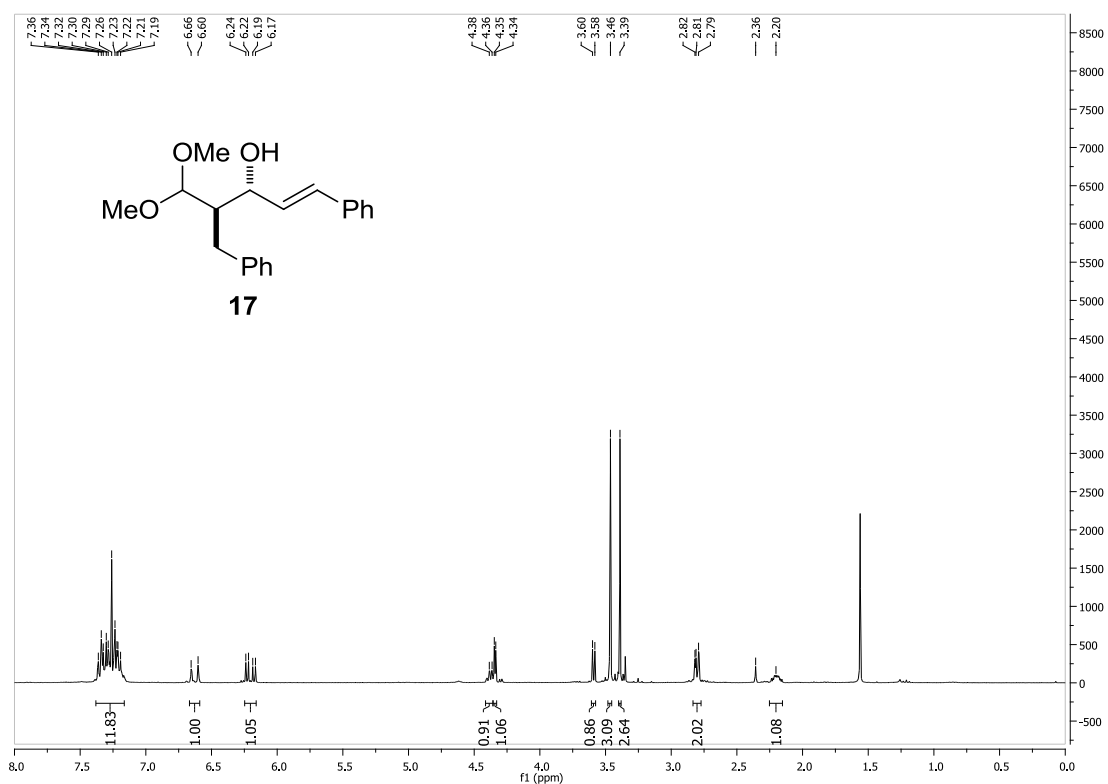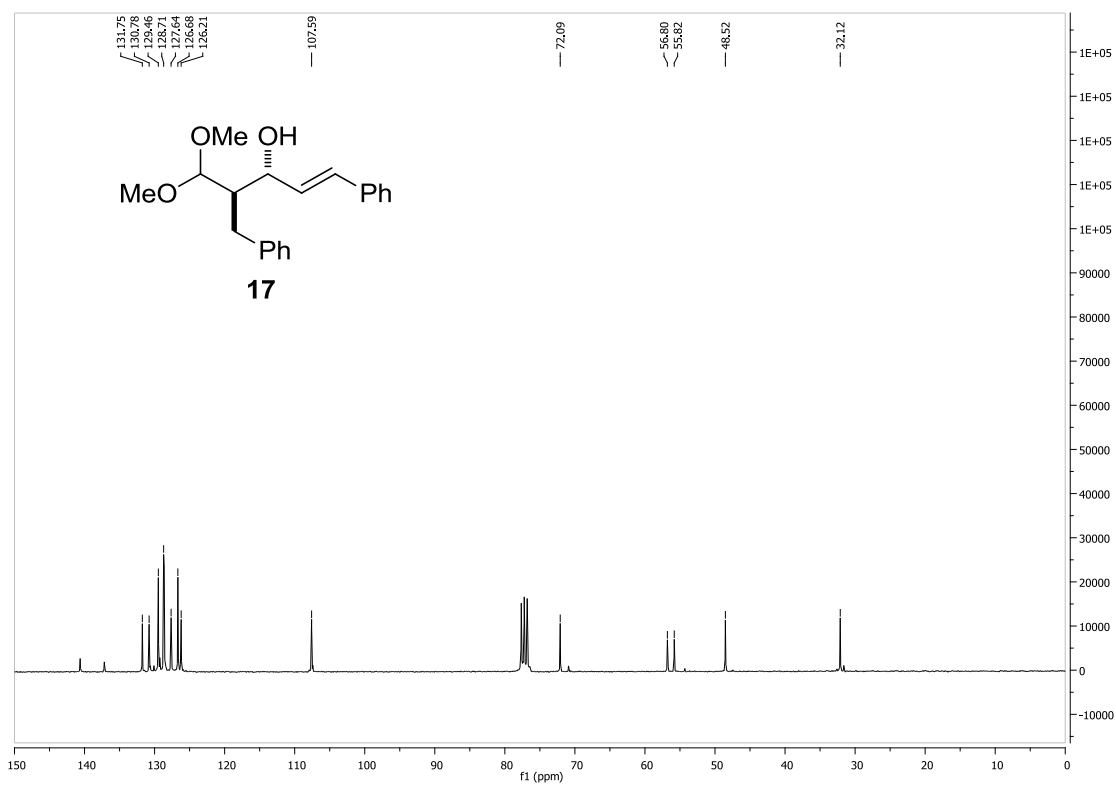



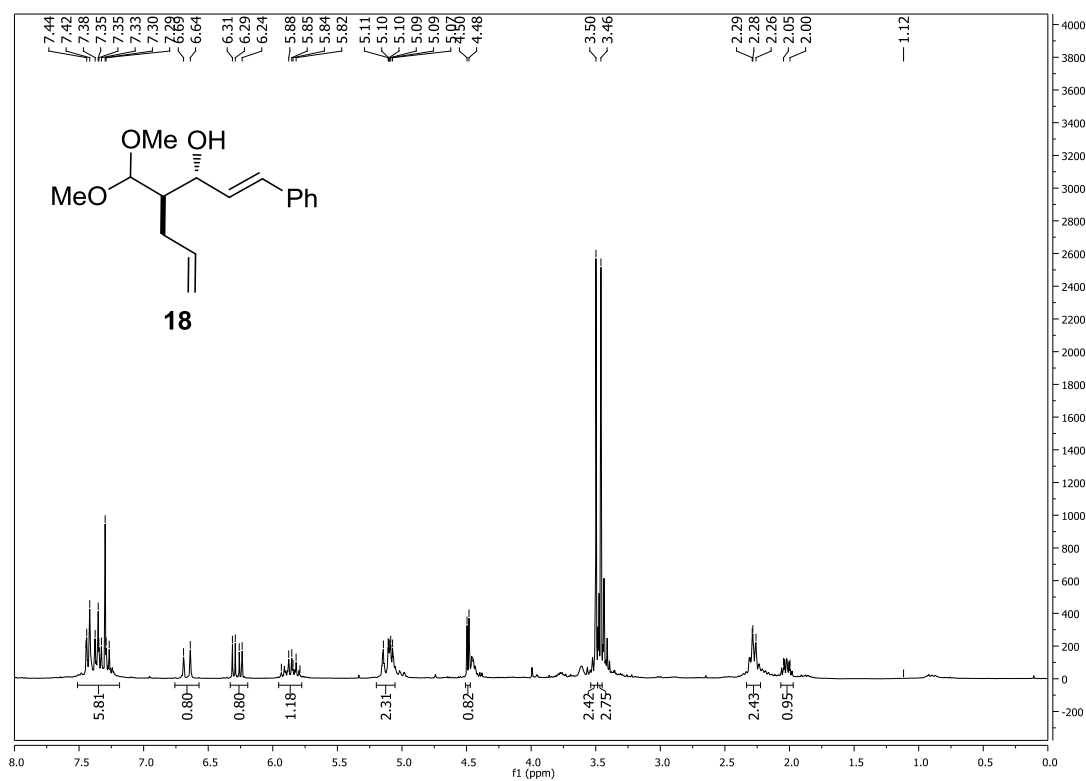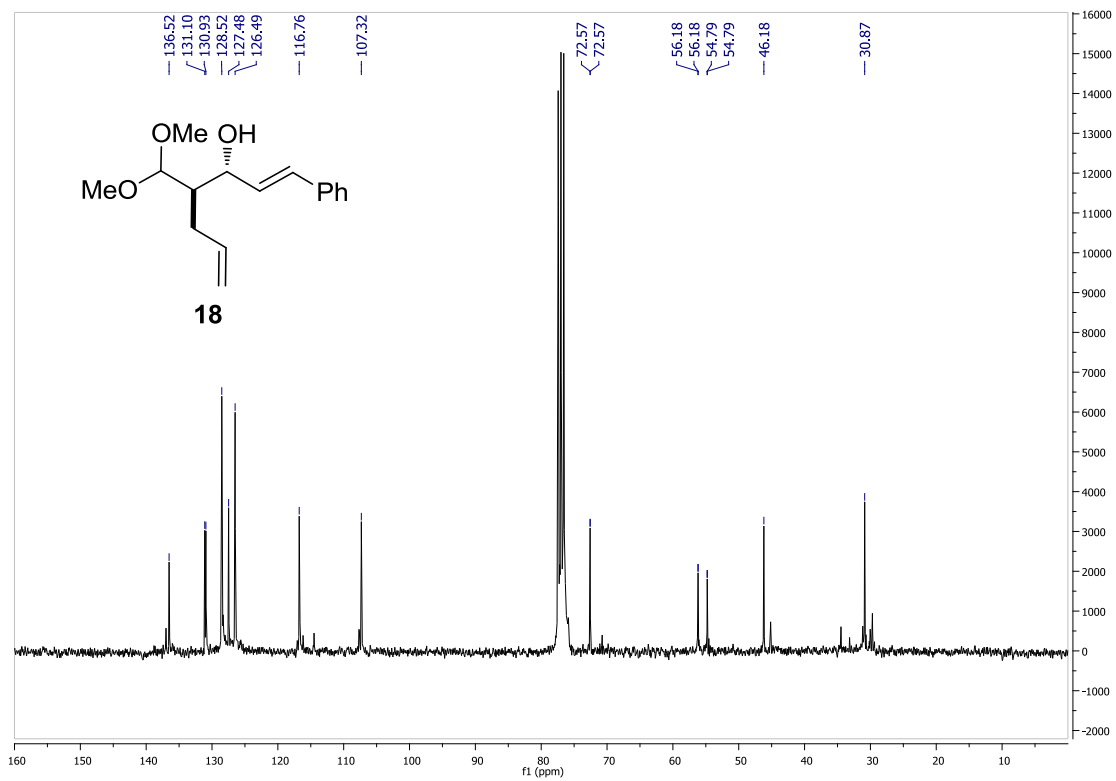

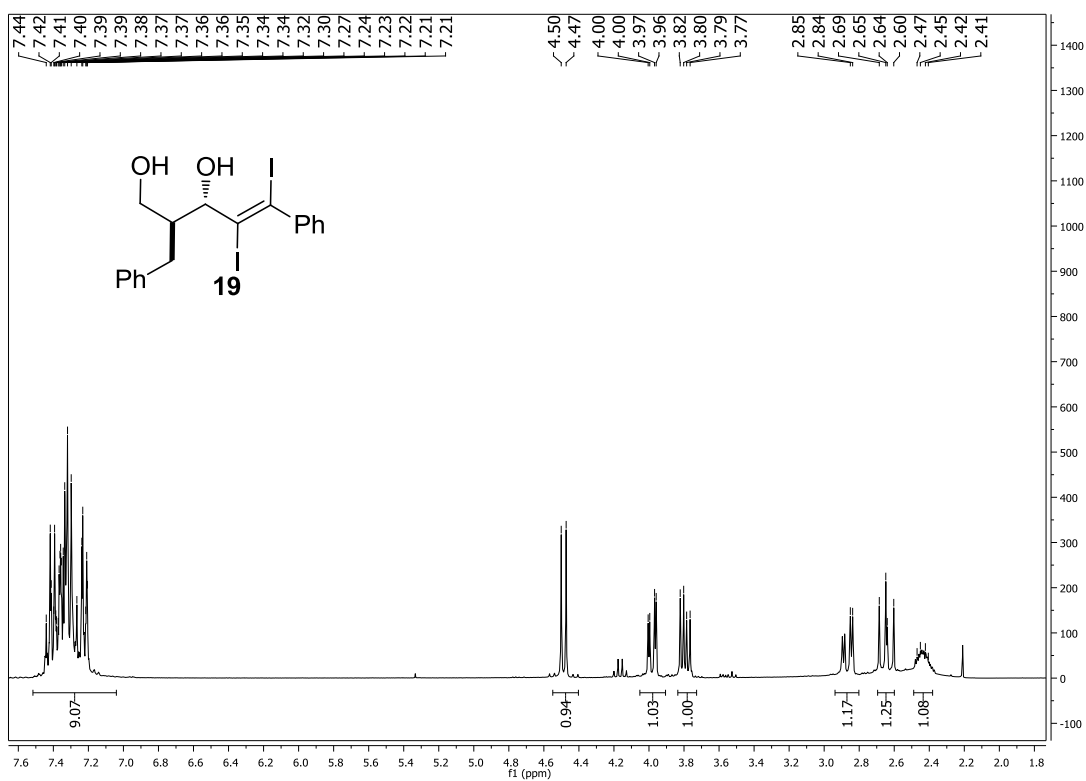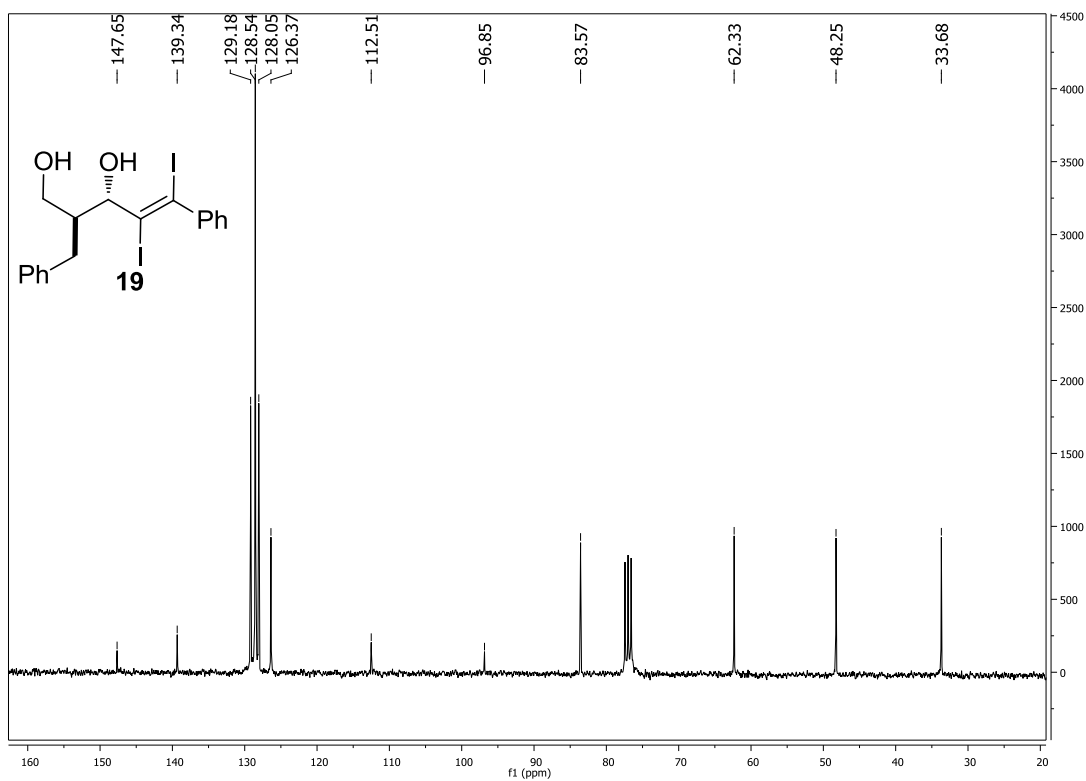

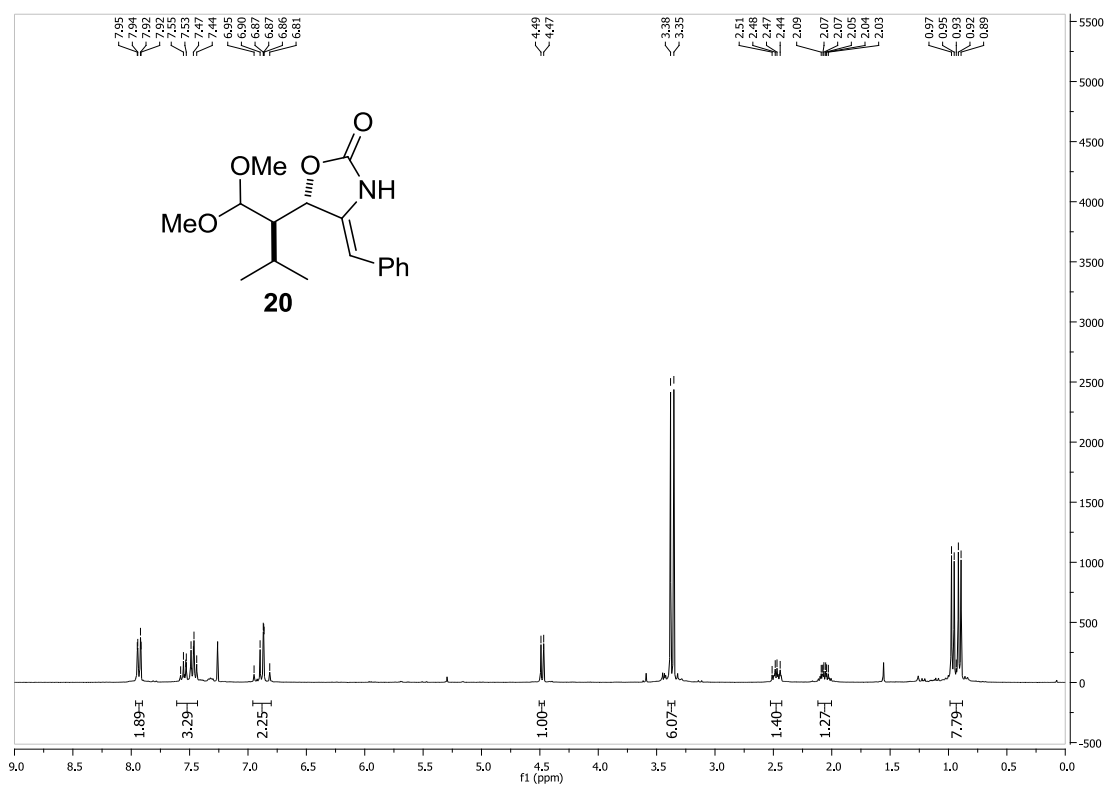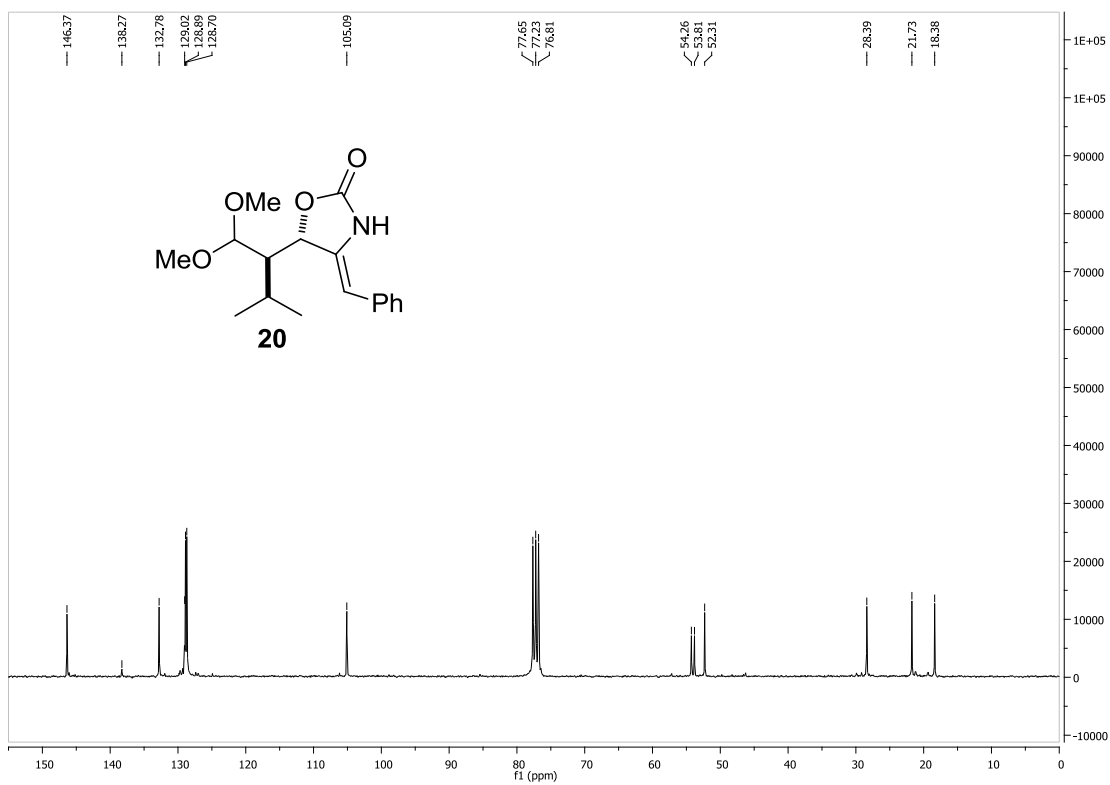

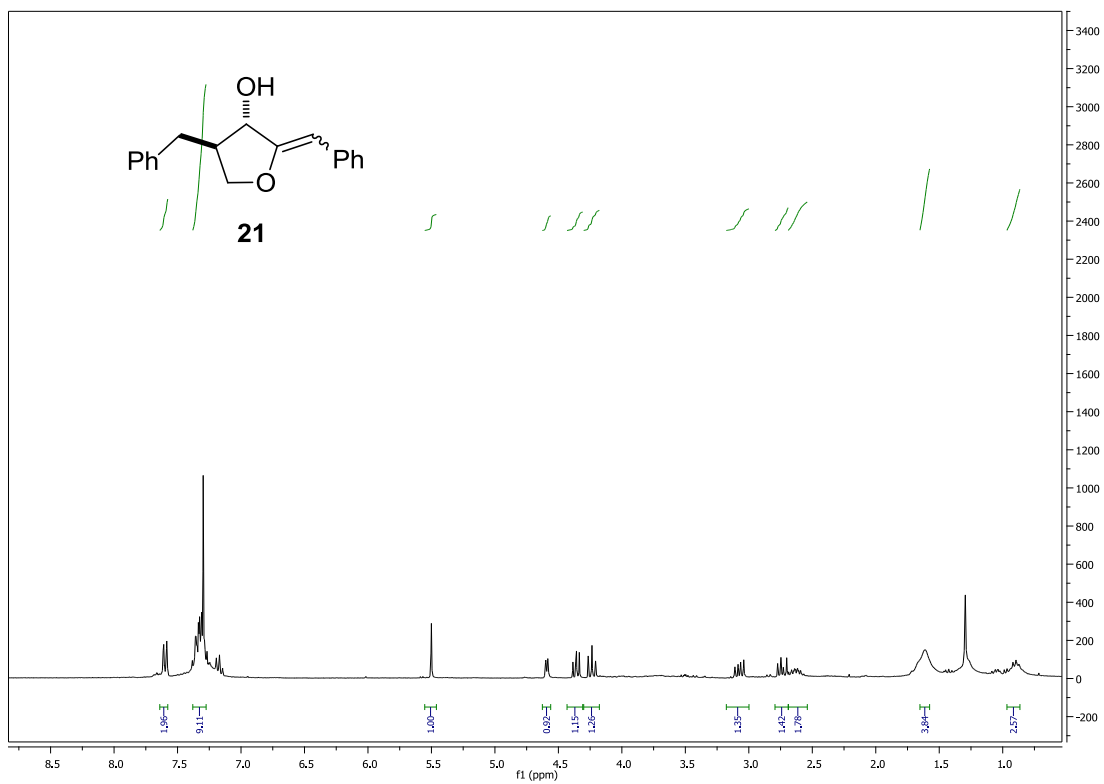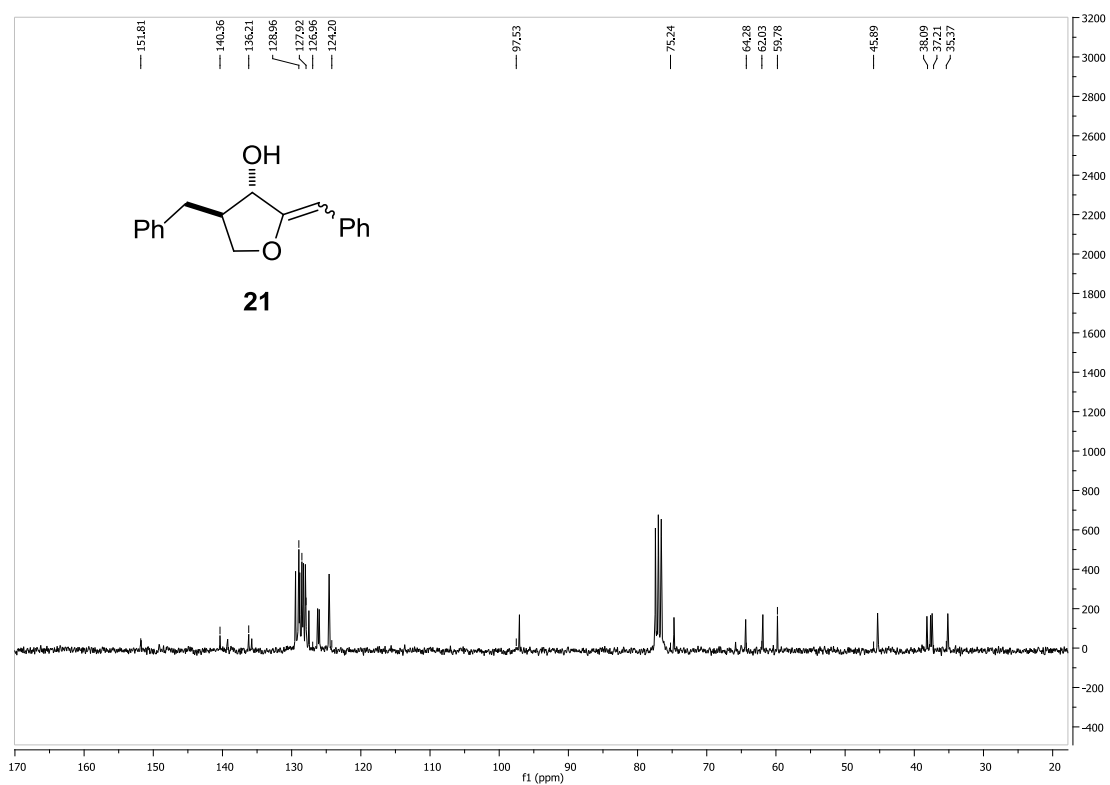

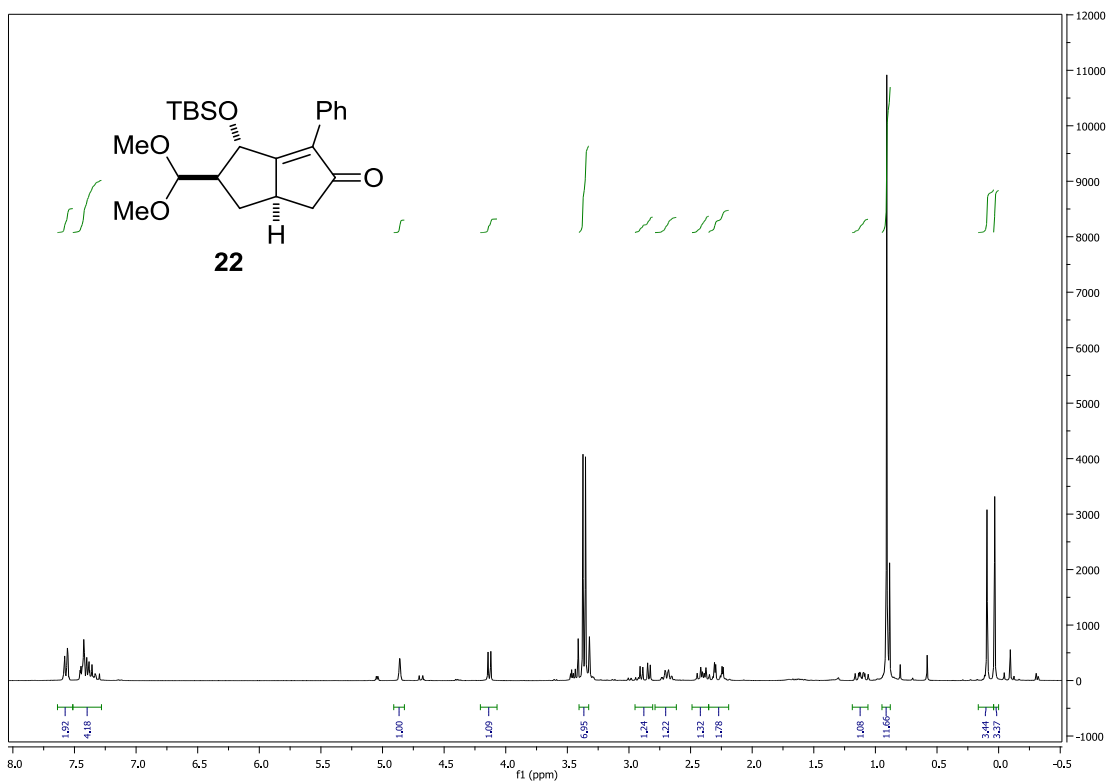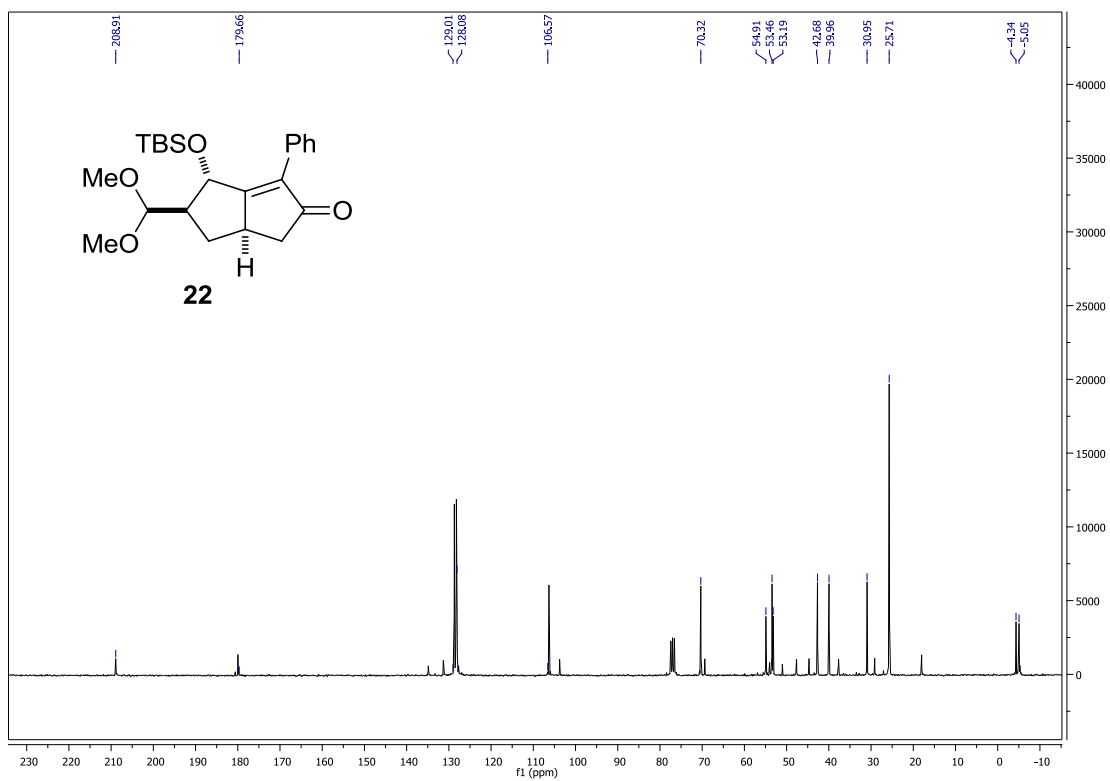

## **M) HPLC chromatograms of selected products**

PDA 210nm, Chiralpak IC, 95:5 hex:iPrOH, f:1 mL/min

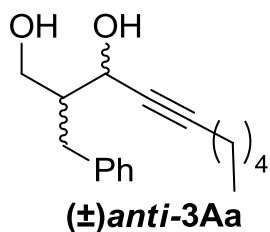

**Processed Channel Descr.: 2998 Ch2  
210nm@2.4nm**

|   | Processed Channel Descr. | RT     | Area    | % Area | Height |
|---|--------------------------|--------|---------|--------|--------|
| 1 | 2998 Ch2 210nm@2.4nm     | 35,372 | 9057902 | 48,06  | 103362 |
| 2 | 2998 Ch2 210nm@2.4nm     | 47,096 | 9790717 | 51,94  | 90944  |

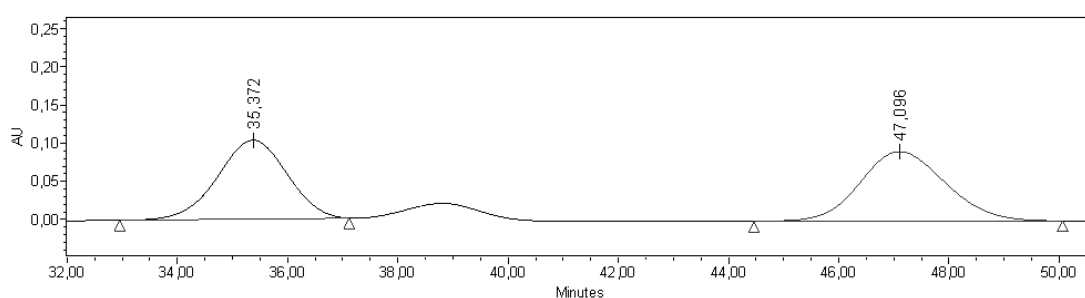

**Processed Channel Descr.: 2998 Ch2  
210nm@2.4nm**

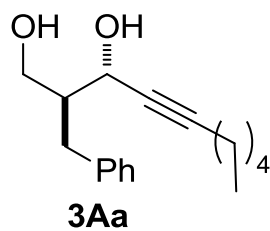

|   | Processed Channel Descr. | RT     | Area     | % Area | Height |
|---|--------------------------|--------|----------|--------|--------|
| 1 | 2998 Ch2 210nm@2.4nm     | 39,366 | 2263704  | 3,31   | 28641  |
| 2 | 2998 Ch2 210nm@2.4nm     | 49,816 | 66023952 | 96,69  | 562380 |

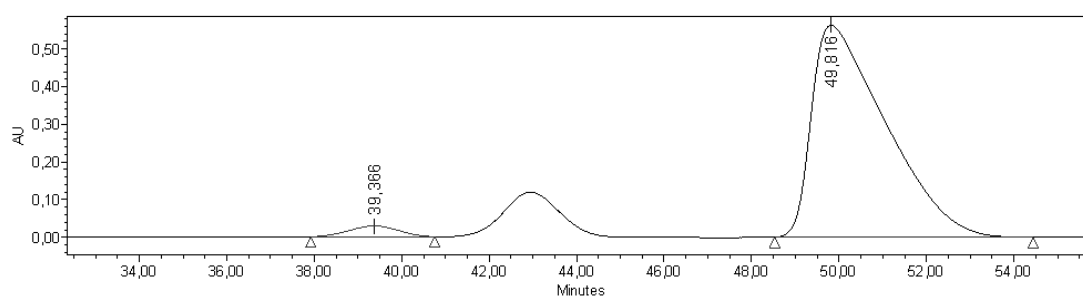

PDA 210nm, Chiralpak IC, 95:5 hex:ipr, f:1mL/min

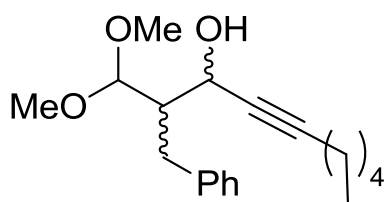

(±)*anti*-8Aa

Processed Channel Descr.: PDA 210,0 nm

|   | Processed Channel Descr. | RT     | Area     | % Area | Height |
|---|--------------------------|--------|----------|--------|--------|
| 1 | PDA 210,0 nm             | 14,282 | 10185489 | 51,83  | 294058 |
| 2 | PDA 210,0 nm             | 31,613 | 9465881  | 48,17  | 169419 |

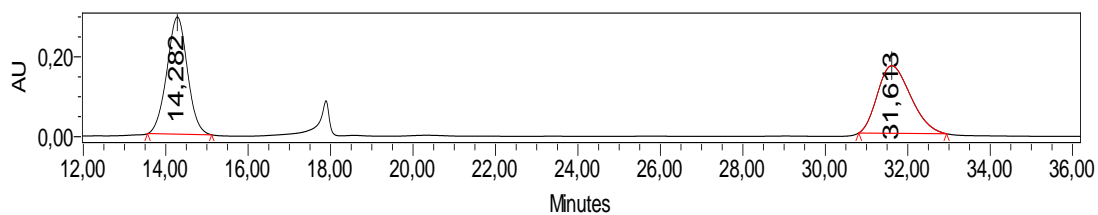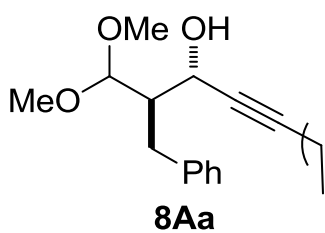

8Aa

Processed Channel Descr.: PDA 210,0 nm

|   | Processed Channel Descr. | RT     | Area     | % Area | Height  |
|---|--------------------------|--------|----------|--------|---------|
| 1 | PDA 210,0 nm             | 14,003 | 43512523 | 99,20  | 1244172 |
| 2 | PDA 210,0 nm             | 31,696 | 352587   | 0,80   | 7784    |

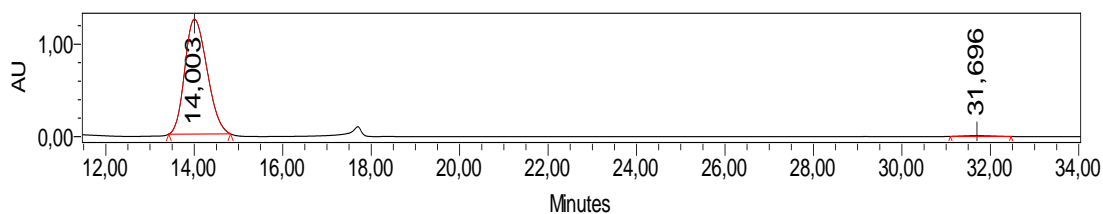



PDA 209nm, Chiralpak IC, 95:5 hex:ipr, f:1 mL/min

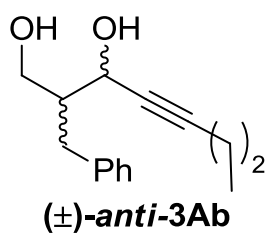

Processed Channel Descr.: 2998 Ch1  
254nm@2.4nm

|   | Processed Channel Descr. | RT     | Area    | % Area | Height |
|---|--------------------------|--------|---------|--------|--------|
| 1 | 2998 Ch1 254nm@2.4nm     | 23,005 | 7638919 | 47,27  | 50844  |
| 2 | 2998 Ch1 254nm@2.4nm     | 33,833 | 8521675 | 52,73  | 53980  |

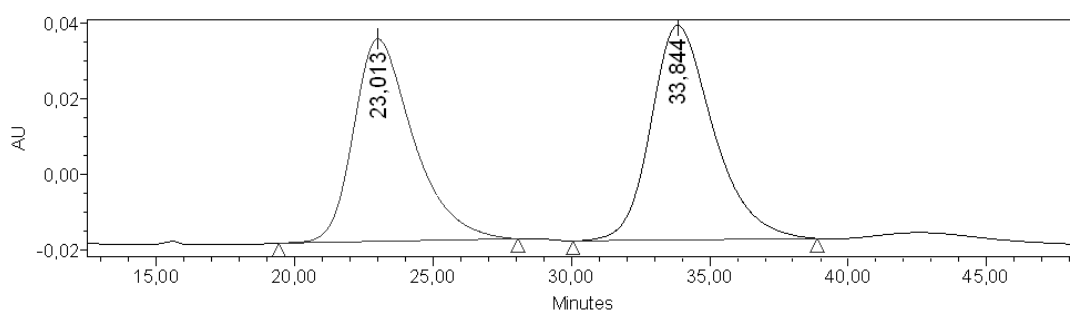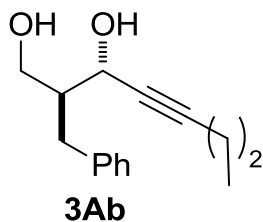

Processed Channel Descr.: PDA 209,8  
nm

|   | Processed Channel Descr. | RT     | Area    | % Area | Height |
|---|--------------------------|--------|---------|--------|--------|
| 1 | PDA 209,8 nm             | 19,688 | 8030630 | 96,78  | 49408  |
| 2 | PDA 209,8 nm             | 28,888 | 267337  | 3,22   | 3563   |

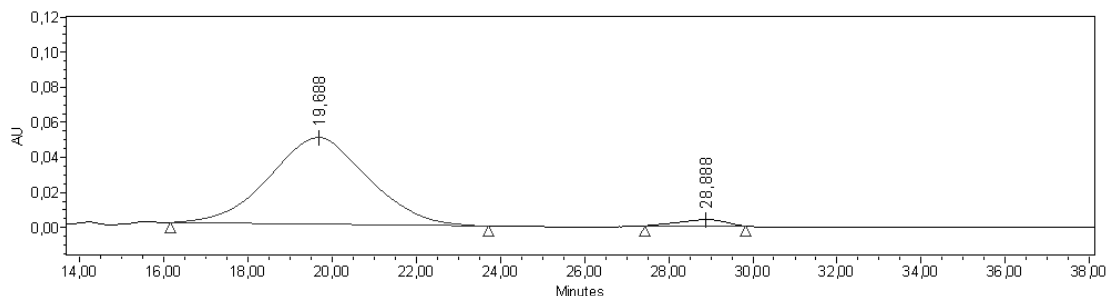

PDA 220nm, Chiralpak AS-H, 90:10 hex:ipr, f:1 mL/min

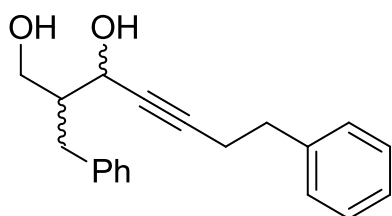

**(+)anti 3Ad**

Processed Channel Descr.: PDA 221.3 nm

|   | Processed Channel Descr. | RT     | Area    | % Area | Height |
|---|--------------------------|--------|---------|--------|--------|
| 1 | PDA 221.3 nm             | 20.073 | 4586585 | 46.31  | 111918 |
| 2 | PDA 221.3 nm             | 24.624 | 329225  | 3.32   | 7217   |
| 3 | PDA 221.3 nm             | 26.675 | 303986  | 3.07   | 6676   |
| 4 | PDA 221.3 nm             | 28.685 | 4684898 | 47.30  | 73517  |

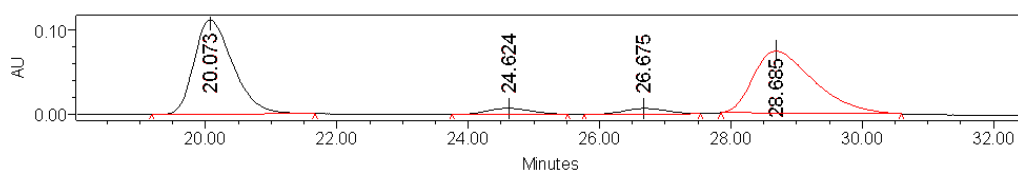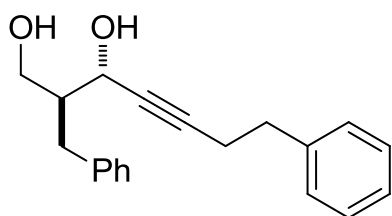

**3Ad**

Processed Channel Descr.: PDA 217.5 nm

|   | Processed Channel Descr. | RT     | Area     | % Area | Height  |
|---|--------------------------|--------|----------|--------|---------|
| 1 | PDA 217.5 nm             | 20.456 | 72215410 | 97.87  | 1547174 |
| 2 | PDA 217.5 nm             | 29.982 | 1574188  | 2.13   | 35063   |

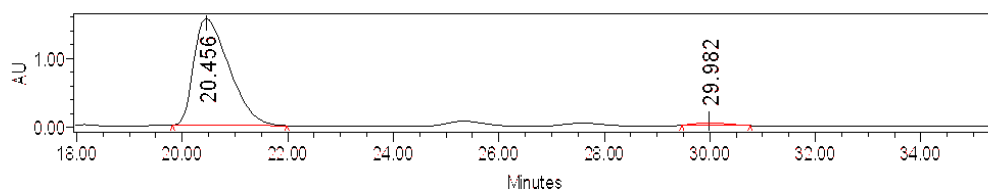

PDA 210nm, Chiralpak IC, 90:10 hex:ipr, f:1mL/min

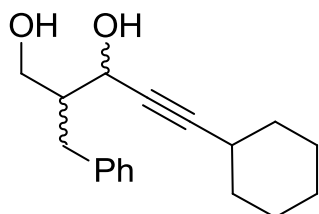

(±)*anti*-3Ae

Processed Channel Descr.: PDA 210,0 nm

|   | Processed Channel Descr. | RT     | Area     | % Area | Height |
|---|--------------------------|--------|----------|--------|--------|
| 1 | PDA 210,0 nm             | 18,508 | 15563763 | 50,04  | 365883 |
| 2 | PDA 210,0 nm             | 24,320 | 15538789 | 49,96  | 284030 |

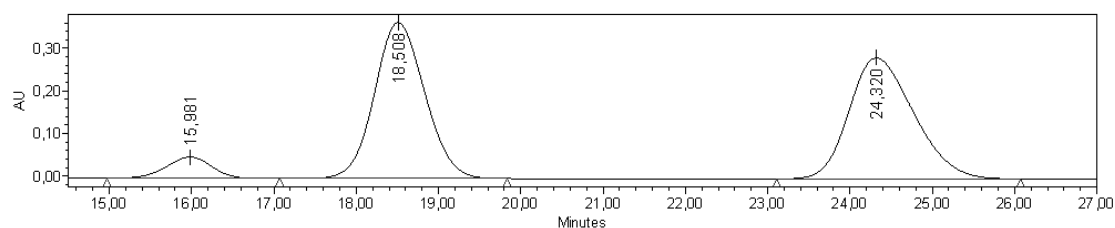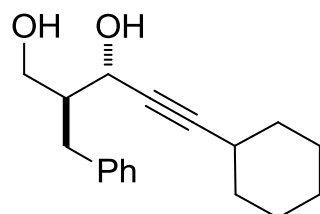

3Ae

Processed Channel Descr.: PDA 210,0 nm

|   | Processed Channel Descr. | RT     | Area     | % Area | Height |
|---|--------------------------|--------|----------|--------|--------|
| 1 | PDA 210,0 nm             | 18,973 | 1924681  | 4,69   | 52776  |
| 2 | PDA 210,0 nm             | 24,338 | 39085502 | 95,31  | 691688 |

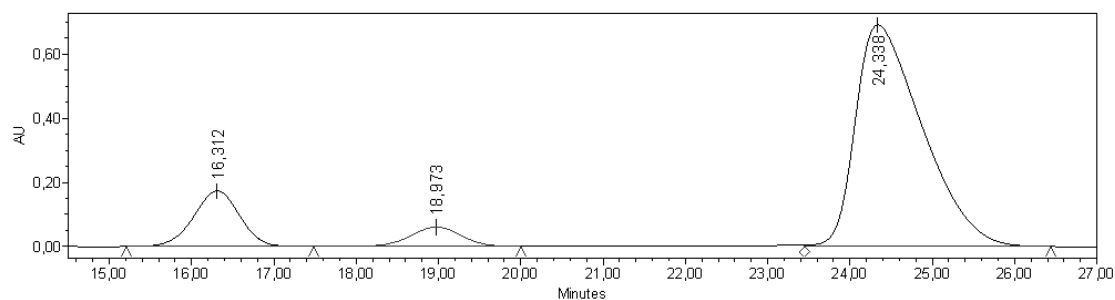

PDA 240nm, Chiralpak AS-H, 90:10 hex:ipr, f:1mL/min

Processed Channel Descr.: PDA 240,0 nm

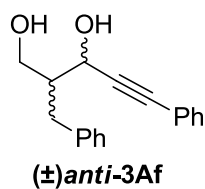

|   | Processed Channel Descr. | RT     | Area     | % Area | Height |
|---|--------------------------|--------|----------|--------|--------|
| 1 | PDA 240,0 nm             | 14,134 | 26256755 | 51,43  | 567546 |
| 2 | PDA 240,0 nm             | 17,188 | 24795620 | 48,57  | 511488 |

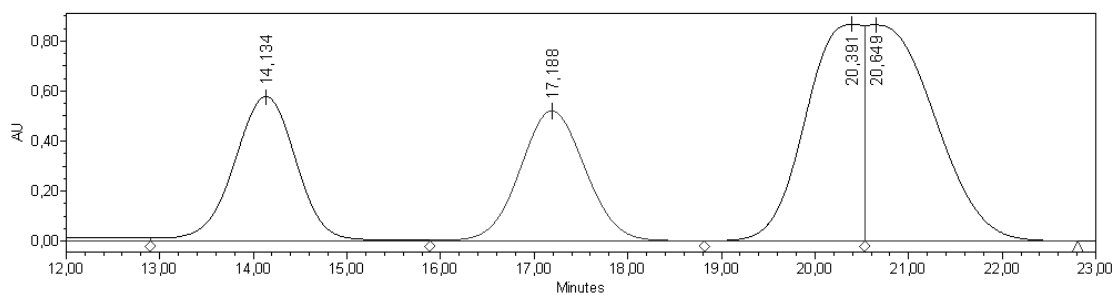

Processed Channel Descr.: PDA 240,0 nm

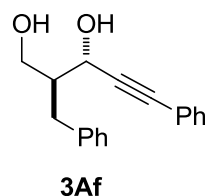

|   | Processed Channel Descr. | RT     | Area      | % Area | Height  |
|---|--------------------------|--------|-----------|--------|---------|
| 1 | PDA 240,0 nm             | 14,131 | 137379555 | 97,11  | 2319140 |
| 2 | PDA 240,0 nm             | 17,407 | 4083750   | 2,89   | 69693   |

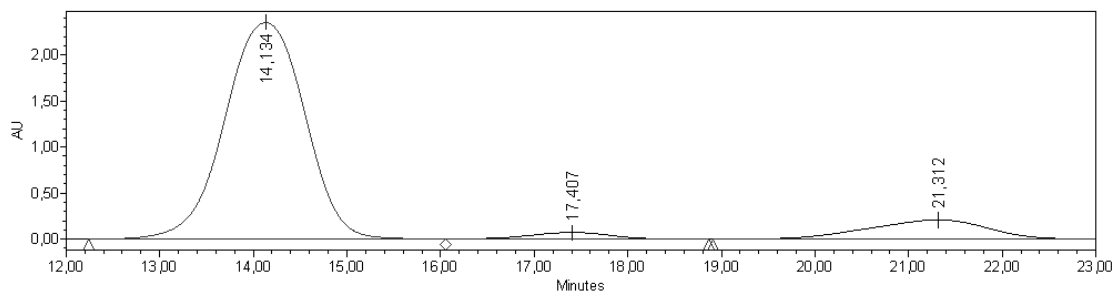

PDA 240nm, Chiralpak IC, 98:2 hex:ipr, f:05mL/min

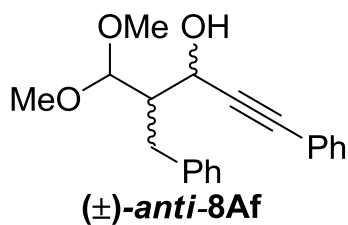

Processed Channel Descr.: PDA 210,0 nm

|   | Processed Channel Descr. | RT     | Area     | % Area | Height |
|---|--------------------------|--------|----------|--------|--------|
| 1 | PDA 210,0 nm             | 31,294 | 12131233 | 50,58  | 170537 |
| 2 | PDA 210,0 nm             | 36,323 | 11851663 | 49,42  | 151805 |

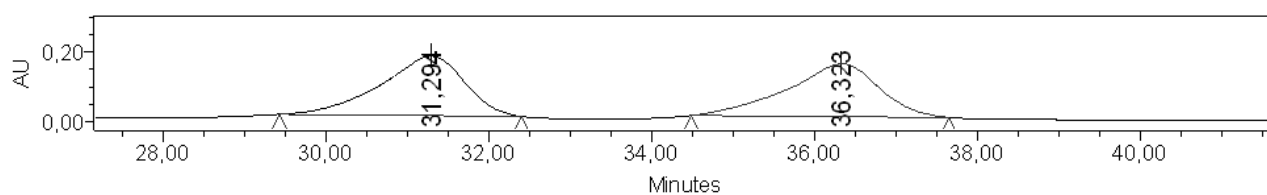

Processed Channel Descr.: PDA 210,0 nm

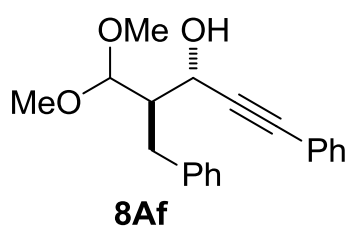

|   | Processed Channel Descr. | RT     | Area    | % Area | Height |
|---|--------------------------|--------|---------|--------|--------|
| 1 | PDA 210,0 nm             | 30,913 | 253398  | 2,67   | 5972   |
| 2 | PDA 210,0 nm             | 36,912 | 9243051 | 97,33  | 117740 |

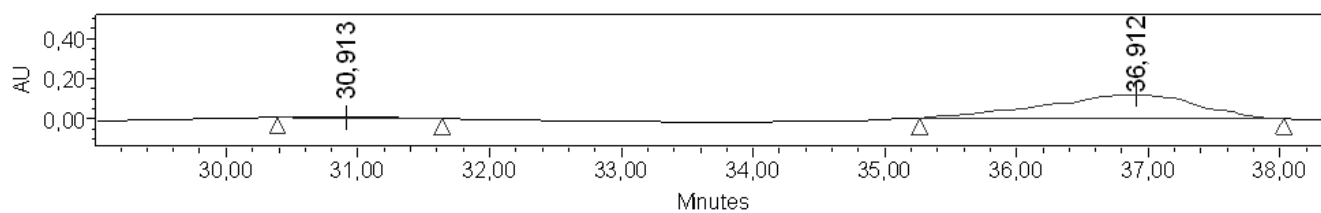

PDA 240nm, Chiralpak AS-H, 90:10 hex:ipr, f:1 mL/min

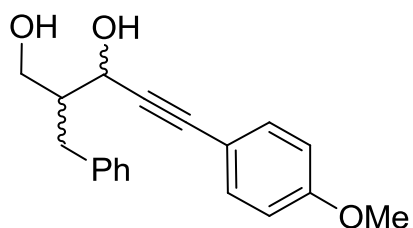

**(±)anti-3Ag**

Processed Channel Descr.: PDA 240,0  
nm

|   | Processed Channel Descr. | RT     | Area    | % Area | Height |
|---|--------------------------|--------|---------|--------|--------|
| 1 | PDA 240,0 nm             | 28,118 | 3287985 | 51,41  | 43503  |
| 2 | PDA 240,0 nm             | 30,952 | 3107720 | 48,59  | 39630  |

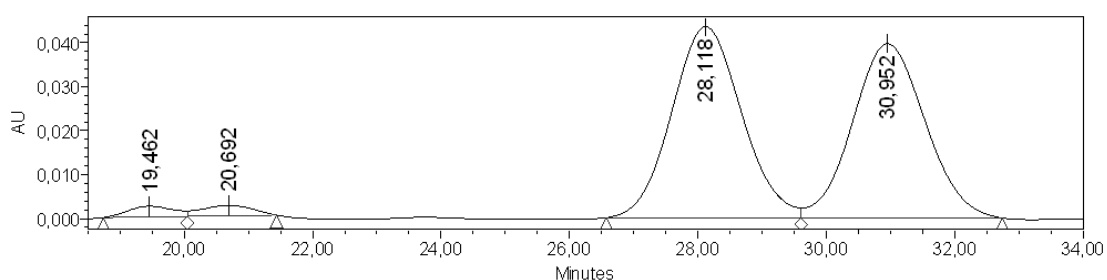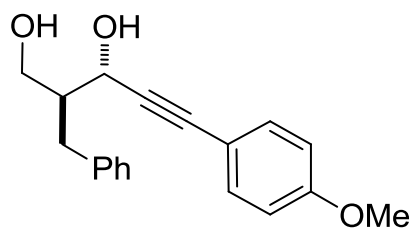

**3Ag**

Processed Channel Descr.: PDA 240,0 nm

|   | Processed Channel Descr. | RT     | Area     | % Area | Height  |
|---|--------------------------|--------|----------|--------|---------|
| 1 | PDA 240,0 nm             | 27,990 | 83366956 | 95,97  | 1028432 |
| 2 | PDA 240,0 nm             | 31,131 | 3500131  | 4,03   | 42865   |

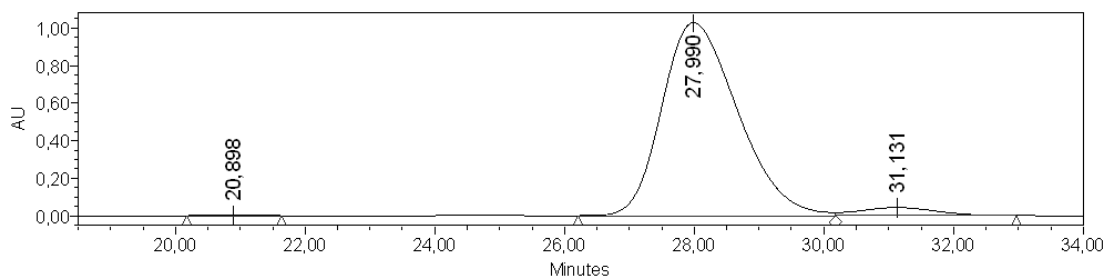

PDA 240nm, Chiralpak AS-H, 90:10 hex:ipr, f:1 mL/min

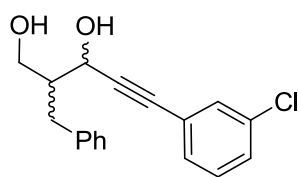

(±)anti-3Ah

Processed Channel Descr.: PDA 240,0 nm

|   | Processed Channel Descr. | RT     | Area     | % Area | Height  |
|---|--------------------------|--------|----------|--------|---------|
| 1 | PDA 240,0 nm             | 11,754 | 37766089 | 50,20  | 1288695 |
| 2 | PDA 240,0 nm             | 13,967 | 37468214 | 49,80  | 1075921 |

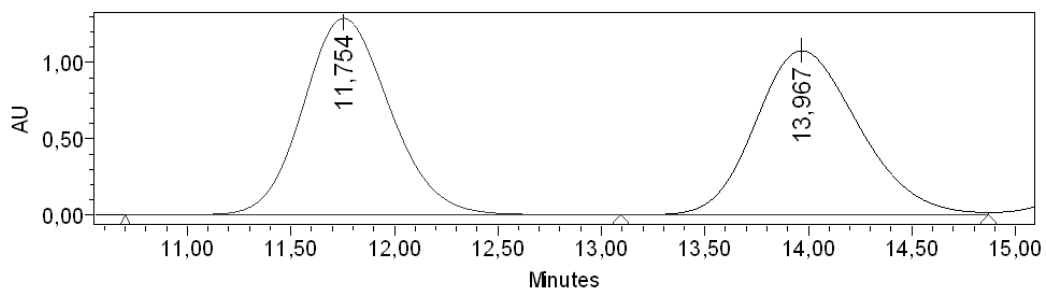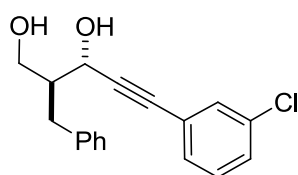

3Ah

Processed Channel Descr.: PDA 240,0 nm

|   | Processed Channel Descr. | RT     | Area     | % Area | Height  |
|---|--------------------------|--------|----------|--------|---------|
| 1 | PDA 240,0 nm             | 11,724 | 54770546 | 95,42  | 1674406 |
| 2 | PDA 240,0 nm             | 13,992 | 2628661  | 4,58   | 66162   |

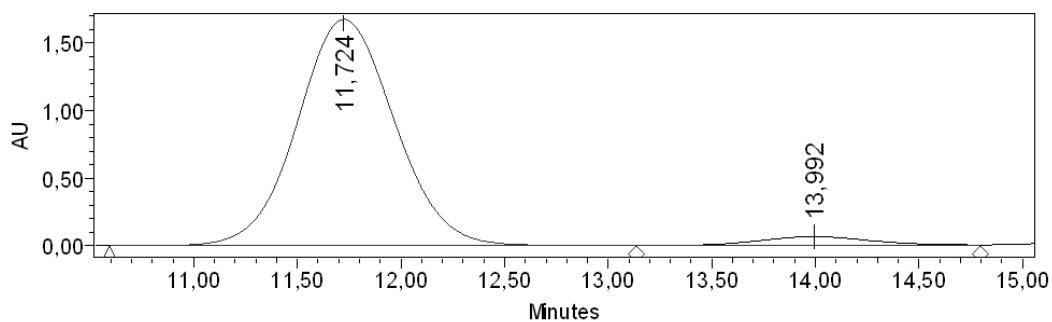

**PDA 208.0 nm, Phenomenex Lux 3 Cellulose-4, 93 : 7 hex : ipr, f: 1 mL/min**

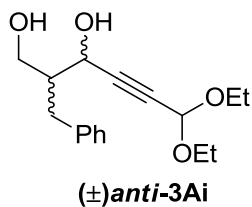

|   | Processed Channel Descr. | RT     | Area    | % Area | Height |
|---|--------------------------|--------|---------|--------|--------|
| 1 | PDA 208.0 nm             | 19.745 | 616200  | 3.26   | 21209  |
| 2 | PDA 208.0 nm             | 22.817 | 620133  | 3.28   | 18256  |
| 3 | PDA 208.0 nm             | 36.392 | 8932161 | 47.19  | 164853 |
| 4 | PDA 208.0 nm             | 50.275 | 8759745 | 46.28  | 111366 |

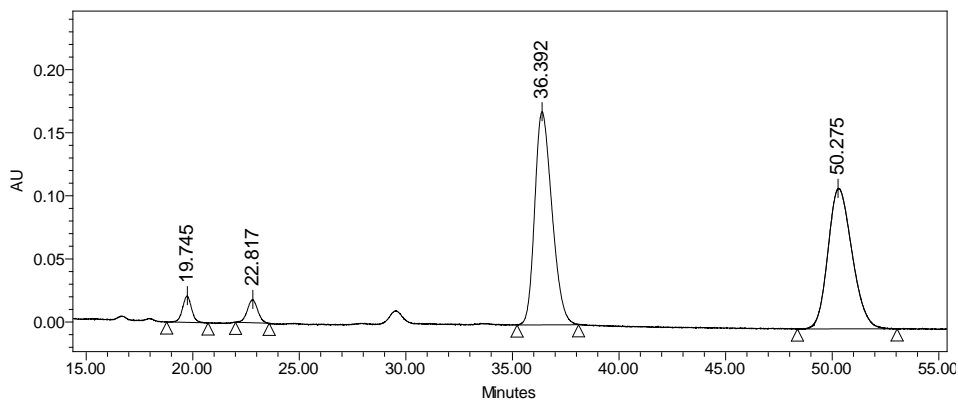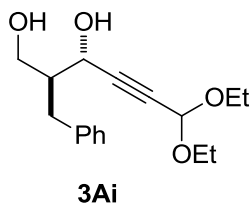

|   | Processed Channel Descr. | RT     | Area     | % Area | Height |
|---|--------------------------|--------|----------|--------|--------|
| 1 | PDA 208.0 nm             | 35.859 | 901691   | 3.07   | 16652  |
| 2 | PDA 208.0 nm             | 48.798 | 28477495 | 96.93  | 350182 |

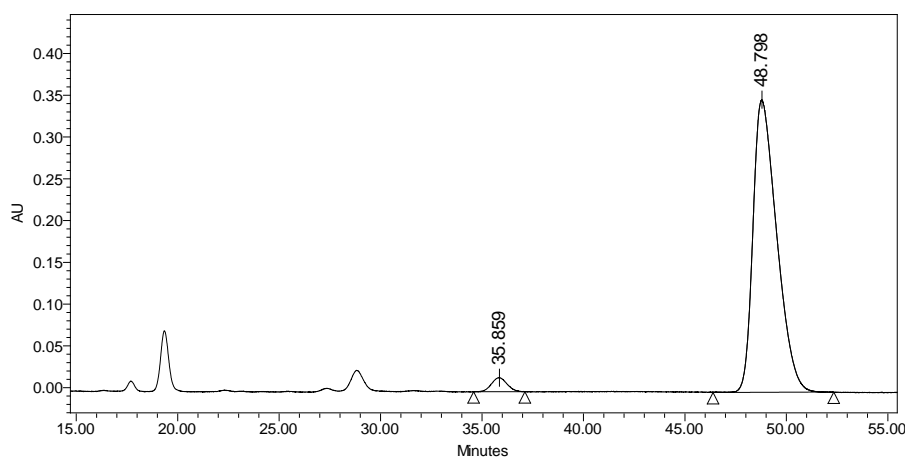



PDA 240nm, Chiralpak AD-H, 98:2 hex:ipr, f:1 mL/min

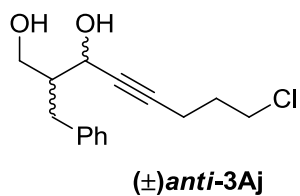

Processed Channel Descr.: PDA 210,0 nm

|   | Processed Channel Descr. | RT      | Area     | % Area | Height |
|---|--------------------------|---------|----------|--------|--------|
| 1 | PDA 210,0 nm             | 55,794  | 3016962  | 6,65   | 16803  |
| 2 | PDA 210,0 nm             | 65,219  | 3774808  | 8,32   | 16200  |
| 3 | PDA 210,0 nm             | 104,689 | 19451537 | 42,89  | 85214  |
| 4 | PDA 210,0 nm             | 112,681 | 19108239 | 42,13  | 74861  |

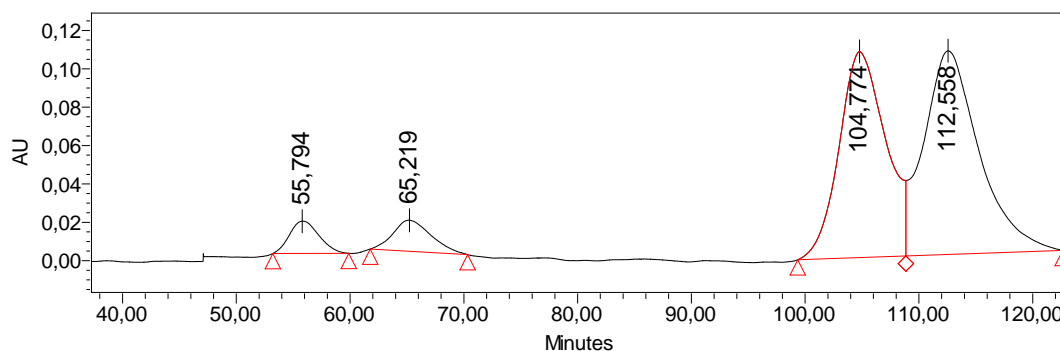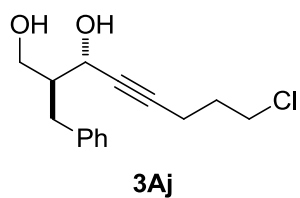

Processed Channel Descr.: PDA 210,0 nm

|   | Processed Channel Descr. | RT      | Area     | % Area | Height |
|---|--------------------------|---------|----------|--------|--------|
| 1 | PDA 210,0 nm             | 100,886 | 18983398 | 100,00 | 64457  |

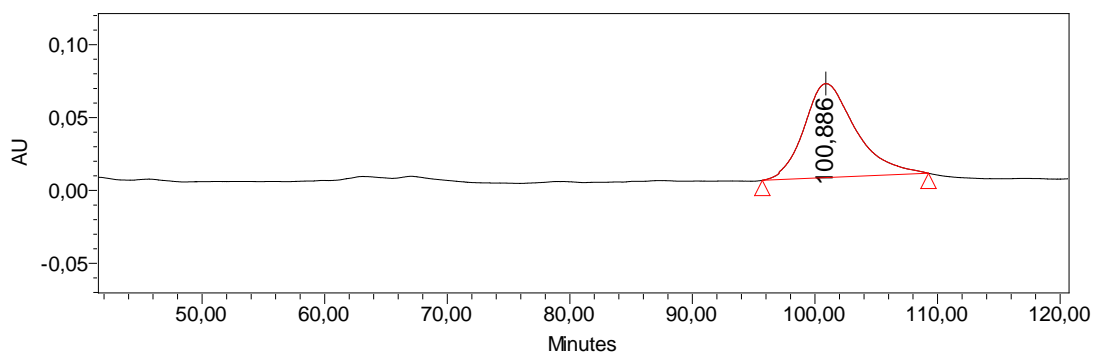

PDA 210nm, Chiralpak AY-H, 95:5 hex:ipr, f:1 mL/min

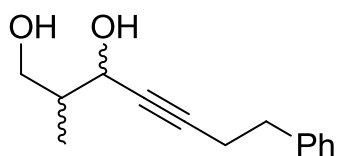

(±)*anti*-3Bd

Processed Channel Descr.: PDA 211.9 nm

|   | Processed Channel Descr. | RT     | Area     | % Area | Height |
|---|--------------------------|--------|----------|--------|--------|
| 1 | PDA 211.9 nm             | 26.644 | 55924034 | 59.53  | 985210 |
| 2 | PDA 211.9 nm             | 32.114 | 6866605  | 7.31   | 78522  |
| 3 | PDA 211.9 nm             | 35.005 | 31146529 | 33.16  | 481322 |

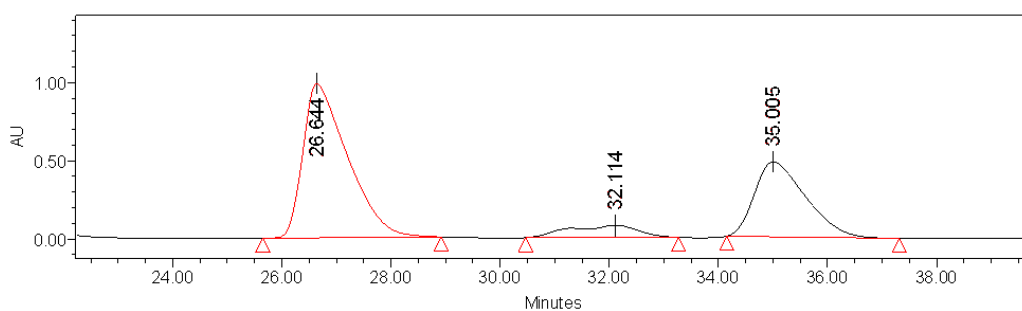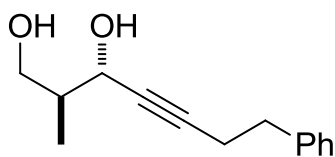

3Bd

Processed Channel Descr.: PDA 208.4 nm

|   | Processed Channel Descr. | RT     | Area     | % Area | Height  |
|---|--------------------------|--------|----------|--------|---------|
| 1 | PDA 208.4 nm             | 26.558 | 60759401 | 94.83  | 1119080 |
| 2 | PDA 208.4 nm             | 31.837 | 3239118  | 5.06   | 56806   |
| 3 | PDA 208.4 nm             | 35.467 | 75713    | 0.12   | 2750    |

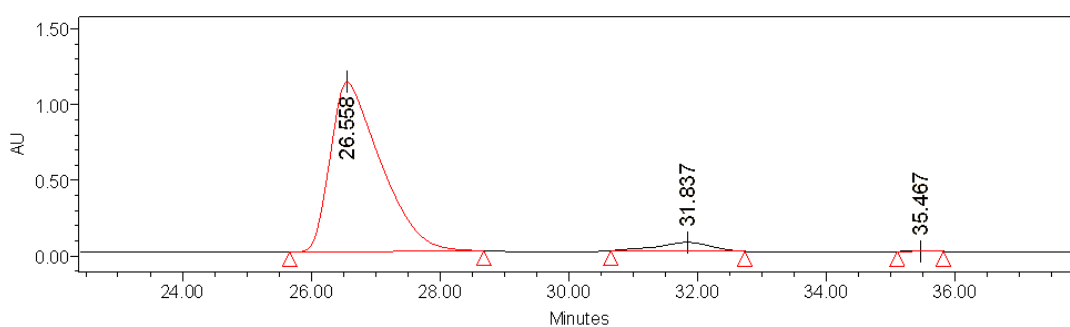

PDA 254.1nm, Chiralpak IC, 90:10 hex:ipr, f:1mL/min

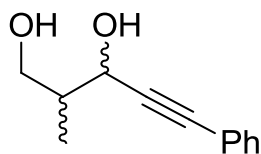

(±)*anti*-3Bf

Processed Channel Descr.: PDA 254.1 nm

|   | Processed Channel Descr. | RT     | Area     | % Area | Height |
|---|--------------------------|--------|----------|--------|--------|
| 1 | PDA 254.1 nm             | 13.699 | 21138223 | 50.38  | 494449 |
| 2 | PDA 254.1 nm             | 15.651 | 20821017 | 49.62  | 439792 |

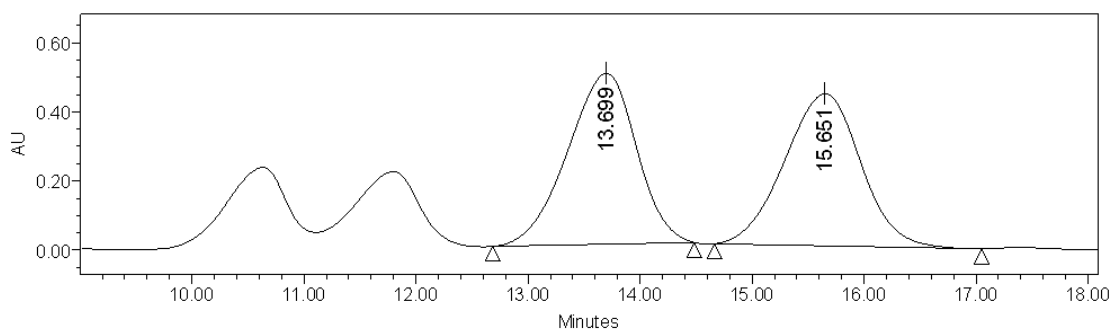

Processed Channel Descr.: PDA 254.3 nm

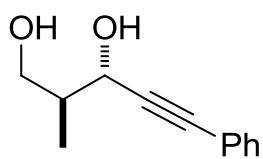

3Bf

|   | Processed Channel Descr. | RT     | Area     | % Area | Height |
|---|--------------------------|--------|----------|--------|--------|
| 1 | PDA 254.3 nm             | 14.285 | 322132   | 2.10   | 9375   |
| 2 | PDA 254.3 nm             | 16.410 | 15005305 | 97.90  | 292813 |

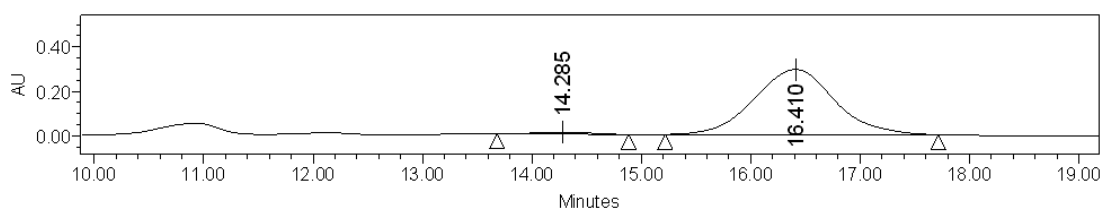

PDA 208.0 nm, Daicel Chiralpak IC-3 93 : 7 hex : ipr, f: 1.2 mL/min

Processed Channel Descr.: PDA 215.0 nm

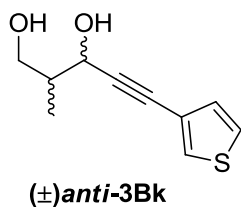

|   | Processed Channel Descr. | RT     | Area     | % Area | Height |
|---|--------------------------|--------|----------|--------|--------|
| 1 | PDA 215.0 nm             | 23.746 | 3102156  | 5.40   | 97838  |
| 2 | PDA 215.0 nm             | 25.933 | 2941034  | 5.12   | 84795  |
| 3 | PDA 215.0 nm             | 31.534 | 24562707 | 42.76  | 578382 |
| 4 | PDA 215.0 nm             | 41.821 | 26830736 | 46.71  | 466338 |

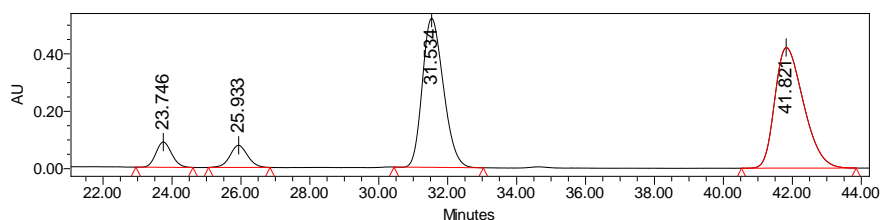

Processed Channel Descr.: PDA 215.0 nm

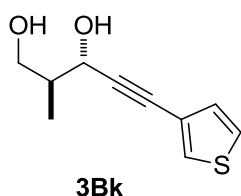

|   | Processed Channel Descr. | RT     | Area     | % Area | Height |
|---|--------------------------|--------|----------|--------|--------|
| 1 | PDA 215.0 nm             | 23.915 | 3419753  | 8.14   | 104377 |
| 2 | PDA 215.0 nm             | 26.157 | 743910   | 1.77   | 21025  |
| 3 | PDA 215.0 nm             | 31.957 | 367740   | 0.88   | 8984   |
| 4 | PDA 215.0 nm             | 41.832 | 37486650 | 89.22  | 567037 |

| el | RT     | Area     | % Area | Height |
|----|--------|----------|--------|--------|
|    | 31.957 | 331909   | 0.86   | 8599   |
|    | 41.832 | 38186368 | 99.14  | 577829 |

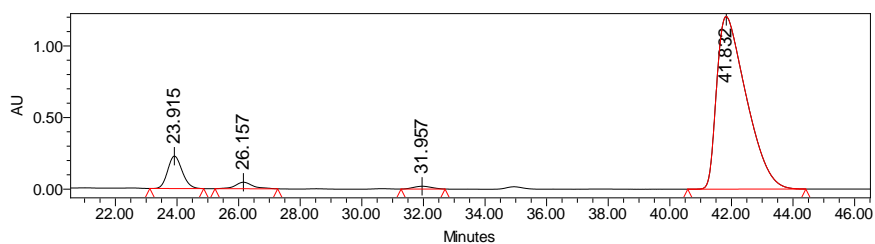

PDA 225.0 nm, Daicel Chiralcel OD-H ,95 : 5 hex : ipr, f: 0.75 mL/min

Processed Channel Descr.: PDA 225.0 nm

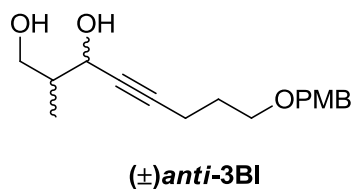

|   | Processed Channel Descr. | RT     | Area     | % Area | Height |
|---|--------------------------|--------|----------|--------|--------|
| 1 | PDA 225.0 nm             | 42,013 | 2067904  | 4,258  | 21047  |
| 2 | PDA 225.0 nm             | 45,973 | 20761994 | 42,752 | 168818 |
| 3 | PDA 225.0 nm             | 51,200 | 25733573 | 52,990 | 172220 |

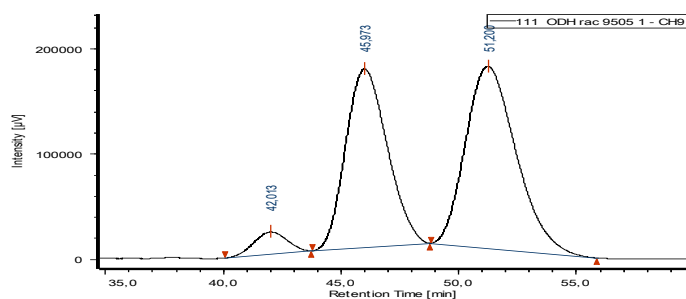

Processed Channel Descr.: PDA 225.0 nm

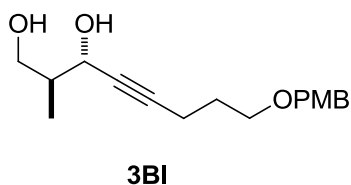

|   | Processed Channel Descr. | RT     | Area     | % Area | Height |
|---|--------------------------|--------|----------|--------|--------|
| 1 | PDA 225.0 nm             | 42,067 | 4412274  | 9,802  | 37511  |
| 2 | PDA 225.0 nm             | 46,320 | 82187    | 0,183  | 1107   |
| 2 | PDA 225.0 nm             | 51,333 | 40520603 | 90,016 | 261500 |

Processed Channel Descr.: PDA 225.0 nm

|   | Processed Channel Descr. | RT     | Area     | % Area | Height |
|---|--------------------------|--------|----------|--------|--------|
| 1 | PDA 225.0 nm             | 46,320 | 100850   | 0,248  | 1241   |
| 2 | PDA 225.0 nm             | 51,333 | 40588685 | 99,752 | 261661 |

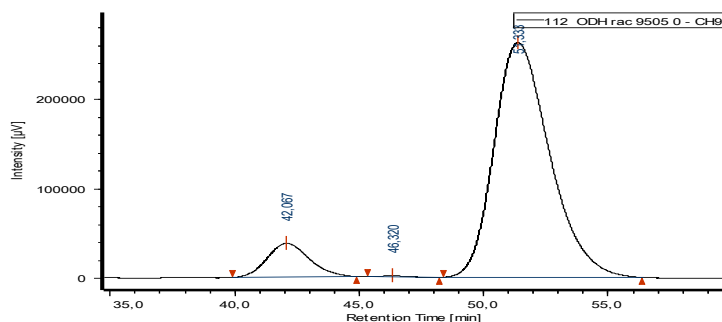

PDA 240nm, Chiralpak IC, 98:2 hex:et, f:1 mL/min

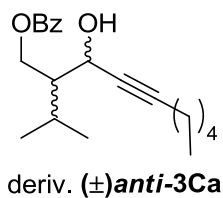

Processed Channel Descr.: PDA 225.5 nm

|   | Processed Channel Descr. | RT     | Area    | % Area | Height |
|---|--------------------------|--------|---------|--------|--------|
| 1 | PDA 225.5 nm             | 15.577 | 6945095 | 50.99  | 230890 |
| 2 | PDA 225.5 nm             | 17.598 | 6674108 | 49.01  | 172715 |

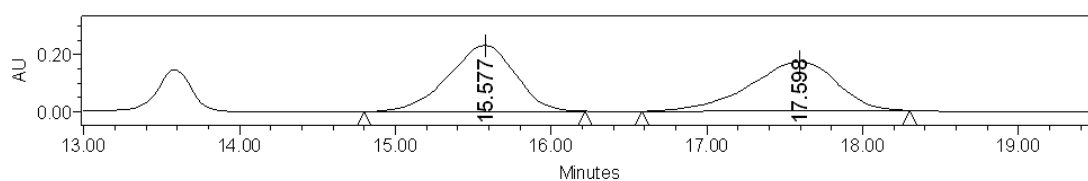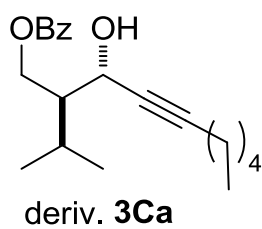

Processed Channel Descr.: PDA 209.8 nm

|   | Processed Channel Descr. | RT     | Area     | % Area | Height |
|---|--------------------------|--------|----------|--------|--------|
| 1 | PDA 209.8 nm             | 15.509 | 36180568 | 100.00 | 892057 |

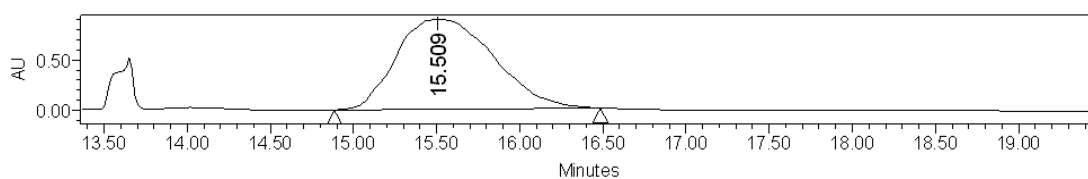

PDA 240nm, Chiralpak AY-H, 90:10 hex:ipr, f:1mL/min

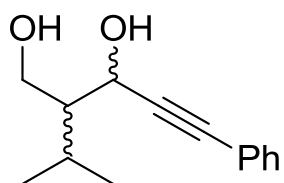

**(±)-anti-3Cf**

Processed Channel Descr.: PDA 240,0 nm

|   | Processed Channel Descr. | RT    | Area     | % Area | Height  |
|---|--------------------------|-------|----------|--------|---------|
| 1 | PDA 240,0 nm             | 8,356 | 50518329 | 50,10  | 2103434 |
| 2 | PDA 240,0 nm             | 9,551 | 50315308 | 49,90  | 1930338 |

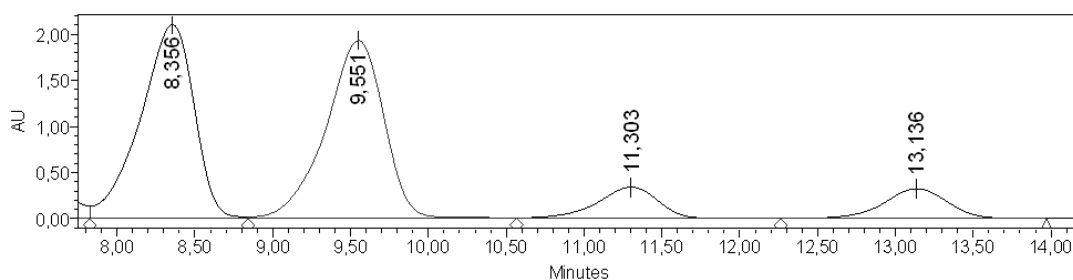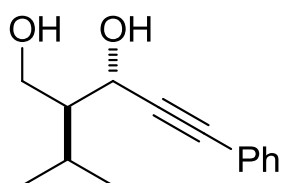

**3Cf**

Processed Channel Descr.: PDA 240,0 nm

|   | Processed Channel Descr. | RT    | Area     | % Area | Height  |
|---|--------------------------|-------|----------|--------|---------|
| 1 | PDA 240,0 nm             | 8,482 | 63648367 | 96,92  | 2458930 |
| 2 | PDA 240,0 nm             | 9,726 | 2021843  | 3,08   | 70139   |

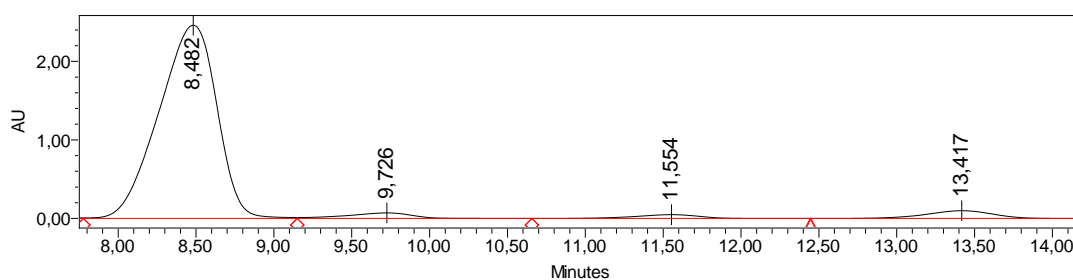

PDA 240nm, Chiralpak IB, 95:5 hex:ipr, f:1mL/min

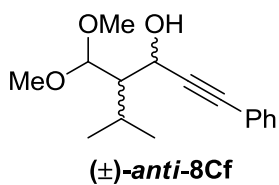

Processed Channel Descr.: PDA 210,0  
nm

|   | Processed Channel Descr. | RT    | Area    | % Area | Height |
|---|--------------------------|-------|---------|--------|--------|
| 1 | PDA 210,0 nm             | 4,492 | 8669379 | 49,61  | 374339 |
| 2 | PDA 210,0 nm             | 5,812 | 8805884 | 50,39  | 389922 |

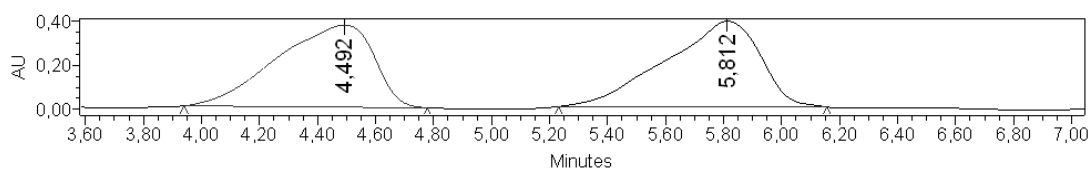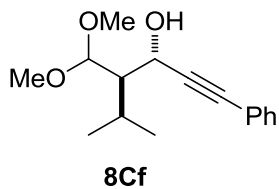

Processed Channel Descr.: PDA 240,0 nm

|   | Processed Channel Descr. | RT    | Area     | % Area | Height  |
|---|--------------------------|-------|----------|--------|---------|
| 1 | PDA 240,0 nm             | 6,003 | 324987   | 0,63   | 18395   |
| 2 | PDA 240,0 nm             | 7,283 | 51651122 | 99,37  | 2115425 |

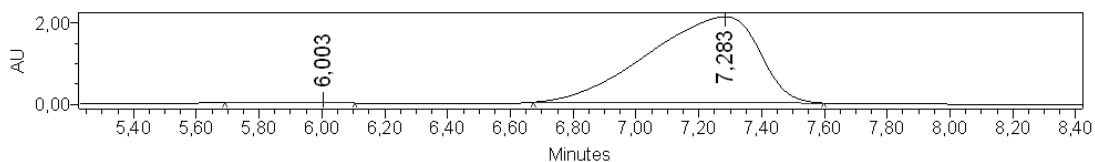



PDA 218nm, Chiralpak IC, 99:1 hex:Et, f:1mL/min

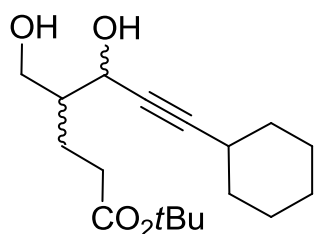

**(±)anti-3De**

Processed Channel Descr.: PDA 218,0 nm

|   | Processed Channel Descr. | RT     | Area     | % Area | Height |
|---|--------------------------|--------|----------|--------|--------|
| 1 | PDA 218,0 nm             | 29,879 | 5989969  | 11,26  | 62019  |
| 2 | PDA 218,0 nm             | 37,293 | 21189331 | 39,84  | 134316 |
| 3 | PDA 218,0 nm             | 43,556 | 21594696 | 40,60  | 133255 |
| 4 | PDA 218,0 nm             | 54,750 | 4413243  | 8,30   | 23553  |

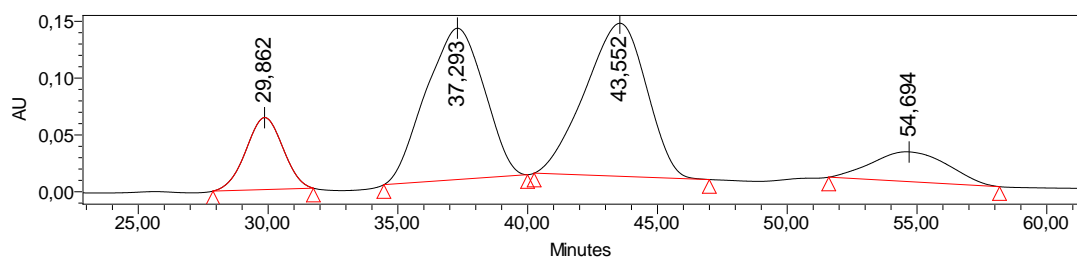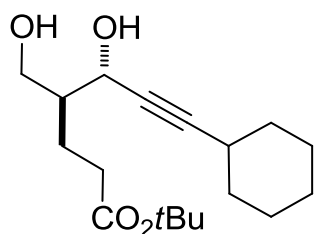

**3De**

Processed Channel Descr.: PDA 218,0 nm

|   | Processed Channel Descr. | RT     | Area     | % Area | Height |
|---|--------------------------|--------|----------|--------|--------|
| 1 | PDA 218,0 nm             | 34,971 | 77334    | 0,13   | 1823   |
| 2 | PDA 218,0 nm             | 40,645 | 60933758 | 99,87  | 333168 |

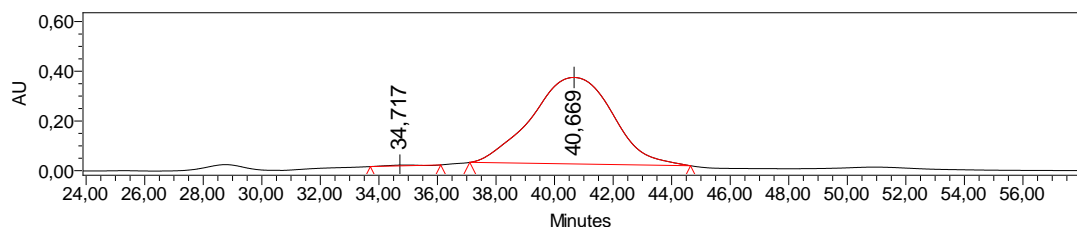

PDA 207.0 nm, Phenomenex Lux 3 $\mu$  Cellulose-4,

90 :10 hex :ipr, f :1.5 mL/min

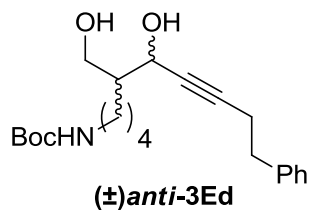

Processed Channel Descr.: PDA 207.0 nm

|   | Processed Channel Descr. | RT     | Area     | % Area | Height |
|---|--------------------------|--------|----------|--------|--------|
| 1 | PDA 207.0 nm             | 33.251 | 13315513 | 47.23  | 188060 |
| 2 | PDA 207.0 nm             | 51.580 | 14878183 | 52.77  | 128701 |

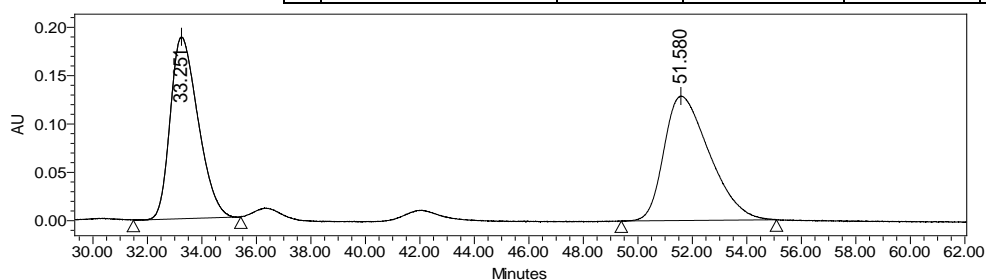

PDA 207.0 nm, Phenomenex Lux 3 $\mu$  Cellulose-4,

90 :10 hex :ipr, f :1.5 mL/min

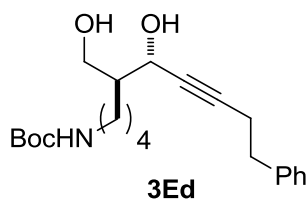

Processed Channel Descr.: PDA 207.0 nm

|   | Processed Channel Descr. | RT     | Area     | % Area | Height |
|---|--------------------------|--------|----------|--------|--------|
| 1 | PDA 207.0 nm             | 33.687 | 2617316  | 2.64   | 39337  |
| 2 | PDA 207.0 nm             | 49.238 | 96472644 | 97.36  | 557987 |

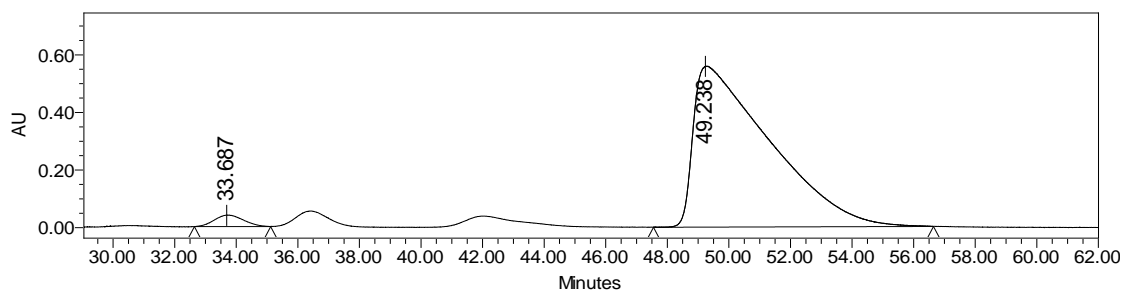

PDA 210nm, Chiralpak IB, 99:1 hex:ipr, f:1mL/min

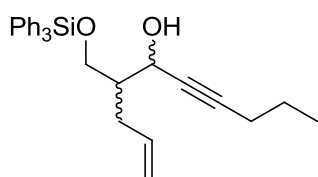

deriv.(±)*anti*3Fb

Processed Channel Descr.: PDA 210,0 nm

|   | Processed Channel Descr. | RT     | Area     | % Area | Height |
|---|--------------------------|--------|----------|--------|--------|
| 1 | PDA 210,0 nm             | 8,497  | 25139861 | 54,26  | 250911 |
| 2 | PDA 210,0 nm             | 13,205 | 21192560 | 45,74  | 256596 |

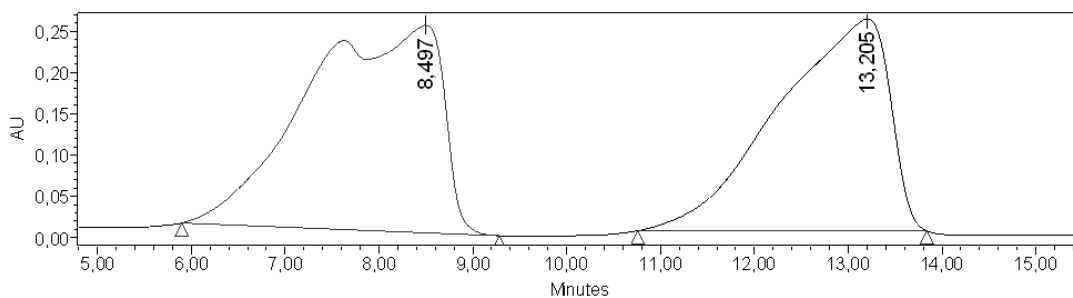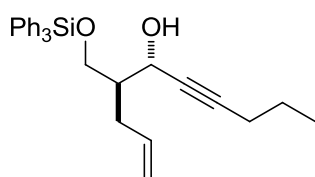

deriv.3Fb

Processed Channel Descr.: PDA 209,8 nm

|   | Processed Channel Descr. | RT     | Area    | % Area | Height |
|---|--------------------------|--------|---------|--------|--------|
| 1 | PDA 209,8 nm             | 7,575  | 365534  | 4,33   | 10439  |
| 2 | PDA 209,8 nm             | 16,949 | 8080611 | 95,67  | 70102  |

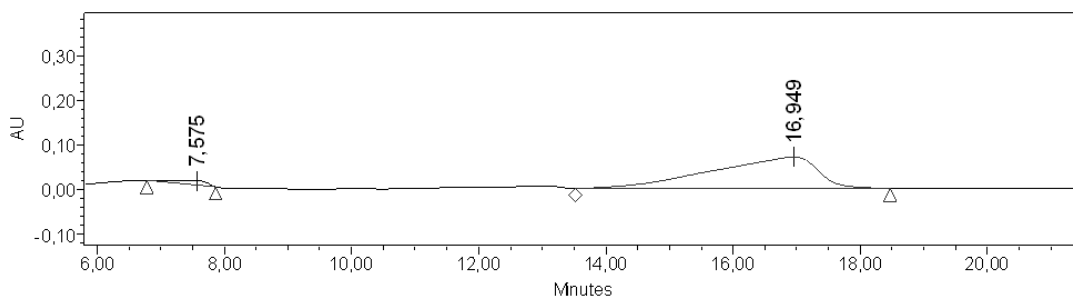

PDA 240nm, Chiralpak AD-H, 95:5 hex:ipr, f:0.5 mL/min

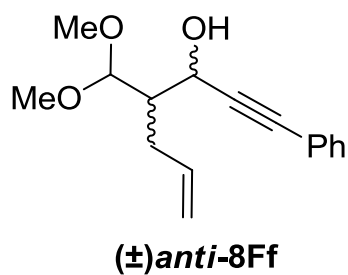

Processed Channel Descr.: PDA 240,0 nm

|   | Processed Channel Descr. | RT     | Area     | % Area | Height |
|---|--------------------------|--------|----------|--------|--------|
| 1 | PDA 240,0 nm             | 19,713 | 54485396 | 48,46  | 876391 |
| 2 | PDA 240,0 nm             | 21,830 | 57958813 | 51,54  | 812794 |

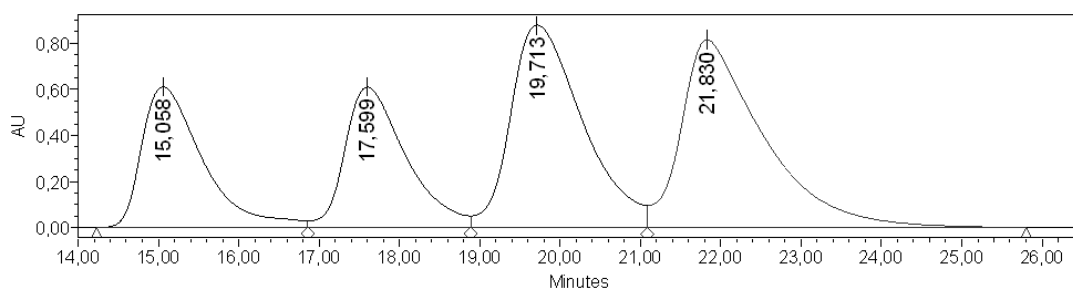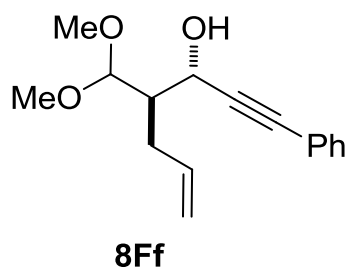

Processed Channel Descr.: PDA 240,0 nm

|   | Processed Channel Descr. | RT     | Area      | % Area | Height  |
|---|--------------------------|--------|-----------|--------|---------|
| 1 | PDA 240,0 nm             | 19,781 | 2824138   | 2,24   | 64368   |
| 2 | PDA 240,0 nm             | 22,014 | 123181399 | 97,76  | 1807772 |

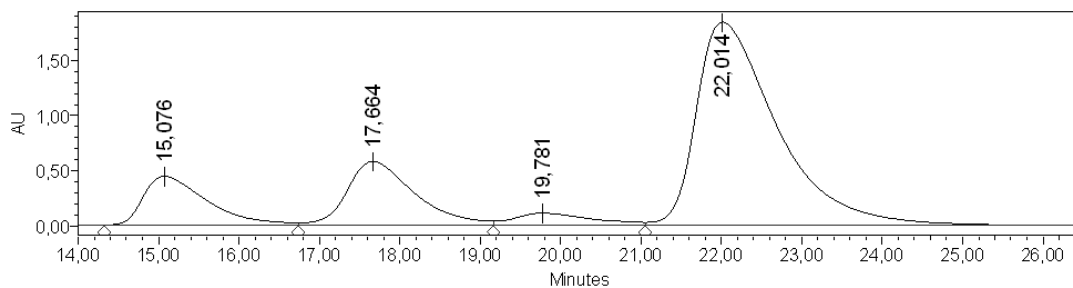

PDA 240nm, Chiralpak AY-H, hex f:1 mL/min

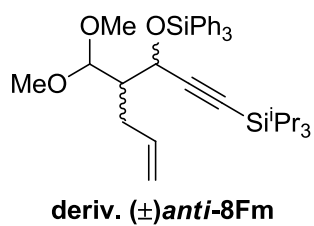

Processed Channel Descr.: PDA 240.0  
nm

|   | Processed Channel Descr. | RT    | Area    | % Area | Height |
|---|--------------------------|-------|---------|--------|--------|
| 1 | PDA 240.0 nm             | 4.084 | 1151453 | 42.36  | 64124  |
| 2 | PDA 240.0 nm             | 4.858 | 1566586 | 57.64  | 59833  |

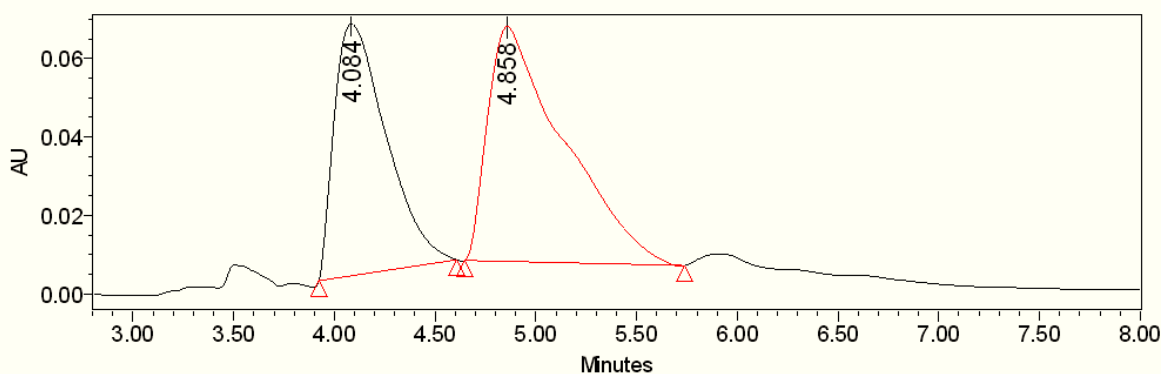

Processed Channel Descr.: PDA 234.1  
nm

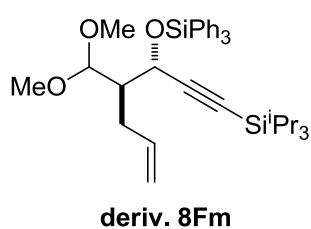

|   | Processed Channel Descr. | RT    | Area     | % Area | Height |
|---|--------------------------|-------|----------|--------|--------|
| 1 | PDA 234.1 nm             | 4.241 | 11176393 | 100.00 | 571846 |

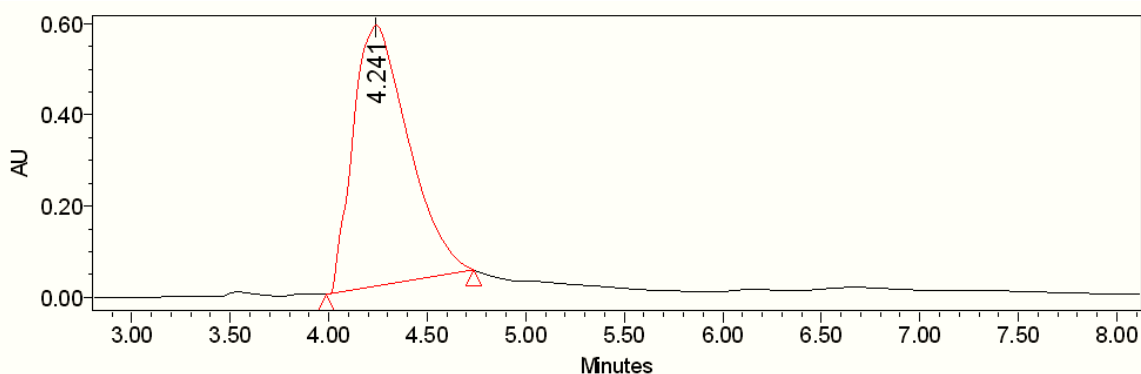

PDA 240nm, Chiralpak IB, 95:5 hex:ipr, f:1mL/min

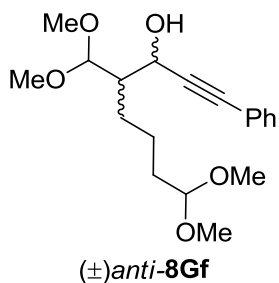

**Processed Channel Descr.: PDA 243.4 nm**

|   | Processed Channel Descr. | RT     | Area    | % Area | Height |
|---|--------------------------|--------|---------|--------|--------|
| 1 | PDA 243.4 nm             | 23.105 | 4379286 | 49.27  | 85241  |
| 2 | PDA 243.4 nm             | 25.719 | 4508588 | 50.73  | 80296  |

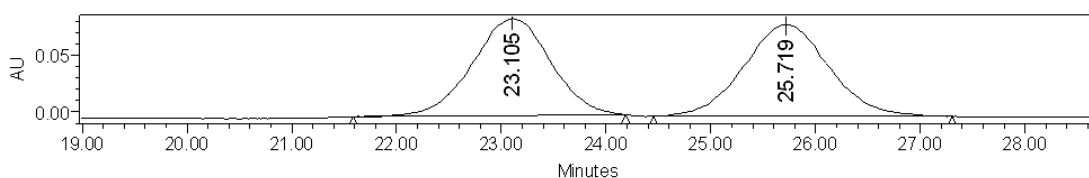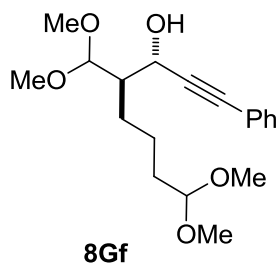

**Processed Channel Descr.: PDA 243.4 nm**

|   | Processed Channel Descr. | RT     | Area     | % Area | Height |
|---|--------------------------|--------|----------|--------|--------|
| 1 | PDA 243.4 nm             | 25.111 | 15052120 | 100.00 | 224132 |

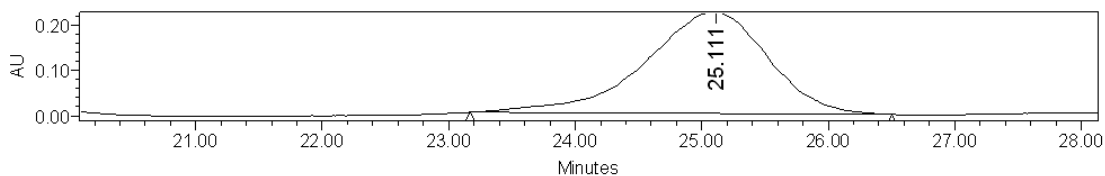

PDA 240nm, Chiralpak AD-H, 97:3 hex:ipr, f:1mL/min

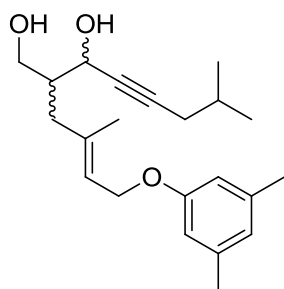

(±)*anti*-3Hc

Processed Channel Descr.: PDA 210,0 nm

|   | Processed Channel Descr. | RT     | Area      | % Area | Height |
|---|--------------------------|--------|-----------|--------|--------|
| 1 | PDA 210,0 nm             | 32,330 | 102202564 | 57,69  | 717221 |
| 2 | PDA 210,0 nm             | 37,265 | 74965294  | 42,31  | 572864 |

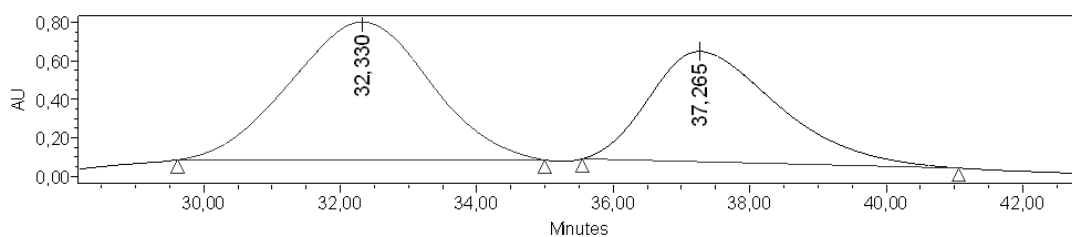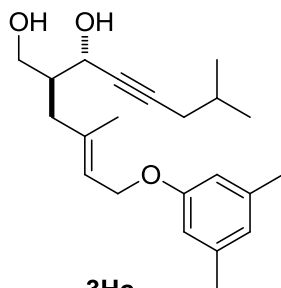

3Hc

Processed Channel Descr.: PDA 240,0  
nm

|   | Processed Channel Descr. | RT     | Area    | % Area | Height |
|---|--------------------------|--------|---------|--------|--------|
| 1 | PDA 240,0 nm             | 31,105 | 14786   | 0,37   | 330    |
| 2 | PDA 240,0 nm             | 36,602 | 3966787 | 99,63  | 31375  |

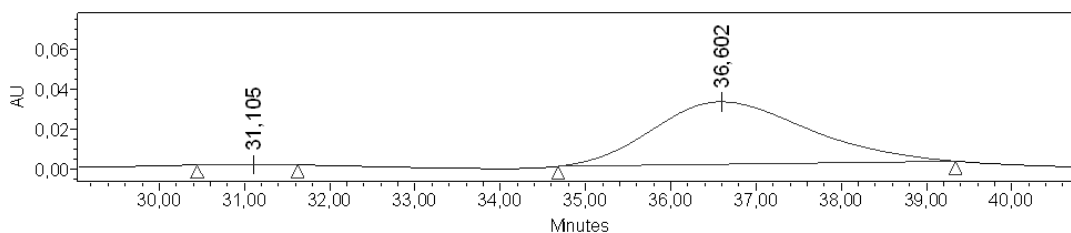

Supplement: c3sc51027a.pdf [file c3sc51027a.pdf]
